# Supplementary material for: Experimental verification of a subtle low-temperature phase transition suggested by DFT-D energy minimisation
Source: Royal Society of Chemistry journal article supplement (doi:10.1039/c0ce00676a), 2011-01-01
Supplement: c0ce00676a.fcf [file c0ce00676a.fcf]

# Supplementary Material (ESI) for CrystEngComm
# This journal is (c) The Royal Society of Chemistry 2011
                                                 
data_298K

_shelx_title ' ab0909_rt in Pbca' 
_shelx_refln_list_code          4 
_shelx_F_calc_maximum      364.29 
_exptl_crystal_F_000      1680.00 
_reflns_d_resolution_high  0.9503 
 
loop_ 
 _symmetry_equiv_pos_as_xyz 
 'x, y, z' 
 '-x+1/2, -y, z+1/2' 
 '-x, y+1/2, -z+1/2' 
 'x+1/2, -y+1/2, -z' 
 '-x, -y, -z' 
 'x-1/2, y, -z-1/2' 
 'x, -y-1/2, z-1/2' 
 '-x-1/2, y-1/2, z' 
 
_cell_length_a    14.4171 
_cell_length_b     8.0418 
_cell_length_c    31.4540 
_cell_angle_alpha  90.000 
_cell_angle_beta   90.000 
_cell_angle_gamma  90.000 
 
_shelx_F_squared_multiplier     1.000 
 
loop_ 
 _refln_index_h 
 _refln_index_k 
 _refln_index_l 
 _refln_F_squared_calc 
 _refln_F_squared_meas 
 _refln_F_squared_sigma 
 _refln_observed_status 
   4   0   0     5240.19     5244.64    159.44 o 
   6   0   0       77.54      137.91     50.09 o 
   8   0   0     3242.25     3125.63    141.46 o 
  10   0   0     1491.35     1261.61    206.65 o 
  12   0   0      570.08      474.62    159.40 o 
  14   0   0    10694.06     9025.21    665.56 o 
   2   1   0      828.77     1046.43     24.88 o 
   4   1   0     3033.99     2903.30     67.95 o 
   6   1   0     9235.17     8996.75    178.62 o 
   8   1   0     2082.09     2022.02     68.85 o 
  10   1   0      923.69      949.99     91.19 o 
  12   1   0     1298.03     1162.21    121.10 o 
  14   1   0        5.87      -91.81    171.88 o 
   0   2   0    15143.96    15608.97    395.04 o 
   2   2   0   132704.14   131207.63   2094.40 o 
   4   2   0      306.85      330.01     31.49 o 
   6   2   0      635.78      708.60     60.82 o 
   8   2   0     1497.26     1475.80     85.64 o 
  10   2   0      300.46      381.51     59.76 o 
  12   2   0     2759.42     2717.28    154.19 o 
  14   2   0       21.78       15.73    148.26 o 
   2   3   0     1697.52     1681.96     62.43 o 
   4   3   0     1140.02     1205.83     40.38 o 
   6   3   0     2014.16     2031.51     52.63 o 
   8   3   0      488.46      473.09     44.69 o 
  10   3   0       46.23      -28.92     59.09 o 
  12   3   0      431.35      379.91    144.98 o 
  14   3   0       22.02      122.76    153.43 o 
   0   4   0     3474.11     3490.90    112.86 o 
   2   4   0     4690.69     4676.78     91.14 o 
   4   4   0     4883.49     4745.32    103.47 o 
   6   4   0     2972.64     3202.39     98.66 o 
   8   4   0     1451.70     1593.44     91.55 o 
  10   4   0      170.83      168.06     61.06 o 
  12   4   0      618.15      704.22    136.78 o 
   2   5   0      588.54      704.67     53.46 o 
   4   5   0      421.16      376.21     41.74 o 
   6   5   0       18.28      -52.27     69.17 o 
   8   5   0      224.21      180.89     83.98 o 
  10   5   0      271.79      260.44    107.46 o 
  12   5   0      250.92      298.85    144.27 o 
   0   6   0     5985.91     5828.47    287.62 o 
   2   6   0      347.82      350.58     59.46 o 
   4   6   0      118.60      117.89     47.20 o 
   6   6   0      344.35      383.32    180.32 o 
   8   6   0        3.43     -113.47    113.47 o 
  10   6   0      104.83      153.50    139.97 o 
   2   7   0      183.37      182.98    158.37 o 
   4   7   0        4.84      129.78     72.59 o 
   6   7   0        0.58      269.85    138.50 o 
   8   7   0      512.72      539.15    313.75 o 
   0   8   0       63.29     -186.67    238.64 o 
   2   8   0      152.87      100.10    183.85 o 
   4   8   0      161.73      166.79    182.89 o 
   2   1   1    12920.59    12602.39    148.49 o 
   3   1   1     3809.26     3683.70     50.75 o 
   4   1   1      610.01      627.81     23.87 o 
   5   1   1      225.61      263.26     23.60 o 
   6   1   1      921.63      910.42     29.55 o 
   7   1   1     6810.22     6559.76    107.52 o 
   8   1   1     1021.56     1000.93     36.52 o 
   9   1   1     2126.97     2321.83     59.69 o 
  10   1   1      945.97     1008.09     41.77 o 
  11   1   1       37.64        6.30     37.88 o 
  12   1   1      342.16      348.90     80.35 o 
  13   1   1      162.34      139.47    111.95 o 
  14   1   1      178.53      126.62    124.91 o 
  15   1   1       23.96       -3.78    142.53 o 
   0   2   1      947.42     1050.52     27.25 o 
   1   2   1    22875.73    23133.41    290.30 o 
   2   2   1    46302.05    46817.66    581.56 o 
   3   2   1    48140.78    47808.02    531.45 o 
   4   2   1     4760.73     4701.67     60.51 o 
   5   2   1      678.01      687.37     25.05 o 
   6   2   1       18.68      -20.80     20.80 o 
   7   2   1     1623.22     1678.38     40.48 o 
   8   2   1      256.72      282.66     39.37 o 
   9   2   1        0.57      -15.04     34.03 o 
  10   2   1       99.62      144.40     38.94 o 
  11   2   1     3231.10     3235.88     82.12 o 
  12   2   1     2140.75     2039.51    106.77 o 
  13   2   1     2640.75     2564.05    130.42 o 
  14   2   1       26.38       92.66    104.28 o 
   1   3   1     1135.35     1053.76     26.93 o 
   2   3   1      551.69      536.08     25.10 o 
   3   3   1     4103.57     4069.31     57.75 o 
   4   3   1     1410.93     1369.31     31.90 o 
   5   3   1       29.02       16.95     23.08 o 
   6   3   1       31.18        7.78     20.24 o 
   7   3   1      109.02      169.32     25.88 o 
   8   3   1      751.74      754.32     32.66 o 
   9   3   1      142.34      110.61     33.35 o 
  10   3   1       38.51      -19.77     42.50 o 
  11   3   1        1.50       31.07     50.08 o 
  12   3   1      949.38      899.05     83.40 o 
  13   3   1        0.06      -93.07     93.07 o 
  14   3   1       51.40      108.75    106.41 o 
   0   4   1    11303.29    11072.83    219.32 o 
   1   4   1     7494.23     7396.49     99.69 o 
   2   4   1     2577.82     2562.51     45.74 o 
   3   4   1        0.11       25.90     22.49 o 
   4   4   1     2394.44     2444.45     44.94 o 
   5   4   1        4.15      -26.48     29.51 o 
   6   4   1      420.23      427.33     34.96 o 
   7   4   1      510.55      543.46     72.50 o 
   8   4   1      710.35      837.19     55.90 o 
   9   4   1     1351.21     1407.64     52.68 o 
  10   4   1      449.97      422.02     48.46 o 
  11   4   1      214.39      201.54     55.38 o 
  12   4   1      179.34       95.30     68.38 o 
  13   4   1      996.12     1124.14    107.05 o 
   1   5   1     1211.91     1300.21     46.67 o 
   2   5   1     4610.94     4455.67     76.33 o 
   3   5   1       24.85       78.12     30.01 o 
   4   5   1      816.75      867.61     36.66 o 
   5   5   1      521.38      471.61     37.37 o 
   6   5   1      942.51     1001.71     56.93 o 
   7   5   1     1058.89     1103.61     64.70 o 
   8   5   1     1373.33     1255.41     69.77 o 
   9   5   1        0.04      -17.97     71.36 o 
  10   5   1      933.70     1122.66     92.80 o 
  11   5   1       17.92       50.46     85.48 o 
  12   5   1      113.01       33.03    103.52 o 
   0   6   1     1958.67     1937.83    105.61 o 
   1   6   1     2446.87     2417.58     85.63 o 
   2   6   1      249.92      212.70     44.68 o 
   3   6   1        8.21       25.75     31.37 o 
   4   6   1      426.71      392.31     46.07 o 
   5   6   1     1289.51     1212.34     63.21 o 
   6   6   1      309.86      348.78     94.62 o 
   7   6   1       82.55        3.33     80.05 o 
   8   6   1      416.16      369.78     87.18 o 
   9   6   1       67.75       -0.55     88.46 o 
  10   6   1     1051.76     1105.32    113.82 o 
   1   7   1       58.08       12.12    102.51 o 
   2   7   1      215.52      139.52    107.61 o 
   3   7   1        4.71       74.27    104.85 o 
   4   7   1      157.74       75.23     57.58 o 
   5   7   1      397.00      349.01     84.90 o 
   6   7   1      396.40      308.75     89.84 o 
   7   7   1        4.61     -100.64    100.64 o 
   8   7   1      384.79      264.89    116.48 o 
   0   8   1        1.46     -143.28    175.32 o 
   1   8   1       34.04      270.16    138.94 o 
   2   8   1       45.33     -130.51    130.51 o 
   3   8   1      492.97      417.56    148.20 o 
   4   8   1      276.81       24.80    136.48 o 
   3   0   2     4923.06     4860.34    121.33 o 
   4   0   2     1081.40      964.64     40.97 o 
   5   0   2     2380.37     2325.26     64.80 o 
   6   0   2     5562.57     5536.61    132.57 o 
   7   0   2       72.76       51.70     30.82 o 
   8   0   2     3056.61     2958.20     94.46 o 
   9   0   2     3773.92     3647.47    130.34 o 
  10   0   2     2074.65     2148.01    126.69 o 
  11   0   2     7133.13     6795.44    269.78 o 
  12   0   2       44.91        9.89     92.43 o 
  13   0   2      993.59     1082.01    198.55 o 
  14   0   2       51.33      -30.70    296.20 o 
  15   0   2     1942.05     1892.41    245.55 o 
   2   1   2      890.02      872.14     16.54 o 
   3   1   2    38111.72    37838.72    496.95 o 
   4   1   2      130.56      113.93     21.33 o 
   5   1   2     9131.67     8825.31    145.88 o 
   6   1   2     3287.99     3222.51     65.75 o 
   7   1   2     2019.97     2232.65     60.49 o 
   8   1   2       37.67       61.93     41.13 o 
   9   1   2     3128.64     3062.13     78.21 o 
  10   1   2        4.09        0.50     39.55 o 
  11   1   2     1778.46     1969.38     75.13 o 
  12   1   2     5027.36     4894.43    143.53 o 
  13   1   2      610.89      533.83    127.62 o 
  14   1   2       79.59       61.98    123.74 o 
  15   1   2      473.32      304.09    138.96 o 
   0   2   2    25846.70    25292.40    446.15 o 
   1   2   2     8458.38     8173.33    101.59 o 
   2   2   2       43.54       41.50     13.03 o 
   3   2   2     4592.63     4564.21     59.46 o 
   4   2   2    15980.45    15603.85    185.78 o 
   5   2   2     1736.24     1831.08     35.54 o 
   6   2   2      139.57      109.14     27.58 o 
   7   2   2     3055.37     3205.85     67.53 o 
   8   2   2      156.65      153.54     31.08 o 
   9   2   2     1301.11     1304.86     43.02 o 
  10   2   2      627.82      702.17     43.81 o 
  11   2   2      281.30      291.60     52.61 o 
  12   2   2        0.28      -66.00     66.00 o 
  13   2   2      797.82      762.96    122.29 o 
  14   2   2        0.01       47.54    103.87 o 
   1   3   2     1178.84     1221.91     29.00 o 
   2   3   2     2770.44     2839.56     45.96 o 
   3   3   2     1694.80     1686.47     34.57 o 
   4   3   2     6359.90     6424.31     86.79 o 
   5   3   2      562.84      681.54     26.80 o 
   6   3   2     1042.16     1041.30     29.59 o 
   7   3   2     3343.57     3321.45     60.92 o 
   8   3   2      197.74      199.03     30.01 o 
   9   3   2      116.96       55.41     36.53 o 
  10   3   2     6918.77     7054.79    143.78 o 
  11   3   2      510.21      454.90     54.59 o 
  12   3   2       70.79        9.84     62.57 o 
  13   3   2        3.37      -92.64     92.82 o 
  14   3   2       75.37       36.13    106.77 o 
   0   4   2     3121.65     3113.27     75.70 o 
   1   4   2     2780.28     2826.38     46.60 o 
   2   4   2     4328.81     4106.67     65.07 o 
   3   4   2      827.11      834.40     30.89 o 
   4   4   2     2289.37     2236.44     45.87 o 
   5   4   2     4403.10     4301.18     78.03 o 
   6   4   2        3.83       21.10     34.84 o 
   7   4   2      345.90      302.95     42.79 o 
   8   4   2       33.60       59.38     35.82 o 
   9   4   2       19.55      -21.35     38.81 o 
  10   4   2     1056.34     1040.67     50.22 o 
  11   4   2      362.76      370.12     85.48 o 
  12   4   2      539.43      519.78     78.99 o 
  13   4   2       40.63        3.81     94.45 o 
   1   5   2     1531.72     1467.73     53.76 o 
   2   5   2      451.07      567.03     32.25 o 
   3   5   2      603.11      558.80     46.16 o 
   4   5   2      123.60      127.52     33.41 o 
   5   5   2     2009.86     2082.45     57.25 o 
   6   5   2       44.45       78.92     47.11 o 
   7   5   2      768.53      890.72     59.09 o 
   8   5   2      773.92      761.94     65.86 o 
   9   5   2      281.08      257.44     76.07 o 
  10   5   2       36.61       62.32     78.35 o 
  11   5   2      251.31      183.84    105.32 o 
  12   5   2      142.33       50.80    105.43 o 
   0   6   2      673.67      455.72     80.25 o 
   1   6   2      278.71      240.37     52.45 o 
   2   6   2        8.01        4.95     38.44 o 
   3   6   2        1.35        3.01     37.76 o 
   4   6   2       21.58       -6.15     43.72 o 
   5   6   2      284.97      228.27     51.14 o 
   6   6   2      518.23      409.55     72.81 o 
   7   6   2      132.72      131.45     73.85 o 
   8   6   2        8.93       55.16     88.61 o 
   9   6   2      229.15      188.23     93.12 o 
  10   6   2        1.22       -5.64     96.92 o 
   1   7   2      119.36      240.39    104.43 o 
   2   7   2      183.05      -21.46    102.52 o 
   3   7   2      648.31      427.07    114.54 o 
   4   7   2      713.18      704.77     62.53 o 
   5   7   2      353.71      507.51     86.81 o 
   6   7   2        6.64      100.07     88.03 o 
   7   7   2      246.76      111.75    103.16 o 
   8   7   2      372.92      246.69    109.66 o 
   0   8   2       26.22       89.92    177.15 o 
   1   8   2      187.60      217.99    127.18 o 
   2   8   2       89.17      111.19    126.45 o 
   3   8   2      291.47      406.11    167.19 o 
   4   8   2      120.09       17.92    151.64 o 
   2   1   3     7887.38     7702.02     92.72 o 
   3   1   3    52126.23    50963.67    686.53 o 
   4   1   3     1118.23     1184.36     34.53 o 
   5   1   3     5786.90     5448.99     92.97 o 
   6   1   3     2174.87     2221.49     50.84 o 
   7   1   3       49.59       75.48     24.70 o 
   8   1   3     1956.09     2064.03     60.45 o 
   9   1   3      154.22      162.48     40.14 o 
  10   1   3      414.30      449.91     47.20 o 
  11   1   3     1873.84     1952.82     72.37 o 
  12   1   3      282.31      274.71     58.83 o 
  13   1   3      532.11      632.04     81.79 o 
  14   1   3      165.72      171.21    128.34 o 
  15   1   3       99.58     -118.09    124.02 o 
   0   2   3    99476.31    97327.20   1796.16 o 
   1   2   3      324.00      327.45     15.95 o 
   2   2   3      877.21      939.74     25.46 o 
   3   2   3    15090.75    14973.96    174.63 o 
   4   2   3      502.06      582.57     24.57 o 
   5   2   3     1806.76     1841.87     34.83 o 
   6   2   3      984.58     1038.69     31.33 o 
   7   2   3       76.78       23.40     26.39 o 
   8   2   3      749.88      799.81     36.67 o 
   9   2   3      500.71      570.26     37.59 o 
  10   2   3      355.57      473.67     37.20 o 
  11   2   3       45.83      -31.81     40.23 o 
  12   2   3      510.61      493.67     65.59 o 
  13   2   3      615.88      451.75     76.75 o 
  14   2   3      746.51      790.40    112.15 o 
   1   3   3      762.28      765.69     23.67 o 
   2   3   3      485.44      494.25     26.08 o 
   3   3   3     1494.16     1376.48     31.73 o 
   4   3   3        3.62       30.01     19.79 o 
   5   3   3     5779.38     5561.72     76.62 o 
   6   3   3     6863.35     6686.83     90.33 o 
   7   3   3      551.48      565.22     30.23 o 
   8   3   3     1001.28     1012.94     43.38 o 
   9   3   3     2585.80     2677.60     75.46 o 
  10   3   3      305.88      202.96     44.96 o 
  11   3   3      385.41      445.72     54.34 o 
  12   3   3      431.38      420.79     73.04 o 
  13   3   3        1.01      -88.37     94.29 o 
  14   3   3       88.08       89.15    103.28 o 
   0   4   3     3285.89     3252.53     78.47 o 
   1   4   3      680.55      714.32     26.90 o 
   2   4   3    10140.85    10380.66    147.57 o 
   3   4   3     6791.48     6717.31    102.33 o 
   4   4   3       19.04      -11.06     27.47 o 
   5   4   3      104.93       15.55     31.18 o 
   6   4   3       87.71       75.46     36.80 o 
   7   4   3        1.61       -2.43     40.74 o 
   8   4   3        8.68      -12.66     34.56 o 
   9   4   3      353.11      366.65     41.58 o 
  10   4   3       10.99        2.73     44.32 o 
  11   4   3      374.91      354.05     54.96 o 
  12   4   3      880.21      847.14     84.25 o 
  13   4   3      317.95      276.58     95.45 o 
   1   5   3      168.72      182.83     29.27 o 
   2   5   3        0.35        0.94     27.49 o 
   3   5   3     1065.49     1078.21     40.92 o 
   4   5   3      192.87      138.68     37.59 o 
   5   5   3      150.34      129.03     37.57 o 
   6   5   3      637.48      643.52     51.37 o 
   7   5   3     1538.68     1548.97     68.06 o 
   8   5   3       31.13       31.32     57.21 o 
   9   5   3      505.69      477.06    102.46 o 
  10   5   3        1.40       10.77     77.56 o 
  11   5   3       41.45        6.34     84.32 o 
  12   5   3        0.12       69.27    129.11 o 
   0   6   3      124.54      115.52     72.48 o 
   1   6   3      737.25      726.39     56.88 o 
   2   6   3     1065.79     1115.04     49.07 o 
   3   6   3      266.88      257.11     39.83 o 
   4   6   3      624.28      568.65     55.74 o 
   5   6   3      401.05      299.86     51.93 o 
   6   6   3      241.82      230.83     71.90 o 
   7   6   3       36.79       61.23     70.20 o 
   8   6   3      236.60      128.76    104.66 o 
   9   6   3       90.04      -87.96     91.18 o 
  10   6   3       17.80       -5.57     99.43 o 
   1   7   3        5.28       73.21    108.77 o 
   2   7   3      103.83      137.32    107.53 o 
   3   7   3      155.04      206.01     70.44 o 
   4   7   3      304.42      250.44     58.53 o 
   5   7   3      305.88      342.83     84.35 o 
   6   7   3       30.19      -86.30     86.30 o 
   7   7   3      102.43       79.13     95.41 o 
   8   7   3        0.81     -112.06    112.06 o 
   0   8   3       18.58       49.08    177.34 o 
   1   8   3       96.10      -20.28    125.98 o 
   2   8   3      107.38      171.72    128.89 o 
   3   8   3       14.37      -36.26    150.01 o 
   4   8   3       39.79      118.93    163.67 o 
   2   0   4     7265.22     6823.68    164.93 o 
   3   0   4    21808.39    20930.43    593.91 o 
   4   0   4    50619.39    49236.69   1382.53 o 
   5   0   4     7045.64     7126.30    177.24 o 
   6   0   4     7119.53     7426.85    189.11 o 
   7   0   4      378.31      308.51     42.65 o 
   8   0   4      588.81      741.94     78.32 o 
   9   0   4      160.56      117.80     59.68 o 
  10   0   4      183.15      202.13     85.89 o 
  11   0   4      572.64      451.62     98.70 o 
  12   0   4     2059.31     2288.70    303.14 o 
  13   0   4      632.91      699.64    120.42 o 
  14   0   4     1508.91     1460.32    209.04 o 
  15   0   4      118.70       87.53    233.98 o 
   1   1   4       45.49       32.97     10.13 o 
   2   1   4      152.04      122.68     15.97 o 
   3   1   4    19397.67    19113.97    241.15 o 
   4   1   4    15059.31    14788.34    210.93 o 
   5   1   4      282.96      246.65     26.53 o 
   6   1   4      603.56      607.10     32.68 o 
   7   1   4      582.31      622.91     40.53 o 
   8   1   4       98.77       95.76     34.83 o 
   9   1   4      473.69      465.75     52.25 o 
  10   1   4     3886.34     3655.09    100.05 o 
  11   1   4        4.06        1.60     56.90 o 
  12   1   4     1011.61      991.86     73.53 o 
  13   1   4      453.57      461.20    100.97 o 
  14   1   4       22.18       91.72     98.58 o 
   0   2   4     2688.90     2880.51     59.43 o 
   1   2   4    20954.80    20527.21    258.70 o 
   2   2   4    13593.72    13183.77    157.43 o 
   3   2   4      230.13      189.03     15.87 o 
   4   2   4     1236.25     1237.23     26.42 o 
   5   2   4      300.30      304.15     22.54 o 
   6   2   4      295.41      270.67     25.08 o 
   7   2   4       24.42       25.46     27.74 o 
   8   2   4      579.83      644.97     35.36 o 
   9   2   4      355.11      429.47     37.18 o 
  10   2   4      315.13      340.19     41.25 o 
  11   2   4       80.25       62.70     44.38 o 
  12   2   4      709.98      724.83     59.18 o 
  13   2   4      275.41      286.91     75.99 o 
  14   2   4        0.44      -92.29     92.29 o 
   1   3   4     5820.83     5549.28     76.17 o 
   2   3   4     2400.07     2405.24     40.69 o 
   3   3   4      845.66      921.18     24.23 o 
   4   3   4     4754.80     4963.88     69.35 o 
   5   3   4    14059.43    14443.70    172.24 o 
   6   3   4     7450.16     7566.53    102.25 o 
   7   3   4     1166.70     1200.62     34.95 o 
   8   3   4     2941.56     3016.48     71.76 o 
   9   3   4     1701.58     1643.69     60.36 o 
  10   3   4     1040.64     1219.56     68.60 o 
  11   3   4      424.02      376.25     55.86 o 
  12   3   4      161.41      140.64     73.60 o 
  13   3   4       22.51      -76.78     76.78 o 
  14   3   4        2.89       53.79    108.31 o 
   0   4   4     1876.55     1878.19     50.13 o 
   1   4   4    12212.89    12390.93    176.52 o 
   2   4   4      463.88      590.42     27.13 o 
   3   4   4      150.39      158.76     31.23 o 
   4   4   4        2.16       32.48     27.96 o 
   5   4   4      494.79      444.56     33.81 o 
   6   4   4       51.82       76.37     37.71 o 
   7   4   4       96.51       95.98     35.61 o 
   8   4   4      179.56      131.62     38.21 o 
   9   4   4        0.32      -45.61     45.61 o 
  10   4   4       57.69       86.60     45.08 o 
  11   4   4      213.07      215.07     52.20 o 
  12   4   4      360.99      320.12     71.09 o 
  13   4   4      356.05      203.51     93.01 o 
   1   5   4      854.83      821.98     37.01 o 
   2   5   4       14.21      -25.22     27.89 o 
   3   5   4      543.31      595.60     53.87 o 
   4   5   4      290.42      178.22     45.44 o 
   5   5   4      410.17      324.64     40.03 o 
   6   5   4      154.51       26.93     46.84 o 
   7   5   4     7575.90     7266.05    154.42 o 
   8   5   4      138.85      192.35     55.55 o 
   9   5   4      294.98      313.94     80.17 o 
  10   5   4      255.44      478.05     79.65 o 
  11   5   4        4.45       -8.68     86.06 o 
  12   5   4       56.67       63.93    122.41 o 
   0   6   4      720.10      695.51     93.90 o 
   1   6   4      203.78      186.78     57.56 o 
   2   6   4       21.76      -38.37     39.47 o 
   3   6   4       96.39       39.88     42.63 o 
   4   6   4      207.33      115.83     45.66 o 
   5   6   4      240.51      248.17     50.62 o 
   6   6   4       17.29       -7.43     63.99 o 
   7   6   4       58.82       92.01     71.21 o 
   8   6   4       29.46       38.54     83.23 o 
   9   6   4      383.60      436.36     96.79 o 
  10   6   4       22.52      -96.51     96.51 o 
   1   7   4       76.50       19.24    103.37 o 
   2   7   4      794.87      897.47    118.86 o 
   3   7   4      792.25      769.60     73.86 o 
   4   7   4        6.46       28.44     64.53 o 
   5   7   4      191.16       99.02     81.97 o 
   6   7   4      167.98      118.84     89.36 o 
   7   7   4      558.87      644.09    139.95 o 
   8   7   4        0.22      153.89    161.61 o 
   0   8   4      138.06      167.17    184.90 o 
   1   8   4        0.86     -121.14    121.14 o 
   2   8   4       75.98      175.12    147.31 o 
   3   8   4      122.76      199.29    162.28 o 
   4   8   4        2.33     -108.16    155.68 o 
   1   1   5    12744.72    12557.80    173.77 o 
   2   1   5     4520.45     4546.04     67.16 o 
   3   1   5       56.33       47.74     19.00 o 
   4   1   5       43.58       32.72     18.96 o 
   5   1   5       39.41       14.82     21.89 o 
   6   1   5      161.90      180.32     27.04 o 
   7   1   5    20615.29    20936.12    364.29 o 
   8   1   5     1710.83     1784.30     87.15 o 
   9   1   5      972.19      936.86     71.90 o 
  10   1   5     2430.85     2474.28     89.86 o 
  11   1   5       11.29       -6.56     59.30 o 
  12   1   5     3955.75     3972.33    137.34 o 
  13   1   5       40.41       45.43     91.53 o 
  14   1   5      249.95      173.84    100.46 o 
   0   2   5      564.08      603.22     26.95 o 
   1   2   5    14489.33    14086.88    175.67 o 
   2   2   5     2758.24     2660.28     40.91 o 
   3   2   5     2828.26     2875.93     45.25 o 
   4   2   5     1280.66     1252.63     28.29 o 
   5   2   5      417.75      452.96     22.82 o 
   6   2   5     1030.71      928.09     30.69 o 
   7   2   5       19.00       19.30     30.36 o 
   8   2   5     2524.45     2515.15     64.77 o 
   9   2   5        0.79       11.48     42.59 o 
  10   2   5     1940.17     1875.83     64.11 o 
  11   2   5     3574.81     3591.17     88.46 o 
  12   2   5      276.81      223.71     58.05 o 
  13   2   5      368.10      448.78    101.27 o 
  14   2   5        9.50      -31.30     95.15 o 
   1   3   5     1672.27     1569.49     37.21 o 
   2   3   5     2820.48     2820.59     44.38 o 
   3   3   5       15.50       -6.89     19.19 o 
   4   3   5      356.85      359.82     22.43 o 
   5   3   5     2776.40     2941.06     47.45 o 
   6   3   5     3612.31     3611.21     58.98 o 
   7   3   5     2216.97     2299.34     56.51 o 
   8   3   5      151.22       61.90     35.81 o 
   9   3   5      975.28     1148.24     50.77 o 
  10   3   5      799.55      953.32     70.78 o 
  11   3   5       84.42       75.25     66.30 o 
  12   3   5       66.30      -20.01     71.91 o 
  13   3   5       18.72      -79.86     79.86 o 
  14   3   5      158.97      119.76    101.43 o 
   0   4   5       36.46       16.09     37.01 o 
   1   4   5     1099.79     1157.97     32.33 o 
   2   4   5     3564.15     3633.00     63.22 o 
   3   4   5      479.61      434.32     30.90 o 
   4   4   5     3760.61     3747.96     72.15 o 
   5   4   5     1159.88     1151.09     45.86 o 
   6   4   5      379.49      389.08     34.64 o 
   7   4   5      249.58      259.88     35.94 o 
   8   4   5       39.67       34.88     37.70 o 
   9   4   5      836.96      957.26     60.83 o 
  10   4   5     1731.77     1728.61     72.54 o 
  11   4   5      239.66      229.29     51.70 o 
  12   4   5      395.45      300.26     72.47 o 
  13   4   5      171.00       74.24     84.73 o 
   1   5   5      141.53      124.87     34.12 o 
   2   5   5       45.11       42.06     25.55 o 
   3   5   5      559.62      591.99     40.19 o 
   4   5   5     1538.32     1492.59     55.56 o 
   5   5   5      102.39       94.86     40.32 o 
   6   5   5      433.11      456.45     53.38 o 
   7   5   5       99.06       84.57     58.83 o 
   8   5   5       98.15       50.46     54.75 o 
   9   5   5      405.54      374.68     80.27 o 
  10   5   5      619.57      788.01     92.37 o 
  11   5   5      179.37      140.88     83.43 o 
  12   5   5        6.94        2.26     98.77 o 
   0   6   5      799.25      902.34     87.11 o 
   1   6   5       43.68      106.04     49.32 o 
   2   6   5      820.19      906.31     49.77 o 
   3   6   5        0.17      -33.15     38.37 o 
   4   6   5      487.82      506.26     62.77 o 
   5   6   5       21.91      -10.24     49.97 o 
   6   6   5      122.64       92.28     66.61 o 
   7   6   5       83.54      116.59     72.05 o 
   8   6   5      128.11       65.79     75.74 o 
   9   6   5       30.58      113.38     97.56 o 
  10   6   5       39.36       78.22    111.77 o 
   1   7   5       14.99       74.52    120.86 o 
   2   7   5      428.72      352.29    128.60 o 
   3   7   5       58.15       18.21     70.40 o 
   4   7   5      295.45      343.53     93.72 o 
   5   7   5        0.36      -60.05     79.06 o 
   6   7   5      429.38      355.20     93.31 o 
   7   7   5       37.57      -41.23     95.03 o 
   8   7   5      172.72      182.96    104.98 o 
   0   8   5      458.92      292.62    249.03 o 
   1   8   5        2.19      -27.23    148.10 o 
   2   8   5        1.69      197.89    155.84 o 
   3   8   5       11.10       74.50    148.51 o 
   4   8   5       83.35       43.96     93.96 o 
   0   0   6    12836.44    11969.74    305.47 o 
   1   0   6    11013.23    10529.63    214.42 o 
   2   0   6    17483.30    16963.20    342.26 o 
   3   0   6    11510.58    11220.61    268.30 o 
   4   0   6     2147.19     1985.74     76.96 o 
   5   0   6      397.30      318.42     56.64 o 
   6   0   6    19736.97    19626.48    508.43 o 
   7   0   6      489.77      499.65     49.00 o 
   8   0   6     5571.03     5175.03    174.38 o 
   9   0   6      901.43      846.60     67.86 o 
  10   0   6      564.57      677.54    111.16 o 
  11   0   6      844.46      716.35    103.21 o 
  12   0   6     2317.23     2056.57    146.04 o 
  13   0   6      489.91      507.88    155.07 o 
  14   0   6        2.14     -246.94    246.94 o 
   1   1   6     7499.79     7238.02    101.13 o 
   2   1   6    11276.22    11162.73    156.74 o 
   3   1   6     1659.32     1611.06     42.84 o 
   4   1   6     1001.68     1107.29     33.07 o 
   5   1   6     1817.25     2057.21     47.07 o 
   6   1   6     3793.62     4287.10     84.57 o 
   7   1   6       46.62      -34.68     35.38 o 
   8   1   6     1529.33     1522.48     59.58 o 
   9   1   6     1871.09     1995.71     79.00 o 
  10   1   6        6.78      -53.87     53.87 o 
  11   1   6       29.40       41.16     60.44 o 
  12   1   6      217.86      126.28     69.30 o 
  13   1   6       52.99       52.75     75.33 o 
  14   1   6        5.27      -99.52     99.52 o 
   0   2   6    51641.66    50007.21    987.70 o 
   1   2   6      335.94      353.17     18.24 o 
   2   2   6     5003.44     4970.27     66.20 o 
   3   2   6     2139.46     2226.52     37.29 o 
   4   2   6     4434.33     4716.86     69.85 o 
   5   2   6      178.21      232.12     23.52 o 
   6   2   6        1.58       -5.69     23.35 o 
   7   2   6        0.26        2.37     28.64 o 
   8   2   6     2692.74     2727.28     68.13 o 
   9   2   6      127.58       34.95     45.60 o 
  10   2   6     2911.74     3141.19     90.57 o 
  11   2   6       28.15        6.19     47.11 o 
  12   2   6      594.23      674.08     67.53 o 
  13   2   6      309.24      270.24     79.09 o 
  14   2   6      450.78      547.52    101.98 o 
   1   3   6      178.85      174.70     20.25 o 
   2   3   6     1557.11     1535.89     31.85 o 
   3   3   6     1366.46     1471.64     30.71 o 
   4   3   6       71.95       65.38     21.27 o 
   5   3   6      482.54      462.56     31.40 o 
   6   3   6     4333.20     4153.25     71.89 o 
   7   3   6      511.04      529.97     42.99 o 
   8   3   6      811.95      749.82     40.42 o 
   9   3   6     1257.79     1247.97     57.40 o 
  10   3   6     1905.56     1922.11     84.82 o 
  11   3   6      287.46      139.45     63.97 o 
  12   3   6        3.94      -16.60     68.91 o 
  13   3   6      912.01      795.13     83.64 o 
   0   4   6      134.82      151.60     52.86 o 
   1   4   6     1765.11     1781.26     40.27 o 
   2   4   6     3738.81     3816.87     62.51 o 
   3   4   6     1506.67     1556.62     38.09 o 
   4   4   6     2753.17     2922.72     56.76 o 
   5   4   6       48.31       55.01     27.68 o 
   6   4   6     1481.30     1502.06     55.39 o 
   7   4   6      251.59      250.06     39.25 o 
   8   4   6       25.52       13.97     40.91 o 
   9   4   6      612.10      535.53     53.89 o 
  10   4   6      259.74      159.15     61.27 o 
  11   4   6       82.42       57.93     74.22 o 
  12   4   6      205.98      153.80     72.38 o 
  13   4   6      127.53       73.06     79.42 o 
   1   5   6       15.41       20.46     34.89 o 
   2   5   6      112.04      116.10     30.11 o 
   3   5   6       39.57      -15.46     34.62 o 
   4   5   6      197.01      161.56     32.30 o 
   5   5   6      377.18      422.40     45.12 o 
   6   5   6     1156.35     1241.96     59.95 o 
   7   5   6      250.15      108.80     58.72 o 
   8   5   6     1123.86      952.67     66.87 o 
   9   5   6      195.10      259.44     73.62 o 
  10   5   6       20.38      -80.14     80.14 o 
  11   5   6      191.92      195.67     98.58 o 
   0   6   6     1429.20     1323.10     95.19 o 
   1   6   6     1278.19     1361.13     72.23 o 
   2   6   6      100.47       67.53     42.92 o 
   3   6   6      176.00      219.82     40.71 o 
   4   6   6      464.59      405.29     50.48 o 
   5   6   6       17.08       11.67     50.66 o 
   6   6   6     1197.58     1096.80     79.75 o 
   7   6   6        1.03       30.44     72.53 o 
   8   6   6      184.29      148.16     83.35 o 
   9   6   6        6.23      -22.57     90.00 o 
  10   6   6        0.15        5.32    100.57 o 
   1   7   6        1.22      -35.14    128.23 o 
   2   7   6      311.40      265.44    171.56 o 
   3   7   6       28.27      -88.33     88.33 o 
   4   7   6      227.23      375.08     94.70 o 
   5   7   6      450.18      472.65     83.42 o 
   6   7   6       97.00       82.08     84.91 o 
   7   7   6      250.59      272.56     99.58 o 
   8   7   6      242.37      203.95    104.86 o 
   0   8   6       99.28      618.72    288.44 o 
   1   8   6        0.00       45.57    189.77 o 
   2   8   6      418.54      191.18    397.43 o 
   3   8   6        9.10       54.71    154.53 o 
   4   8   6       22.03      -92.78    103.18 o 
   1   1   7    20549.96    19832.07    281.30 o 
   2   1   7     2459.05     2361.74     45.36 o 
   3   1   7     3217.05     3395.79     60.47 o 
   4   1   7    20630.77    19990.67    317.72 o 
   5   1   7       14.14        1.08     24.80 o 
   6   1   7     1422.76     1402.94     40.97 o 
   7   1   7      817.54      775.91     39.18 o 
   8   1   7     2319.31     2449.83     95.11 o 
   9   1   7     1251.12     1312.83     62.48 o 
  10   1   7       97.49      101.94     53.91 o 
  11   1   7      523.50      574.77     62.31 o 
  12   1   7      175.52      156.09     71.11 o 
  13   1   7       18.79       12.44     79.07 o 
  14   1   7      382.20      336.43    108.13 o 
   0   2   7    14429.09    13874.47    266.35 o 
   1   2   7      158.46      162.60     18.71 o 
   2   2   7     3431.65     3206.84     49.56 o 
   3   2   7     6939.43     6853.51     91.93 o 
   4   2   7     4931.18     4995.30     71.70 o 
   5   2   7     3942.16     3788.93     60.95 o 
   6   2   7       24.90       22.64     23.54 o 
   7   2   7      187.23      159.62     31.08 o 
   8   2   7      526.84      601.20     41.09 o 
   9   2   7      387.18      464.21     49.52 o 
  10   2   7      230.19      267.58     60.08 o 
  11   2   7       42.49        3.12     56.68 o 
  12   2   7       11.69      -23.91     68.52 o 
  13   2   7       27.35      -37.73     96.16 o 
  14   2   7      108.90       -0.64     97.11 o 
   1   3   7      463.77      430.17     27.27 o 
   2   3   7      222.44      221.30     20.19 o 
   3   3   7       96.44      126.98     20.00 o 
   4   3   7     5151.62     5105.50     74.29 o 
   5   3   7     4849.16     4694.36     78.90 o 
   6   3   7     1682.55     1735.34     43.38 o 
   7   3   7     2267.79     2320.82     55.04 o 
   8   3   7      603.90      641.56     41.54 o 
   9   3   7     1228.06     1351.89     58.53 o 
  10   3   7     1371.92     1387.60     65.55 o 
  11   3   7        0.84       31.95     63.42 o 
  12   3   7      163.65        4.08     69.82 o 
  13   3   7        2.41      -25.02     76.65 o 
   0   4   7     2086.25     1919.17     68.27 o 
   1   4   7       18.12      -20.26     23.48 o 
   2   4   7     1428.11     1521.21     48.60 o 
   3   4   7      165.71      156.04     24.49 o 
   4   4   7      319.06      277.56     27.12 o 
   5   4   7     6279.53     6364.38    103.47 o 
   6   4   7       36.84       74.23     35.31 o 
   7   4   7      231.54      233.01     44.94 o 
   8   4   7       52.93       71.28     44.88 o 
   9   4   7     1311.40     1363.53     61.90 o 
  10   4   7      304.11      288.97     68.61 o 
  11   4   7       14.32       14.84     54.87 o 
  12   4   7      530.20      451.47     76.30 o 
   1   5   7      456.12      486.82     33.49 o 
   2   5   7     2635.52     2655.07     74.78 o 
   3   5   7      953.25      898.14     36.83 o 
   4   5   7      108.81       81.03     33.30 o 
   5   5   7        0.33       35.16     37.72 o 
   6   5   7     1122.76     1137.63     60.35 o 
   7   5   7     1180.53     1158.33     66.12 o 
   8   5   7      307.65      398.68     74.37 o 
   9   5   7       15.87       25.13     80.77 o 
  10   5   7        0.49      -45.22     88.30 o 
  11   5   7        0.72       46.77     72.80 o 
   0   6   7       12.81      108.62     95.77 o 
   1   6   7     2251.10     2427.64     72.40 o 
   2   6   7      342.47      332.65     47.32 o 
   3   6   7      421.36      255.95     41.60 o 
   4   6   7     1234.14     1190.00     68.76 o 
   5   6   7       87.91       78.18     45.62 o 
   6   6   7      367.86      241.94     84.72 o 
   7   6   7        0.05       -8.49     78.25 o 
   8   6   7       60.03      142.36    110.45 o 
   9   6   7      105.56     -100.70    100.70 o 
  10   6   7      457.68      290.88    121.26 o 
   1   7   7        8.52     -101.13    122.36 o 
   2   7   7      208.35      327.91     89.14 o 
   3   7   7      137.54       52.02     96.70 o 
   4   7   7       54.71      -12.53    103.90 o 
   5   7   7       33.28       56.72     77.32 o 
   6   7   7        6.28       -9.33     91.34 o 
   7   7   7      791.46      667.45    108.02 o 
   0   8   7      675.43      558.79    291.95 o 
   1   8   7      601.33      419.96    198.99 o 
   2   8   7        5.85      -83.62    184.94 o 
   3   8   7      257.63      472.45    204.43 o 
   0   0   8      496.51      496.28     33.33 o 
   1   0   8    16569.82    16039.46    289.25 o 
   2   0   8       33.63       46.74     27.83 o 
   3   0   8      408.65      510.01     42.66 o 
   4   0   8    18859.63    19194.50    495.37 o 
   5   0   8     2462.36     2818.41     92.67 o 
   6   0   8        5.14      -27.59     68.00 o 
   7   0   8      357.89      238.41     66.59 o 
   8   0   8     8662.57     8531.12    269.28 o 
   9   0   8       33.88      -11.79     60.32 o 
  10   0   8        1.08      -61.02     61.02 o 
  11   0   8      242.89      280.90    100.22 o 
  12   0   8     1109.85     1016.18    131.79 o 
  13   0   8     4139.22     3990.76    362.32 o 
  14   0   8       46.12      -35.28    180.75 o 
   1   1   8       54.08       50.85     16.40 o 
   2   1   8     6709.44     6732.50    107.03 o 
   3   1   8     1285.56     1286.27     34.04 o 
   4   1   8       16.15       35.37     25.60 o 
   5   1   8     3079.57     3218.56     62.39 o 
   6   1   8     6559.75     6836.74    117.52 o 
   7   1   8    24234.37    25155.55    417.91 o 
   8   1   8      399.80      436.46     48.26 o 
   9   1   8       55.66       70.64     54.91 o 
  10   1   8        5.45      -52.85     52.85 o 
  11   1   8      237.23      159.20     59.25 o 
  12   1   8      238.18      243.56     76.60 o 
  13   1   8        5.66      103.54     90.44 o 
  14   1   8        9.15       45.43    103.54 o 
   0   2   8     1846.71     1827.37     53.09 o 
   1   2   8     3209.53     3272.21     57.23 o 
   2   2   8     8124.76     8258.35    114.22 o 
   3   2   8       78.39       23.19     23.46 o 
   4   2   8     2575.36     2630.45     49.86 o 
   5   2   8       39.03      -23.24     23.24 o 
   6   2   8      718.25      714.14     32.01 o 
   7   2   8      317.15      258.18     29.63 o 
   8   2   8       12.23      -40.79     40.79 o 
   9   2   8     1615.06     1608.29     68.02 o 
  10   2   8      724.67      747.62     62.93 o 
  11   2   8      121.52      164.21     65.48 o 
  12   2   8        6.14       13.98     66.50 o 
  13   2   8       98.15       65.34     76.10 o 
  14   2   8       42.12       53.89     96.82 o 
   1   3   8      401.52      401.94     22.35 o 
   2   3   8     5775.72     5594.45     79.98 o 
   3   3   8      646.35      623.38     28.35 o 
   4   3   8     4762.84     4820.44     76.13 o 
   5   3   8    19406.68    19175.06    254.72 o 
   6   3   8       75.90       34.20     27.13 o 
   7   3   8     1802.83     1834.68     50.64 o 
   8   3   8      183.27      168.12     38.11 o 
   9   3   8     6102.73     6055.64    125.09 o 
  10   3   8       42.97      109.05     53.23 o 
  11   3   8      197.77      107.74     65.13 o 
  12   3   8       12.00       42.20     69.78 o 
  13   3   8      188.29      116.18     80.62 o 
   0   4   8     2333.02     2507.71     80.88 o 
   1   4   8     2496.67     2438.03     49.78 o 
   2   4   8      121.42       95.80     26.07 o 
   3   4   8     3561.69     3644.21     63.33 o 
   4   4   8       54.82       40.85     28.35 o 
   5   4   8        7.00      -28.90     28.90 o 
   6   4   8     1357.86     1331.72     47.61 o 
   7   4   8      265.67      268.91     47.45 o 
   8   4   8      759.93      837.68     52.85 o 
   9   4   8      111.71       89.69     50.34 o 
  10   4   8       26.73      -37.74     67.28 o 
  11   4   8      151.56      144.05     62.73 o 
  12   4   8      114.77      108.97     71.77 o 
   1   5   8     3397.03     3449.00     80.86 o 
   2   5   8        0.03      -18.32     26.19 o 
   3   5   8      668.92      722.90     39.33 o 
   4   5   8        8.38       28.28     36.61 o 
   5   5   8     1351.32     1367.74     67.91 o 
   6   5   8      863.68      858.55     54.24 o 
   7   5   8     3905.17     3872.07    108.29 o 
   8   5   8        2.33       62.45     76.59 o 
   9   5   8       76.26      101.65     61.56 o 
  10   5   8       19.34       -6.17     73.48 o 
  11   5   8      415.42      549.16     90.13 o 
   0   6   8      630.64      615.35     53.95 o 
   1   6   8     1112.98     1155.12     62.80 o 
   2   6   8      248.45      266.29     55.84 o 
   3   6   8       10.81      -22.60     37.08 o 
   4   6   8      144.93      143.09     45.87 o 
   5   6   8      148.99       58.19     61.90 o 
   6   6   8      146.56      116.70     85.30 o 
   7   6   8      103.43      112.30     90.93 o 
   8   6   8      302.59      321.11    127.75 o 
   9   6   8       14.89       30.06    102.25 o 
  10   6   8        2.60       70.67    121.89 o 
   1   7   8      980.12      819.32    142.96 o 
   2   7   8        5.03       -0.10     72.74 o 
   3   7   8      447.17      457.77    107.29 o 
   4   7   8      270.05      313.81    110.33 o 
   5   7   8      144.39      199.08     86.08 o 
   6   7   8      100.19      -22.79     92.95 o 
   7   7   8      264.30      301.60    104.19 o 
   0   8   8      101.56      -21.19    250.11 o 
   1   8   8       16.81       34.02    190.33 o 
   2   8   8      553.91      272.24    355.59 o 
   3   8   8      266.10      184.66    198.93 o 
   1   1   9      629.11      620.47     22.52 o 
   2   1   9       79.88       52.94     22.39 o 
   3   1   9    11897.41    11561.23    171.18 o 
   4   1   9     2885.74     2968.90     57.37 o 
   5   1   9    19375.69    19565.48    302.06 o 
   6   1   9     4382.31     4540.57     83.77 o 
   7   1   9     7782.58     7974.99    149.12 o 
   8   1   9       69.84       31.43     38.42 o 
   9   1   9     2729.84     2776.87     88.31 o 
  10   1   9       10.30       -4.44     51.61 o 
  11   1   9     1289.11     1250.24     70.10 o 
  12   1   9        2.58      -11.10     69.01 o 
  13   1   9       43.38      -25.16     76.20 o 
  14   1   9        0.06      -65.41     95.78 o 
   0   2   9     2775.75     2883.01     71.46 o 
   1   2   9     1292.32     1353.66     33.11 o 
   2   2   9     6881.39     6720.51     96.25 o 
   3   2   9     2598.92     2793.67     49.59 o 
   4   2   9      277.85      306.07     25.32 o 
   5   2   9     9172.30     8916.58    128.30 o 
   6   2   9      387.44      348.48     29.67 o 
   7   2   9      637.53      650.15     35.26 o 
   8   2   9      253.89      328.64     38.36 o 
   9   2   9     1982.09     2026.21     78.15 o 
  10   2   9      274.80      276.06     59.06 o 
  11   2   9     1073.48     1145.21     73.17 o 
  12   2   9      443.26      450.72     72.18 o 
  13   2   9       97.78       80.44     85.99 o 
  14   2   9       45.70      -23.88     94.30 o 
   1   3   9     1155.76     1218.48     33.42 o 
   2   3   9        0.06        2.75     24.22 o 
   3   3   9     3348.52     3428.44     58.47 o 
   4   3   9        0.31      -23.86     24.27 o 
   5   3   9      658.66      788.55     33.19 o 
   6   3   9      487.37      483.29     31.43 o 
   7   3   9       15.08       10.45     31.73 o 
   8   3   9       15.26      -39.17     39.17 o 
   9   3   9       12.01      -16.28     50.13 o 
  10   3   9       66.52      -14.46     56.31 o 
  11   3   9        4.75       59.44     76.36 o 
  12   3   9      166.29      118.17     73.46 o 
  13   3   9      334.46      141.38     79.92 o 
   0   4   9     2430.95     2415.81     75.15 o 
   1   4   9      389.37      352.98     29.22 o 
   2   4   9      577.50      530.43     39.26 o 
   3   4   9       66.40       85.40     28.75 o 
   4   4   9      901.06      899.36     36.32 o 
   5   4   9      193.95      117.06     31.24 o 
   6   4   9      873.31      893.26     44.97 o 
   7   4   9      321.04      287.05     45.65 o 
   8   4   9      324.03      308.92     52.43 o 
   9   4   9      483.93      533.41     56.11 o 
  10   4   9     1359.05     1407.68     96.78 o 
  11   4   9      564.55      582.78     71.87 o 
  12   4   9      106.33       46.03     72.90 o 
   1   5   9     1020.03     1036.20     45.04 o 
   2   5   9      563.75      608.79     35.86 o 
   3   5   9        0.54       30.11     31.20 o 
   4   5   9      124.56      131.81     33.72 o 
   5   5   9      333.24      351.39     45.41 o 
   6   5   9      912.87      929.78     49.34 o 
   7   5   9     1510.19     1573.50     97.10 o 
   8   5   9      279.72      333.16     55.33 o 
   9   5   9       23.57       41.64     58.71 o 
  10   5   9        0.01      -11.45     75.21 o 
  11   5   9        3.58      -51.05     87.09 o 
   0   6   9      966.70     1016.01     84.12 o 
   1   6   9      152.96      116.11     47.91 o 
   2   6   9      164.63      161.90     50.23 o 
   3   6   9     1012.65     1059.45     65.97 o 
   4   6   9      759.23      786.31     51.91 o 
   5   6   9      379.78      380.60    102.23 o 
   6   6   9       22.55      -50.22     82.20 o 
   7   6   9      279.11       31.77     91.75 o 
   8   6   9      282.48      356.84    100.84 o 
   9   6   9      309.54      409.60    107.79 o 
   1   7   9        1.39       69.74     67.93 o 
   2   7   9      177.79      179.75    121.98 o 
   3   7   9      434.74      615.80    110.34 o 
   4   7   9     1086.71      896.86    121.92 o 
   5   7   9      432.08      403.55     92.82 o 
   6   7   9        0.56      -36.63     94.94 o 
   7   7   9       11.44       40.89    102.50 o 
   0   8   9      191.17      457.29    278.59 o 
   1   8   9      375.35      429.27    194.85 o 
   2   8   9       24.12      208.45    198.94 o 
   0   0  10      630.16      599.85     47.30 o 
   1   0  10     3516.40     3267.49     74.82 o 
   2   0  10    43858.42    42926.11    805.58 o 
   3   0  10      130.52      137.06     34.57 o 
   4   0  10      110.65        0.47     40.85 o 
   5   0  10    22201.53    23334.43    550.01 o 
   6   0  10     2310.14     2432.11     91.61 o 
   7   0  10      264.09      326.40     67.55 o 
   8   0  10       93.71       93.65     66.59 o 
   9   0  10      302.02      385.25     63.69 o 
  10   0  10       88.37      102.49     65.65 o 
  11   0  10      336.07      455.83     72.21 o 
  12   0  10     1100.46     1075.34    130.28 o 
  13   0  10      336.31       63.92    126.54 o 
  14   0  10      326.96      365.93    156.68 o 
   1   1  10     7778.27     7657.04    106.88 o 
   2   1  10      391.24      477.58     28.66 o 
   3   1  10      300.02      273.36     26.32 o 
   4   1  10    16057.53    15811.96    231.01 o 
   5   1  10     1527.53     1671.39     45.43 o 
   6   1  10      533.11      522.80     41.20 o 
   7   1  10       29.66      -30.09     30.09 o 
   8   1  10      154.66       77.58     40.13 o 
   9   1  10      893.06      862.76     48.73 o 
  10   1  10       35.47      -13.65     54.65 o 
  11   1  10      330.86      389.11     62.09 o 
  12   1  10        5.83      -70.97     70.97 o 
  13   1  10       24.46      -36.16     79.84 o 
  14   1  10       36.68       62.20     98.41 o 
   0   2  10    13181.23    13638.35    265.44 o 
   1   2  10      254.23      286.32     23.69 o 
   2   2  10      280.68      212.72     27.47 o 
   3   2  10     3475.40     3259.51     57.75 o 
   4   2  10     5305.49     5122.77     82.55 o 
   5   2  10     1165.06     1240.82     35.43 o 
   6   2  10      122.63       89.08     29.19 o 
   7   2  10     1780.93     1811.28     48.73 o 
   8   2  10      114.99      148.73     31.49 o 
   9   2  10      542.61      570.12     50.89 o 
  10   2  10      416.17      360.00     59.83 o 
  11   2  10       50.85       55.13     65.45 o 
  12   2  10      733.39      763.99     77.75 o 
  13   2  10      139.78      124.98     85.41 o 
  14   2  10      151.04       57.36     95.90 o 
   1   3  10      331.22      263.28     23.84 o 
   2   3  10    10476.14    10495.73    145.62 o 
   3   3  10     7299.88     7403.33    104.77 o 
   4   3  10      922.73      918.31     32.16 o 
   5   3  10      832.52      883.02     35.19 o 
   6   3  10      205.36      139.64     32.99 o 
   7   3  10        1.39      -10.43     33.72 o 
   8   3  10      534.35      621.27     43.13 o 
   9   3  10       77.45       23.55     44.94 o 
  10   3  10      200.76      162.26     54.55 o 
  11   3  10      122.38      177.85     69.30 o 
  12   3  10       12.67      -71.82     71.82 o 
  13   3  10      242.58      192.79     82.38 o 
   0   4  10     2361.16     2607.58     78.77 o 
   1   4  10      987.11     1037.75     46.04 o 
   2   4  10      213.38      204.44     33.73 o 
   3   4  10       33.41        8.40     30.76 o 
   4   4  10      126.14      128.22     33.79 o 
   5   4  10        2.60      -13.98     32.93 o 
   6   4  10     1819.00     1803.82     59.57 o 
   7   4  10      343.84      196.83     47.45 o 
   8   4  10      873.34      836.18     60.58 o 
   9   4  10      713.40      683.87     58.46 o 
  10   4  10      240.59      297.77     55.55 o 
  11   4  10     1017.73     1140.71     88.40 o 
  12   4  10       18.52       22.18     74.26 o 
   1   5  10      958.73      920.49     48.90 o 
   2   5  10     1150.14     1152.76     45.51 o 
   3   5  10      397.06      385.82     38.08 o 
   4   5  10      391.31      347.40     47.58 o 
   5   5  10        4.43      -24.28     37.03 o 
   6   5  10       17.19       22.39     40.51 o 
   7   5  10      360.91      247.29     49.23 o 
   8   5  10      231.69      265.37     61.01 o 
   9   5  10      134.54      186.37     74.55 o 
  10   5  10      972.34     1107.64     91.31 o 
  11   5  10      597.14      620.99     99.86 o 
   0   6  10       36.52      -20.82     59.16 o 
   1   6  10      568.29      619.13     53.84 o 
   2   6  10      417.26      433.16     68.03 o 
   3   6  10       71.10       86.21     42.75 o 
   4   6  10       26.09       39.16     51.77 o 
   5   6  10      200.82        9.27     82.65 o 
   6   6  10       21.49      -28.20     86.24 o 
   7   6  10      358.49      386.87     98.96 o 
   8   6  10       94.03      -19.62     97.86 o 
   9   6  10       35.84       64.45    105.23 o 
   1   7  10        3.30       38.45     66.61 o 
   2   7  10      142.76      -51.89     87.42 o 
   3   7  10        5.32      -36.87    103.47 o 
   4   7  10       33.46       53.41    110.31 o 
   5   7  10        8.75      -61.42     88.86 o 
   6   7  10       45.04       93.07     95.72 o 
   7   7  10       45.53      140.31    125.30 o 
   0   8  10      287.92       80.58    272.24 o 
   1   8  10        7.37       43.66    160.25 o 
   1   1  11    17101.49    16786.44    217.07 o 
   2   1  11      221.27      254.28     26.13 o 
   3   1  11      373.86      314.99     27.90 o 
   4   1  11      381.10      371.22     31.67 o 
   5   1  11     1892.77     1859.58     49.30 o 
   6   1  11      657.93      741.84     50.98 o 
   7   1  11      682.86      715.94     41.47 o 
   8   1  11     1419.79     1439.67     75.43 o 
   9   1  11       46.18       48.47     51.85 o 
  10   1  11     1290.12     1492.61     73.90 o 
  11   1  11        5.03       22.76     57.25 o 
  12   1  11      780.89      869.86     78.82 o 
  13   1  11        1.01      -76.75     76.75 o 
  14   1  11      184.14      265.11     96.33 o 
   0   2  11     2042.44     2133.45     96.11 o 
   1   2  11     5676.99     5622.76     87.13 o 
   2   2  11       17.87      -18.13     22.39 o 
   3   2  11     2543.41     2783.47     53.28 o 
   4   2  11      318.53      257.79     29.05 o 
   5   2  11      993.92      917.48     32.56 o 
   6   2  11     1671.93     1814.27     48.22 o 
   7   2  11      600.24      589.45     36.71 o 
   8   2  11      174.02      153.20     35.05 o 
   9   2  11      546.28      510.43     67.50 o 
  10   2  11      139.36      118.98     55.76 o 
  11   2  11       30.79      -62.13     62.13 o 
  12   2  11       69.13       27.99     70.39 o 
  13   2  11      350.19      220.04     88.36 o 
   1   3  11        4.83       16.80     23.97 o 
   2   3  11       52.53       51.51     27.55 o 
   3   3  11     1395.43     1408.64     40.56 o 
   4   3  11        0.90      -27.69     28.34 o 
   5   3  11     1625.08     1665.51     47.33 o 
   6   3  11      293.87      323.06     38.48 o 
   7   3  11     4019.66     4272.89     83.97 o 
   8   3  11      356.87      410.68     41.13 o 
   9   3  11       74.89       70.84     46.34 o 
  10   3  11      416.01      466.51     58.52 o 
  11   3  11      258.80      347.81     66.24 o 
  12   3  11       77.21       80.65     76.31 o 
  13   3  11      381.29      214.74     84.52 o 
   0   4  11       32.66       72.82     38.22 o 
   1   4  11     6666.28     6651.67    113.58 o 
   2   4  11     4786.34     4908.22     93.50 o 
   3   4  11        8.43        2.39     31.16 o 
   4   4  11     2925.17     3055.98     72.25 o 
   5   4  11      545.86      511.29     42.89 o 
   6   4  11      501.61      563.49     41.73 o 
   7   4  11      108.09      157.67     42.16 o 
   8   4  11      467.16      469.83     51.80 o 
   9   4  11       32.53       29.90     60.95 o 
  10   4  11      583.04      604.67     61.57 o 
  11   4  11      242.88      319.99     70.39 o 
  12   4  11      360.40      372.55     84.33 o 
   1   5  11     1812.40     1707.76     58.25 o 
   2   5  11        2.13      -33.85     37.65 o 
   3   5  11       16.41       10.55     37.51 o 
   4   5  11       68.70       78.18     38.78 o 
   5   5  11     1901.59     1858.86     58.68 o 
   6   5  11        4.45      -42.84     42.84 o 
   7   5  11      926.41      869.24     74.86 o 
   8   5  11      165.47      192.32     62.35 o 
   9   5  11      675.79      784.08     95.59 o 
  10   5  11       43.18       52.30     83.86 o 
  11   5  11        0.16       -5.09     88.00 o 
   0   6  11     3345.41     3374.09    117.53 o 
   1   6  11      549.03      526.92     48.02 o 
   2   6  11      758.41      726.66     67.38 o 
   3   6  11      866.93      952.32     50.48 o 
   4   6  11     1807.60     1886.98     86.94 o 
   5   6  11      447.02      326.64     79.90 o 
   6   6  11      187.93      282.00     91.95 o 
   7   6  11       54.74      154.20     93.05 o 
   8   6  11      198.54      161.84    103.50 o 
   9   6  11      506.24      386.81    119.77 o 
   1   7  11      264.43      282.57     92.05 o 
   2   7  11      288.38      399.74     96.36 o 
   3   7  11      260.30      356.95    100.89 o 
   4   7  11        4.76       -3.90     69.80 o 
   5   7  11        4.60       41.80     91.70 o 
   6   7  11       75.19       46.76     99.20 o 
   0   0  12    25295.35    23641.83    549.31 o 
   1   0  12     2430.68     2543.20     64.87 o 
   2   0  12      284.99      226.42     41.43 o 
   3   0  12     2065.65     2107.46     64.10 o 
   4   0  12     1989.13     1883.17     66.92 o 
   5   0  12     1986.95     2026.34    120.19 o 
   6   0  12     2626.12     2505.25    104.15 o 
   7   0  12      407.10      452.92     55.91 o 
   8   0  12     9382.37     9294.60    289.78 o 
   9   0  12      229.81      204.53     78.75 o 
  10   0  12     4870.76     4621.52    161.46 o 
  11   0  12        7.31      -73.19     96.19 o 
  12   0  12      177.37       95.52    103.30 o 
  13   0  12       36.64        2.32    115.53 o 
  14   0  12      138.99      108.24    131.25 o 
   1   1  12      648.07      661.57     27.11 o 
   2   1  12       63.50       70.36     25.09 o 
   3   1  12      774.81      774.15     33.09 o 
   4   1  12     3023.33     2952.14     60.41 o 
   5   1  12      637.12      649.45     36.29 o 
   6   1  12      741.85      717.64     42.28 o 
   7   1  12      222.06      211.96     36.68 o 
   8   1  12     1132.68      979.09     56.16 o 
   9   1  12      292.83      340.16     48.11 o 
  10   1  12     2378.73     2213.72     75.88 o 
  11   1  12      509.58      396.13     65.71 o 
  12   1  12        3.44      -38.82     71.27 o 
  13   1  12       54.24       67.70     81.47 o 
  14   1  12      693.25      557.59    103.39 o 
   0   2  12     9806.26     9804.97    187.86 o 
   1   2  12     1061.86     1215.13     34.47 o 
   2   2  12    11882.59    11930.62    163.72 o 
   3   2  12     1804.04     1930.33     41.94 o 
   4   2  12       25.55       47.95     28.40 o 
   5   2  12      644.26      699.00     47.55 o 
   6   2  12     3579.44     3449.29     68.50 o 
   7   2  12      510.32      569.41     38.09 o 
   8   2  12     2149.59     2319.77     65.38 o 
   9   2  12       57.77       42.50     40.23 o 
  10   2  12       30.17      -27.72     50.07 o 
  11   2  12      122.62      100.70     64.24 o 
  12   2  12      539.69      455.69     81.01 o 
  13   2  12       23.72      -17.03     87.89 o 
   1   3  12      661.97      727.91     33.88 o 
   2   3  12     5398.01     5250.36     83.05 o 
   3   3  12      290.41      303.00     29.83 o 
   4   3  12        2.65       35.66     30.96 o 
   5   3  12        8.52      -18.92     33.10 o 
   6   3  12        0.37      -28.39     35.20 o 
   7   3  12      369.58      383.06     41.42 o 
   8   3  12     1773.96     1857.19     57.11 o 
   9   3  12      501.85      444.06     49.74 o 
  10   3  12        0.09      -42.47     57.06 o 
  11   3  12        0.03      -14.16     67.67 o 
  12   3  12     2183.09     2436.58    106.98 o 
  13   3  12        0.05       28.51     91.90 o 
   0   4  12     3378.60     3285.41     97.49 o 
   1   4  12        0.49       -3.06     34.29 o 
   2   4  12     2795.67     2858.42     71.91 o 
   3   4  12       39.70       99.69     35.27 o 
   4   4  12     2724.56     2655.49     63.97 o 
   5   4  12      105.48       50.87     40.70 o 
   6   4  12       30.58       26.76     42.06 o 
   7   4  12      673.33      640.41     48.04 o 
   8   4  12      148.76      127.01     48.00 o 
   9   4  12       72.00       14.34     70.75 o 
  10   4  12        7.08      -55.56     55.56 o 
  11   4  12      280.10      281.30     71.19 o 
  12   4  12       84.65      -54.49     82.10 o 
   1   5  12       81.51       31.95     41.60 o 
   2   5  12      568.10      679.50     58.21 o 
   3   5  12       15.97      -42.54     42.54 o 
   4   5  12       11.68      -40.29     40.29 o 
   5   5  12     1130.73     1195.46     52.65 o 
   6   5  12     1466.07     1417.87     80.83 o 
   7   5  12      288.72      301.57     60.08 o 
   8   5  12       50.03      -40.76     71.30 o 
   9   5  12       48.64       38.20     79.58 o 
  10   5  12      572.53      591.25     91.42 o 
   0   6  12       69.49       54.84     67.40 o 
   1   6  12       17.31      -46.36     46.36 o 
   2   6  12       33.77       18.59     45.96 o 
   3   6  12      184.70      168.08     41.90 o 
   4   6  12        0.23      -45.08     64.96 o 
   5   6  12       58.56       30.82     77.82 o 
   6   6  12       55.52      -57.54     78.44 o 
   7   6  12      141.06      206.33     98.86 o 
   8   6  12      145.55      164.95    114.91 o 
   9   6  12        4.58      -18.80    116.74 o 
   1   7  12        0.37        2.61    102.07 o 
   2   7  12       50.29        8.11     94.17 o 
   3   7  12      118.71      187.75    102.40 o 
   4   7  12        0.55        3.31     69.55 o 
   5   7  12        9.70      -54.84    113.63 o 
   6   7  12        9.97     -101.52    101.52 o 
   1   1  13    13200.32    12721.14    164.04 o 
   2   1  13      123.69       99.18     26.67 o 
   3   1  13       63.46       98.25     29.28 o 
   4   1  13      622.60      661.42     36.53 o 
   5   1  13     1420.12     1434.73     47.99 o 
   6   1  13      981.28     1056.74     48.05 o 
   7   1  13     1600.16     1550.06     75.88 o 
   8   1  13      231.86      208.93     40.54 o 
   9   1  13      324.40      270.39     51.71 o 
  10   1  13      144.96      310.90     63.12 o 
  11   1  13      255.33      123.67     66.51 o 
  12   1  13      401.34      364.56     75.10 o 
  13   1  13       90.17       -8.33     79.71 o 
   0   2  13       17.15       39.18     35.01 o 
   1   2  13     4176.54     4584.45     75.26 o 
   2   2  13      340.32      357.85     28.95 o 
   3   2  13      116.05       63.89     27.22 o 
   4   2  13     1160.08     1372.01     41.62 o 
   5   2  13     7944.45     7676.22    129.93 o 
   6   2  13     1477.02     1516.60     45.00 o 
   7   2  13     2187.93     2116.32     57.32 o 
   8   2  13      214.64      191.30     38.65 o 
   9   2  13      780.10      861.28     45.14 o 
  10   2  13      292.22      312.90     55.19 o 
  11   2  13      365.23      456.88     73.91 o 
  12   2  13        0.10       23.81     77.39 o 
  13   2  13      143.79       86.19    107.11 o 
   1   3  13      720.42      774.10     44.26 o 
   2   3  13      174.49      162.87     32.34 o 
   3   3  13     2582.93     2472.53     55.91 o 
   4   3  13     1656.51     1742.75     50.16 o 
   5   3  13      255.68      267.55     36.96 o 
   6   3  13      658.96      714.71     42.93 o 
   7   3  13      387.48      440.82     43.51 o 
   8   3  13      693.27      691.89     46.02 o 
   9   3  13       82.09       37.82     43.60 o 
  10   3  13        7.31      -57.62     57.62 o 
  11   3  13     1120.26     1230.11     80.73 o 
  12   3  13       13.53       64.13     85.83 o 
   0   4  13     1041.87     1175.56     62.35 o 
   1   4  13       41.12      -18.69     32.14 o 
   2   4  13     3176.73     3084.31     76.52 o 
   3   4  13      354.30      337.88     38.41 o 
   4   4  13      178.48      149.24     38.40 o 
   5   4  13      268.98      262.00     43.07 o 
   6   4  13     1489.66     1490.64     73.62 o 
   7   4  13      213.30      201.75     46.47 o 
   8   4  13      708.71      716.50     55.37 o 
   9   4  13       82.06       35.84     54.90 o 
  10   4  13       59.08      -62.63     64.18 o 
  11   4  13      149.14      115.17     73.75 o 
   1   5  13       84.27       64.28     38.78 o 
   2   5  13      452.12      449.38     53.05 o 
   3   5  13     1269.48     1292.12     51.40 o 
   4   5  13      328.75      259.72     44.42 o 
   5   5  13      530.46      518.87     47.43 o 
   6   5  13      271.04      329.81     56.60 o 
   7   5  13      112.43      131.98     65.78 o 
   8   5  13      274.99      250.85     77.19 o 
   9   5  13      259.25      242.94     82.65 o 
  10   5  13       34.67      -85.11     85.11 o 
   0   6  13     4920.25     5140.41    173.08 o 
   1   6  13       34.35       25.27     51.58 o 
   2   6  13      129.34      134.20     55.15 o 
   3   6  13      124.55      209.40     50.13 o 
   4   6  13      342.64      426.83     60.69 o 
   5   6  13      524.15      404.64     68.53 o 
   6   6  13       16.25       -1.33     82.79 o 
   7   6  13        1.53       24.89    108.94 o 
   8   6  13      352.47      176.38    128.97 o 
   1   7  13       67.08       20.33     72.48 o 
   2   7  13      104.38      121.49    100.63 o 
   3   7  13       48.37        6.34    105.47 o 
   4   7  13       20.44       -1.57     78.71 o 
   5   7  13      216.56      196.35     90.10 o 
   6   7  13       48.65      -41.34    104.03 o 
   0   0  14    16383.44    17090.76    403.83 o 
   1   0  14    44615.31    46309.81    868.67 o 
   2   0  14      650.85      640.33     40.96 o 
   3   0  14        0.21       -3.06     38.06 o 
   4   0  14     5851.40     5929.04    140.19 o 
   5   0  14     2804.58     2778.08     95.11 o 
   6   0  14       61.08      107.16     63.24 o 
   7   0  14     1003.23     1123.83    107.47 o 
   8   0  14     1781.54     1799.60     85.09 o 
   9   0  14       33.91       33.38     86.53 o 
  10   0  14       21.87       -5.46     90.59 o 
  11   0  14      266.17       70.09    142.67 o 
  12   0  14       29.83       68.83    105.50 o 
  13   0  14      127.19      121.46    113.57 o 
   1   1  14     1565.65     1631.37     37.05 o 
   2   1  14     7131.78     7278.92    104.90 o 
   3   1  14      831.11      898.09     37.61 o 
   4   1  14      347.88      354.95     34.95 o 
   5   1  14     4377.52     4263.28     87.45 o 
   6   1  14     1681.08     1740.80     72.04 o 
   7   1  14     1456.64     1508.15     61.52 o 
   8   1  14      190.19      278.32     44.89 o 
   9   1  14       48.95       -5.98     50.55 o 
  10   1  14      181.68      192.28     80.40 o 
  11   1  14       61.81      122.27     68.34 o 
  12   1  14      398.22      269.89     79.49 o 
  13   1  14        0.39      -15.14     83.50 o 
   0   2  14      112.71      172.41     38.05 o 
   1   2  14    11444.66    11614.76    156.35 o 
   2   2  14      751.57      948.53     35.06 o 
   3   2  14     4528.23     4527.16     80.84 o 
   4   2  14     1344.64     1307.72     45.86 o 
   5   2  14     1097.43     1100.98     45.13 o 
   6   2  14      135.49      101.43     46.50 o 
   7   2  14       29.79       38.44     36.40 o 
   8   2  14       13.87      -24.56     38.38 o 
   9   2  14       24.97       57.32     40.75 o 
  10   2  14        4.91      -31.92     55.17 o 
  11   2  14      391.30      424.75     74.67 o 
  12   2  14        4.67       15.28     77.73 o 
  13   2  14     1680.16     1681.17    110.65 o 
   1   3  14     8510.44     8663.75    159.05 o 
   2   3  14     3144.08     3134.41     75.42 o 
   3   3  14     1395.16     1360.32     56.59 o 
   4   3  14     1123.50     1061.79     44.15 o 
   5   3  14      285.41      329.91     39.24 o 
   6   3  14       62.45       91.76     41.19 o 
   7   3  14     1107.19     1083.24     51.15 o 
   8   3  14       54.39        6.56     45.43 o 
   9   3  14      242.21      268.35     50.13 o 
  10   3  14       37.00       29.31     60.62 o 
  11   3  14      135.60       83.22     70.77 o 
  12   3  14       19.13       26.28     94.71 o 
   0   4  14     1572.31     1642.77     72.35 o 
   1   4  14       19.75       -1.17     34.52 o 
   2   4  14       25.98       -9.26     39.12 o 
   3   4  14     3586.76     3613.32     78.84 o 
   4   4  14      569.73      528.74     42.08 o 
   5   4  14        4.57      -14.49     42.80 o 
   6   4  14       60.09       50.82     46.05 o 
   7   4  14      833.69      748.93     53.96 o 
   8   4  14        8.32       45.53     54.26 o 
   9   4  14      564.74      528.93     58.31 o 
  10   4  14       74.74      -41.42     65.86 o 
  11   4  14       39.71       76.51     73.04 o 
   1   5  14      364.26      478.83     44.86 o 
   2   5  14       51.99       22.46     44.02 o 
   3   5  14      135.42      131.35     41.51 o 
   4   5  14        6.14       -9.42     43.18 o 
   5   5  14      911.20      968.73     52.86 o 
   6   5  14      540.29      443.57     61.90 o 
   7   5  14      311.83      324.96     68.65 o 
   8   5  14      254.14      140.59     70.36 o 
   9   5  14      198.06      150.11     84.73 o 
  10   5  14        3.03       46.51     90.05 o 
   0   6  14      780.33      777.47    134.84 o 
   1   6  14       27.00      -22.74     61.84 o 
   2   6  14      108.62       62.98     61.24 o 
   3   6  14       69.97       31.74     54.35 o 
   4   6  14      120.26      125.26     64.54 o 
   5   6  14      116.04       85.47     94.12 o 
   6   6  14       54.48        2.21     75.02 o 
   7   6  14       25.32      -23.57     75.51 o 
   8   6  14       31.37      -56.18     86.74 o 
   1   7  14        0.90       -7.94     79.69 o 
   2   7  14       67.53       93.69    104.78 o 
   3   7  14      114.79      -24.55    105.65 o 
   4   7  14       30.71      -20.16     98.85 o 
   5   7  14       69.45      156.39     92.33 o 
   1   1  15        1.54      -12.79     24.68 o 
   2   1  15     5112.67     5123.21     80.83 o 
   3   1  15     7988.61     7764.02    122.70 o 
   4   1  15     2856.99     2914.39     83.55 o 
   5   1  15     8247.96     7946.56    146.49 o 
   6   1  15       14.13      -17.00     43.32 o 
   7   1  15      550.24      536.47     53.21 o 
   8   1  15      221.92      168.55     45.87 o 
   9   1  15      302.88      312.09     56.65 o 
  10   1  15     1308.35     1491.56     86.91 o 
  11   1  15      738.58      646.30     77.82 o 
  12   1  15      488.04      609.03     84.46 o 
  13   1  15      303.87      275.39     87.94 o 
   0   2  15       16.54      -20.68     39.08 o 
   1   2  15        5.26        2.22     26.69 o 
   2   2  15     1768.99     1796.38     47.96 o 
   3   2  15      643.67      713.30     41.36 o 
   4   2  15      667.12      637.17     42.37 o 
   5   2  15      167.80      183.92     43.06 o 
   6   2  15      404.69      380.94     44.73 o 
   7   2  15       18.79      -41.59     41.59 o 
   8   2  15      458.35      447.71     44.63 o 
   9   2  15       14.38       31.99     43.43 o 
  10   2  15      943.55     1092.81     79.52 o 
  11   2  15        2.87       59.29     74.62 o 
  12   2  15       25.43        9.92     87.63 o 
  13   2  15      172.02      143.90     95.67 o 
   1   3  15     2440.40     2446.65     81.08 o 
   2   3  15      834.45      904.02     47.50 o 
   3   3  15      644.18      571.53     39.57 o 
   4   3  15      313.78      213.60     38.87 o 
   5   3  15      103.01      121.01     39.95 o 
   6   3  15      336.45      302.70     43.64 o 
   7   3  15      761.83      746.88     49.52 o 
   8   3  15       39.93       46.53     47.60 o 
   9   3  15       32.64      -48.25     48.25 o 
  10   3  15      285.19      364.92     64.59 o 
  11   3  15      210.84      269.21     90.40 o 
  12   3  15       12.18       50.42     96.16 o 
   0   4  15        1.80       -2.20     52.81 o 
   1   4  15     1079.05     1177.27     50.56 o 
   2   4  15     3277.86     3311.85     87.24 o 
   3   4  15     1404.73     1382.30     51.90 o 
   4   4  15        8.27      -16.19     44.33 o 
   5   4  15      488.33      427.46     48.56 o 
   6   4  15       47.77       39.84     47.32 o 
   7   4  15       28.21      -14.64     49.34 o 
   8   4  15      736.52      790.34     60.52 o 
   9   4  15     1095.51     1181.60     73.34 o 
  10   4  15       26.29       11.88     68.20 o 
  11   4  15      244.85      222.04     85.38 o 
   1   5  15      690.02      627.89     49.19 o 
   2   5  15      953.16     1094.16     55.04 o 
   3   5  15      367.87      426.45     46.42 o 
   4   5  15       81.35       85.19     45.21 o 
   5   5  15        0.05       22.53     63.46 o 
   6   5  15      327.03      504.49     70.06 o 
   7   5  15       77.85       -0.52     67.49 o 
   8   5  15      587.60      646.96     91.48 o 
   9   5  15      230.33      233.53     88.46 o 
  10   5  15       73.73       85.95     93.71 o 
   0   6  15     5584.57     5904.95    283.46 o 
   1   6  15      243.64      238.03     72.48 o 
   2   6  15      241.74       72.26     78.08 o 
   3   6  15        0.45       15.75     79.53 o 
   4   6  15      364.59      353.64     79.87 o 
   5   6  15       13.12      -14.87     77.48 o 
   6   6  15       61.75       -6.29     79.50 o 
   7   6  15       81.10       33.72     84.43 o 
   8   6  15      121.23        5.68     96.21 o 
   1   7  15      269.36      278.77     88.87 o 
   2   7  15      360.51      358.17     85.81 o 
   3   7  15        5.75      149.91    108.04 o 
   4   7  15      259.37      181.93     81.39 o 
   5   7  15        0.41       56.13    112.90 o 
   0   0  16      978.65      860.93     58.49 o 
   1   0  16      468.56      606.60     43.20 o 
   2   0  16      313.23      326.40     53.22 o 
   3   0  16      280.40      351.16     42.32 o 
   4   0  16    13494.71    13441.87    288.51 o 
   5   0  16     6026.53     5981.57    162.29 o 
   6   0  16       23.94      -66.81     66.81 o 
   7   0  16       26.46       22.97     76.63 o 
   8   0  16      132.28       91.17     92.16 o 
   9   0  16     2704.38     2660.22    127.57 o 
  10   0  16      391.59      329.68     94.34 o 
  11   0  16      711.41      769.94    109.05 o 
  12   0  16       16.22       51.29    107.56 o 
  13   0  16       17.01       70.88    119.45 o 
   1   1  16     5480.69     5512.75     83.51 o 
   2   1  16     5028.69     5297.80     83.56 o 
   3   1  16     2117.76     2203.32     64.19 o 
   4   1  16     1500.44     1632.48     69.25 o 
   5   1  16      240.69      280.11     39.02 o 
   6   1  16     1244.71     1222.03     74.80 o 
   7   1  16     1996.59     2136.46    103.21 o 
   8   1  16      199.60      249.69     55.52 o 
   9   1  16        2.10      -33.69     47.36 o 
  10   1  16     1150.26     1193.14     70.07 o 
  11   1  16      846.88      929.53    101.20 o 
  12   1  16        7.09      -41.42     80.55 o 
  13   1  16      251.69      190.30     90.68 o 
   0   2  16      127.20      170.67     42.71 o 
   1   2  16       80.16       94.22     30.45 o 
   2   2  16     4403.07     4396.36     85.41 o 
   3   2  16      580.07      701.51     43.25 o 
   4   2  16      987.40      940.49     46.92 o 
   5   2  16      986.79     1056.97     52.34 o 
   6   2  16     2548.49     2533.99     74.32 o 
   7   2  16      127.51       72.58     44.24 o 
   8   2  16      248.85      254.01     43.86 o 
   9   2  16        6.36        8.25     45.06 o 
  10   2  16      212.17      195.78     53.65 o 
  11   2  16      794.22      872.66     80.50 o 
  12   2  16      699.24      709.25    104.43 o 
   1   3  16      125.09      230.63     40.33 o 
   2   3  16      714.12      693.74     45.23 o 
   3   3  16       11.41      -35.02     35.02 o 
   4   3  16       49.76       44.21     41.00 o 
   5   3  16     2508.01     2525.01     66.06 o 
   6   3  16      369.82      334.31     44.73 o 
   7   3  16      453.28      482.86     49.72 o 
   8   3  16     1816.21     1752.07     66.56 o 
   9   3  16     3704.27     3697.66    106.41 o 
  10   3  16      509.52      497.23     98.53 o 
  11   3  16       42.93       88.63     90.38 o 
  12   3  16      168.20      151.19    100.56 o 
   0   4  16     1321.96     1286.17     70.60 o 
   1   4  16       98.36      156.26     40.02 o 
   2   4  16      829.95      857.70     50.98 o 
   3   4  16      426.57      491.04     49.73 o 
   4   4  16      427.02      428.41     49.48 o 
   5   4  16        2.14      -23.07     46.87 o 
   6   4  16      721.51      703.58     54.82 o 
   7   4  16     1266.48     1233.20     70.37 o 
   8   4  16     1022.30      964.30     69.15 o 
   9   4  16       30.64       27.17     65.06 o 
  10   4  16       66.56      109.08     73.59 o 
  11   4  16      681.25      707.09     92.71 o 
   1   5  16       41.32      -31.11     46.87 o 
   2   5  16       35.17        1.83     47.88 o 
   3   5  16     2239.03     2304.76     71.37 o 
   4   5  16        0.26       -5.62     51.03 o 
   5   5  16     1427.16     1355.68     82.22 o 
   6   5  16      149.74       68.13     69.03 o 
   7   5  16        2.85      -48.47     73.23 o 
   8   5  16      335.56      324.44     77.32 o 
   9   5  16       72.85       39.79     86.80 o 
   0   6  16       72.76      256.71    104.03 o 
   1   6  16       61.41       18.81     74.20 o 
   2   6  16      130.31      220.05     59.86 o 
   3   6  16      182.49      199.18     79.77 o 
   4   6  16      422.82      194.11     81.27 o 
   5   6  16       83.78      189.02     84.22 o 
   6   6  16      408.43      415.41     87.57 o 
   7   6  16      391.02      418.92     92.76 o 
   1   7  16      403.63      407.45     94.34 o 
   2   7  16       86.45      -64.82     90.20 o 
   3   7  16      764.30      761.88     94.63 o 
   4   7  16       82.69      171.19     87.30 o 
   1   1  17     1336.22     1363.78     44.64 o 
   2   1  17     7482.63     7360.22    112.15 o 
   3   1  17     1563.53     1612.55     48.11 o 
   4   1  17     6578.82     6432.86    120.55 o 
   5   1  17      730.52      813.53     44.52 o 
   6   1  17      284.60      352.10     56.39 o 
   7   1  17     2505.71     2448.86     82.67 o 
   8   1  17      726.18      824.03     70.49 o 
   9   1  17        4.76       47.63     51.61 o 
  10   1  17      105.81      173.44     63.31 o 
  11   1  17      234.32      244.45     82.31 o 
  12   1  17       20.63       25.08     82.28 o 
   0   2  17       48.06        5.97     44.98 o 
   1   2  17     8014.14     7647.01    138.51 o 
   2   2  17     4250.64     4273.43     87.99 o 
   3   2  17      831.76      898.93     55.74 o 
   4   2  17     1531.11     1563.75     61.83 o 
   5   2  17      156.45      112.11     46.48 o 
   6   2  17      266.89      244.42     49.38 o 
   7   2  17     1782.02     1741.85     63.41 o 
   8   2  17      542.34      477.71     53.51 o 
   9   2  17       55.40       69.85     50.18 o 
  10   2  17        5.33      -54.32     54.32 o 
  11   2  17      437.06      417.86     88.66 o 
  12   2  17      531.50      281.09    101.76 o 
   1   3  17      676.09      766.53     73.19 o 
   2   3  17       34.09       66.19     39.55 o 
   3   3  17        1.85      -28.50     39.32 o 
   4   3  17      554.72      537.21     47.35 o 
   5   3  17      351.72      279.38     46.40 o 
   6   3  17       49.62       48.12     46.03 o 
   7   3  17      248.66      362.07     50.38 o 
   8   3  17       61.68      114.68     53.30 o 
   9   3  17      104.43      141.03     60.26 o 
  10   3  17      489.35      591.72     85.14 o 
  11   3  17       99.15       -9.36     91.69 o 
   0   4  17     3358.27     3499.38    127.49 o 
   1   4  17      892.66      931.41     71.51 o 
   2   4  17     1262.42     1219.64     52.88 o 
   3   4  17      825.92      878.60     61.23 o 
   4   4  17      278.92      321.71     50.23 o 
   5   4  17      158.50       49.63     51.11 o 
   6   4  17       64.84        4.04     50.96 o 
   7   4  17       30.84        0.10     53.01 o 
   8   4  17      124.93      123.55     58.23 o 
   9   4  17       31.14       21.11     69.49 o 
  10   4  17       87.89       85.57     74.39 o 
   1   5  17       43.12       27.71     48.75 o 
   2   5  17      255.55      321.91     52.99 o 
   3   5  17     1003.33     1061.72     93.72 o 
   4   5  17     1285.35     1201.57     78.91 o 
   5   5  17       20.24       72.20     68.42 o 
   6   5  17      118.42       26.64     70.25 o 
   7   5  17        0.38       69.42     76.19 o 
   8   5  17       29.17       32.94     78.69 o 
   9   5  17        0.28       11.33     89.73 o 
   0   6  17      852.14     1017.08    146.91 o 
   1   6  17       84.29       97.33     75.58 o 
   2   6  17      200.60      277.58     80.17 o 
   3   6  17      506.35      400.36    113.02 o 
   4   6  17       46.41      132.25     83.49 o 
   5   6  17      372.50      255.45    118.83 o 
   6   6  17      423.87      442.46     93.43 o 
   7   6  17       36.23      -20.41     91.50 o 
   1   7  17        3.68       15.31     94.52 o 
   2   7  17      278.68      278.78     95.88 o 
   3   7  17       93.55      195.28     95.06 o 
   0   0  18     4397.70     4294.73    169.41 o 
   1   0  18     1354.55     1416.61     61.94 o 
   2   0  18     3706.84     3392.13     88.43 o 
   3   0  18      212.14      182.65     55.35 o 
   4   0  18      728.54      652.61     54.07 o 
   5   0  18     3327.81     3398.42    151.14 o 
   6   0  18      259.66      257.74     89.99 o 
   7   0  18        2.52      -17.30     93.40 o 
   8   0  18     3702.11     3514.56    195.84 o 
   9   0  18       31.97        6.02     76.85 o 
  10   0  18      535.36      371.72    105.35 o 
  11   0  18      545.29      672.84    114.29 o 
  12   0  18      206.35       19.63    121.01 o 
   1   1  18      215.46      190.70     33.48 o 
   2   1  18      747.15      695.13     38.49 o 
   3   1  18      205.34      179.12     37.48 o 
   4   1  18     4102.58     4122.92     91.81 o 
   5   1  18     2192.39     2205.36     68.32 o 
   6   1  18       58.34       43.51     59.42 o 
   7   1  18      567.48      578.03     60.68 o 
   8   1  18      185.76      281.76     65.06 o 
   9   1  18     1383.27     1375.03     79.84 o 
  10   1  18      696.44      633.08     86.86 o 
  11   1  18      175.23      159.63     84.69 o 
  12   1  18       16.77      -84.14     84.14 o 
   0   2  18     4324.43     4064.64    117.03 o 
   1   2  18       18.58       11.77     33.15 o 
   2   2  18      582.90      760.40     46.60 o 
   3   2  18       81.77       48.25     41.12 o 
   4   2  18      680.55      630.90     49.58 o 
   5   2  18      164.75       99.21     49.12 o 
   6   2  18     1215.60     1285.13     62.97 o 
   7   2  18        1.26       -0.87     55.14 o 
   8   2  18      271.78      217.66     54.24 o 
   9   2  18     1003.33     1080.45     62.29 o 
  10   2  18      122.01      146.79     71.73 o 
  11   2  18        7.02      -14.75     88.42 o 
  12   2  18       96.53       31.92    102.99 o 
   1   3  18     1902.58     1880.46     64.39 o 
   2   3  18      189.19      161.78     42.66 o 
   3   3  18      392.86      517.39     46.21 o 
   4   3  18       12.98      -42.56     44.55 o 
   5   3  18     4977.73     4870.36    108.75 o 
   6   3  18     8862.15     8728.84    164.78 o 
   7   3  18     3326.74     3259.43     83.76 o 
   8   3  18      936.86      893.51     68.25 o 
   9   3  18       10.16      -60.84     60.84 o 
  10   3  18        0.87       38.17     81.09 o 
  11   3  18      117.12      -77.16     92.88 o 
   0   4  18     5152.74     5075.14    198.80 o 
   1   4  18      139.65      137.90     45.09 o 
   2   4  18     1113.12     1113.10     54.33 o 
   3   4  18      411.26      546.07     54.44 o 
   4   4  18      399.04      325.80     54.00 o 
   5   4  18      815.94      841.91     71.55 o 
   6   4  18       72.85       76.22     71.65 o 
   7   4  18        7.54      -32.78     56.35 o 
   8   4  18       19.90      -60.19     60.19 o 
   9   4  18        9.36      -21.80     71.90 o 
  10   4  18      253.18      206.85     79.12 o 
   1   5  18       19.67      -51.25     51.25 o 
   2   5  18        1.03      -15.94     56.40 o 
   3   5  18     1151.61     1261.67     81.65 o 
   4   5  18      565.37      641.01     74.63 o 
   5   5  18        0.10      -69.82     69.82 o 
   6   5  18      150.92      127.02     75.68 o 
   7   5  18       71.86       79.06     80.44 o 
   8   5  18      706.22      791.29     97.46 o 
   9   5  18       60.84      -38.49     96.45 o 
   0   6  18      227.65      -30.15    111.89 o 
   1   6  18        8.97       99.19     78.59 o 
   2   6  18       60.43      162.03     84.99 o 
   3   6  18        4.14      -12.27     84.76 o 
   4   6  18      158.46      165.70     88.66 o 
   5   6  18      107.40       17.41     90.24 o 
   6   6  18       25.99        8.11     89.95 o 
   1   7  18      356.70      345.70    107.96 o 
   2   7  18      142.29      291.60    103.40 o 
   1   1  19     2602.75     2661.75     59.18 o 
   2   1  19      860.48      921.05     44.63 o 
   3   1  19      729.42      768.32     45.77 o 
   4   1  19       24.34      -16.97     42.24 o 
   5   1  19      525.68      470.90     52.16 o 
   6   1  19      546.68      571.16     48.32 o 
   7   1  19     8686.82     8636.08    190.68 o 
   8   1  19      951.20     1129.04     74.49 o 
   9   1  19     2138.57     2286.33     94.46 o 
  10   1  19       17.08       14.37    105.22 o 
  11   1  19       43.27       82.82     88.10 o 
  12   1  19       60.16      177.59     90.26 o 
   0   2  19     1660.87     1641.53     87.81 o 
   1   2  19      783.34      829.79     44.02 o 
   2   2  19      446.45      482.35     44.61 o 
   3   2  19      107.92      139.91     46.20 o 
   4   2  19      340.12      340.84     62.58 o 
   5   2  19     1162.43     1140.78     61.30 o 
   6   2  19     1925.21     1930.44     73.24 o 
   7   2  19       72.95       50.66     59.09 o 
   8   2  19     2570.21     2491.62     92.04 o 
   9   2  19       90.31       97.87     63.75 o 
  10   2  19        2.25       19.44     72.11 o 
  11   2  19       21.13       59.64     89.63 o 
   1   3  19     2234.35     2279.99     84.69 o 
   2   3  19      118.72       89.52     43.43 o 
   3   3  19       34.16       48.33     44.94 o 
   4   3  19        0.01      -45.58     45.58 o 
   5   3  19     2659.57     2599.28    102.24 o 
   6   3  19     3109.29     3143.55     86.27 o 
   7   3  19      221.24      213.00     55.50 o 
   8   3  19      280.21      330.44     63.99 o 
   9   3  19      132.33       51.50     69.37 o 
  10   3  19       39.70       16.63     82.40 o 
  11   3  19       12.34      -60.84     98.72 o 
   0   4  19     1352.42     1447.08    119.46 o 
   1   4  19       32.70       -2.21     45.60 o 
   2   4  19      785.15      726.93     52.57 o 
   3   4  19       59.22       66.50     52.47 o 
   4   4  19       15.10       76.22     54.25 o 
   5   4  19      259.20      361.09     67.26 o 
   6   4  19     1549.49     1626.13     74.40 o 
   7   4  19      573.88      660.45     69.19 o 
   8   4  19     1171.59     1277.75     96.94 o 
   9   4  19        4.90      -11.97     76.47 o 
  10   4  19        0.08      -51.90     81.94 o 
   1   5  19        3.04       51.36     50.61 o 
   2   5  19      558.27      540.90     67.96 o 
   3   5  19      716.07      704.69     77.17 o 
   4   5  19      474.68      610.99     78.04 o 
   5   5  19      269.14      272.33     76.81 o 
   6   5  19       45.05       85.90     78.95 o 
   7   5  19        0.01      -74.91     81.47 o 
   8   5  19       42.71       78.24     90.86 o 
   0   6  19       11.18     -114.70    114.70 o 
   1   6  19      192.93      207.34     88.77 o 
   2   6  19      100.15      208.86     89.46 o 
   3   6  19       66.40      165.20     86.94 o 
   4   6  19        2.09       37.14     90.38 o 
   5   6  19       41.04       61.84     94.04 o 
   6   6  19       83.84       86.92     94.73 o 
   0   0  20     1833.58     1774.30    103.97 o 
   1   0  20     5124.59     5072.77    132.62 o 
   2   0  20       30.01      -67.58     67.58 o 
   3   0  20     6207.24     6374.38    158.64 o 
   4   0  20     5698.58     5633.58    155.32 o 
   5   0  20      853.03      877.09    105.47 o 
   6   0  20       23.23       -7.32     84.09 o 
   7   0  20     3586.27     3448.10    327.47 o 
   8   0  20       17.04      -50.85    102.29 o 
   9   0  20        6.81       18.00     81.92 o 
  10   0  20     1151.57     1111.82    161.20 o 
  11   0  20      896.24      871.32    125.48 o 
  12   0  20       59.61       -0.18    125.12 o 
   1   1  20      803.39      843.12     43.25 o 
   2   1  20       57.41       64.40     40.57 o 
   3   1  20       93.29      142.54     41.64 o 
   4   1  20      228.87      211.68     46.46 o 
   5   1  20      193.39      156.95     52.48 o 
   6   1  20      426.48      397.36     66.51 o 
   7   1  20       39.59      -19.61     51.57 o 
   8   1  20      503.39      506.45     68.10 o 
   9   1  20      151.47       63.89     66.27 o 
  10   1  20      374.67      319.39     83.51 o 
  11   1  20       62.71      -19.11     87.47 o 
   0   2  20      925.67      956.28     67.59 o 
   1   2  20     1472.43     1736.07     64.11 o 
   2   2  20       13.81        5.94     46.92 o 
   3   2  20     2591.89     2647.20     84.24 o 
   4   2  20      681.35      790.63     74.36 o 
   5   2  20     6358.84     6173.33    139.31 o 
   6   2  20      288.46      331.04     56.31 o 
   7   2  20       25.00      -23.90     58.63 o 
   8   2  20      109.77      156.47     66.52 o 
   9   2  20      316.23      215.06     67.31 o 
  10   2  20       72.02      -31.43     84.34 o 
  11   2  20      640.36      491.33    103.95 o 
   1   3  20     2568.19     2617.71     78.16 o 
   2   3  20       37.28        2.42     47.94 o 
   3   3  20      249.79      173.47     48.54 o 
   4   3  20     1172.41     1274.04     58.53 o 
   5   3  20      790.68      948.17     60.83 o 
   6   3  20      106.49       23.44     54.96 o 
   7   3  20      607.44      621.05     64.95 o 
   8   3  20      154.13       25.19     65.33 o 
   9   3  20      161.72      213.15     73.24 o 
  10   3  20       32.33      -93.26     93.26 o 
   0   4  20      137.74       39.05     67.42 o 
   1   4  20      289.99      260.55     49.80 o 
   2   4  20       61.94       83.11     50.19 o 
   3   4  20     1222.17     1220.66     75.78 o 
   4   4  20      195.81      145.61     62.79 o 
   5   4  20     2475.84     2244.52     93.78 o 
   6   4  20      111.67      146.29     64.22 o 
   7   4  20       70.26       31.11     66.25 o 
   8   4  20       27.38      -13.22     68.76 o 
   9   4  20      266.10      184.85     85.25 o 
   1   5  20      802.58      810.35     67.75 o 
   2   5  20      636.46      770.60     78.53 o 
   3   5  20     1382.18     1374.71     90.12 o 
   4   5  20      739.24      754.38     80.85 o 
   5   5  20      165.60      207.32     76.63 o 
   6   5  20      210.79      151.32     84.56 o 
   7   5  20      161.46      269.84     88.39 o 
   8   5  20        2.28       -1.20    101.40 o 
   0   6  20       61.12      -56.72    118.48 o 
   1   6  20       58.75       19.29     91.07 o 
   2   6  20        4.81      -72.96     88.67 o 
   3   6  20      292.38      283.85     94.82 o 
   4   6  20      341.68      206.76     96.91 o 
   5   6  20        1.64       11.33     96.11 o 
   1   1  21     1092.30     1126.28     60.38 o 
   2   1  21     1426.97     1459.87     57.28 o 
   3   1  21     3078.89     3005.61     76.77 o 
   4   1  21      393.94      452.11     53.67 o 
   5   1  21       72.17       79.10     55.09 o 
   6   1  21     2240.24     2397.49    159.28 o 
   7   1  21      261.00      239.80     62.30 o 
   8   1  21       10.72        6.70     63.19 o 
   9   1  21      120.65      200.21     69.01 o 
  10   1  21       10.71       -0.11     81.64 o 
  11   1  21      329.58      365.88     90.82 o 
   0   2  21       64.42       -1.31     65.23 o 
   1   2  21     1348.97     1549.37     56.19 o 
   2   2  21        4.31      -31.65     52.16 o 
   3   2  21     4618.43     4526.95    105.22 o 
   4   2  21     1193.42     1151.76     79.66 o 
   5   2  21       75.83      107.03     55.52 o 
   6   2  21      244.54      239.26     58.33 o 
   7   2  21       83.01       24.34     62.42 o 
   8   2  21     1974.74     1914.72    107.81 o 
   9   2  21     1758.50     1832.38    133.55 o 
  10   2  21        7.61       61.15     89.10 o 
  11   2  21        8.79      -11.14    100.34 o 
   1   3  21      138.96      119.45     46.35 o 
   2   3  21      472.10      369.70     51.61 o 
   3   3  21      159.06      198.39     50.67 o 
   4   3  21      264.84      223.85     51.06 o 
   5   3  21     3822.97     4069.86    141.74 o 
   6   3  21       27.83      -56.68     56.68 o 
   7   3  21       24.10      -52.92     62.03 o 
   8   3  21      528.77      532.14     72.20 o 
   9   3  21     1007.63      955.10     93.78 o 
  10   3  21      522.99      505.08    107.60 o 
   0   4  21     1398.69     1407.09     89.95 o 
   1   4  21      150.47      174.60     52.73 o 
   2   4  21      302.18      250.01     51.92 o 
   3   4  21      185.47      148.70     63.01 o 
   4   4  21      225.62      201.64     68.33 o 
   5   4  21      109.79      116.02     70.15 o 
   6   4  21       13.68       -6.59     67.95 o 
   7   4  21      242.59      330.26     72.03 o 
   8   4  21       49.09      104.92     73.38 o 
   9   4  21      253.71      148.17     89.10 o 
   1   5  21      100.79      140.39     74.14 o 
   2   5  21      132.93      194.69     75.47 o 
   3   5  21      171.46      106.82     82.37 o 
   4   5  21       68.74      141.82     77.99 o 
   5   5  21        6.45      -81.33     81.33 o 
   6   5  21      115.08       98.27     85.52 o 
   7   5  21      455.04      529.51     95.84 o 
   0   6  21       26.19     -138.04    138.04 o 
   1   6  21       36.33      -48.61     92.75 o 
   2   6  21      858.25     1038.16    106.64 o 
   3   6  21      262.87      225.64     96.82 o 
   4   6  21       69.44       20.49     96.23 o 
   0   0  22     8584.12     8542.37    337.41 o 
   1   0  22     2508.56     2489.70    137.77 o 
   2   0  22      668.89      600.09     67.30 o 
   3   0  22       10.39       -8.18     61.55 o 
   4   0  22     8864.00     8499.67    217.14 o 
   5   0  22      862.09      980.15     78.95 o 
   6   0  22     1922.85     1966.75    103.48 o 
   7   0  22      427.92      424.06    108.34 o 
   8   0  22        1.83     -106.41    110.97 o 
   9   0  22      545.31      388.23    124.31 o 
  10   0  22     2374.45     2381.30    189.34 o 
  11   0  22      705.44      718.34    131.52 o 
   1   1  22       52.30       80.34     48.97 o 
   2   1  22       52.97       27.46     47.38 o 
   3   1  22        0.01       70.14     48.16 o 
   4   1  22      308.90      321.66     54.34 o 
   5   1  22     2222.20     2272.13     81.58 o 
   6   1  22     4649.91     4702.46    133.35 o 
   7   1  22     7798.06     7277.79    192.58 o 
   8   1  22     3308.27     3355.40    112.79 o 
   9   1  22      341.93      296.56     74.14 o 
  10   1  22       33.46       38.09     83.91 o 
  11   1  22      202.68      274.95     96.33 o 
   0   2  22     1077.02     1058.34     73.75 o 
   1   2  22      435.38      455.37     47.34 o 
   2   2  22      510.19      494.19     60.62 o 
   3   2  22       25.54       56.46     50.52 o 
   4   2  22      639.87      732.93     58.72 o 
   5   2  22      325.27      302.30     57.44 o 
   6   2  22      139.10      131.46     61.76 o 
   7   2  22       34.16       13.19     64.72 o 
   8   2  22      889.28      879.04     90.77 o 
   9   2  22      110.62       79.59     72.23 o 
  10   2  22       62.01      -59.06    100.61 o 
   1   3  22       53.74       12.47     42.55 o 
   2   3  22      313.80      280.81     54.36 o 
   3   3  22      843.42      929.99     62.80 o 
   4   3  22      194.36      247.33     55.60 o 
   5   3  22       76.94      118.01     56.55 o 
   6   3  22      492.60      412.94     66.72 o 
   7   3  22      377.90      248.48     66.38 o 
   8   3  22      411.97      245.75     78.16 o 
   9   3  22      328.68      269.15     88.25 o 
   0   4  22     1504.90     1390.58    104.69 o 
   1   4  22      138.97       47.28     50.41 o 
   2   4  22      315.18      217.30     64.43 o 
   3   4  22      278.31      289.65     70.07 o 
   4   4  22        1.97       -1.89     71.57 o 
   5   4  22      164.57       90.86     81.13 o 
   6   4  22        0.03      -10.64     69.14 o 
   7   4  22        0.04      117.04     73.27 o 
   8   4  22      243.61      210.56     77.19 o 
   1   5  22       65.96      -48.54     81.09 o 
   2   5  22       29.99      113.22     81.22 o 
   3   5  22       39.34      183.63     90.97 o 
   4   5  22      154.31       64.52     83.82 o 
   5   5  22       32.54      -78.95     78.95 o 
   6   5  22      141.99      132.43     96.29 o 
   0   6  22       23.85      123.69    195.73 o 
   1   6  22      174.11      -49.28    102.66 o 
   2   6  22        6.58      104.00     99.53 o 
   3   6  22       32.33        5.12     98.96 o 
   1   1  23       97.22       34.71     49.91 o 
   2   1  23      822.80      795.27     55.60 o 
   3   1  23     1541.54     1500.61     65.44 o 
   4   1  23      278.92      273.22     57.91 o 
   5   1  23     2036.54     1945.16     79.91 o 
   6   1  23      603.59      621.42     69.06 o 
   7   1  23      160.99      153.19     79.99 o 
   8   1  23      640.33      588.66     76.65 o 
   9   1  23        3.28      -71.21     73.06 o 
  10   1  23     1003.47     1074.50    112.62 o 
   0   2  23        0.05      -66.65     66.65 o 
   1   2  23      358.39      392.58     57.71 o 
   2   2  23     1022.15     1036.11     67.71 o 
   3   2  23     2451.41     2511.50    103.21 o 
   4   2  23      487.34      413.74     59.23 o 
   5   2  23      405.87      404.04     63.89 o 
   6   2  23     1605.16     1471.05     77.89 o 
   7   2  23       55.86      -68.11     68.11 o 
   8   2  23      673.30      709.10     82.43 o 
   9   2  23      196.69      208.04     78.49 o 
  10   2  23       11.66      -46.96    101.89 o 
   1   3  23       12.39      -44.10     45.48 o 
   2   3  23       91.86      109.14     54.73 o 
   3   3  23       28.94       53.05     55.21 o 
   4   3  23      233.80      125.07     60.81 o 
   5   3  23        8.51       -9.55     63.50 o 
   6   3  23       48.28       53.40     63.96 o 
   7   3  23      242.26      139.15     69.69 o 
   8   3  23      112.62      153.71     80.62 o 
   9   3  23       80.90       37.53     91.30 o 
   0   4  23      800.10      711.11    104.76 o 
   1   4  23     2021.92     1994.35     94.58 o 
   2   4  23      252.78      374.26     74.84 o 
   3   4  23       10.56      -44.39     71.09 o 
   4   4  23     1849.84     1794.13    100.44 o 
   5   4  23      231.57      163.42     74.64 o 
   6   4  23      541.32      435.45     81.04 o 
   7   4  23      172.81       42.92     77.71 o 
   8   4  23      142.71      104.12     90.06 o 
   1   5  23        3.74       10.66     83.10 o 
   2   5  23       25.03       74.81     85.10 o 
   3   5  23        5.65      -40.32     87.89 o 
   4   5  23        5.05       57.24     88.05 o 
   5   5  23      471.42      378.84     99.15 o 
   6   5  23      577.35      494.12    109.76 o 
   0   6  23       44.69      129.02    154.56 o 
   1   6  23      489.15      449.05    113.71 o 
   0   0  24     8922.24     8938.73    431.16 o 
   1   0  24       29.63       68.39     88.42 o 
   2   0  24     1127.67     1147.42     97.96 o 
   3   0  24     8249.63     8156.47    212.88 o 
   4   0  24    10390.66    10159.55    254.47 o 
   5   0  24      625.98      587.19     80.86 o 
   6   0  24      451.64      347.60    101.92 o 
   7   0  24      509.97      368.27    197.55 o 
   8   0  24      233.22      185.45    125.82 o 
   9   0  24      360.37      171.22    135.94 o 
  10   0  24      882.69      873.71    132.32 o 
   1   1  24        0.41      -54.74     54.74 o 
   2   1  24      240.70      318.41     54.10 o 
   3   1  24     1393.28     1507.76     77.41 o 
   4   1  24      631.68      677.84     65.53 o 
   5   1  24      353.43      351.12     63.95 o 
   6   1  24      665.66      623.20     77.79 o 
   7   1  24       22.60        5.55     80.31 o 
   8   1  24       21.74      -68.70     72.46 o 
   9   1  24      213.37      204.69     86.75 o 
  10   1  24       32.89      -58.30     94.86 o 
   0   2  24     2165.61     2346.85    121.63 o 
   1   2  24     1811.68     1919.21     78.31 o 
   2   2  24     3016.34     3168.36    100.60 o 
   3   2  24      133.67       99.58     59.09 o 
   4   2  24      863.79      948.87     92.16 o 
   5   2  24        4.82      -64.74     65.87 o 
   6   2  24     1475.01     1365.19     80.52 o 
   7   2  24      116.10       54.62     69.85 o 
   8   2  24      507.60      372.03     80.17 o 
   9   2  24       82.27       55.59     77.84 o 
   1   3  24       38.57        6.24     50.03 o 
   2   3  24      879.18      966.51     69.60 o 
   3   3  24      960.94      881.46     71.14 o 
   4   3  24      821.08     1030.49     78.21 o 
   5   3  24       13.82      -63.13     63.13 o 
   6   3  24      667.51      691.44     74.70 o 
   7   3  24       25.98      -75.33     75.33 o 
   8   3  24      318.59      218.06     87.44 o 
   0   4  24      365.85      226.74     81.90 o 
   1   4  24      311.40      166.92     70.90 o 
   2   4  24      216.08      157.06     75.41 o 
   3   4  24      418.14      278.13     84.30 o 
   4   4  24      360.57      292.21     85.55 o 
   5   4  24       20.87      -51.39     76.91 o 
   6   4  24       13.87       26.01     80.44 o 
   7   4  24       14.21      -61.73     77.88 o 
   1   5  24       10.90      124.43     87.12 o 
   2   5  24        2.60        7.54     87.26 o 
   3   5  24       82.51       57.06     89.67 o 
   4   5  24       22.70      -94.23     94.23 o 
   5   5  24     1033.94      823.00    108.45 o 
   1   1  25      506.35      584.73     64.26 o 
   2   1  25       25.58       10.25     56.85 o 
   3   1  25      221.93      218.42     58.39 o 
   4   1  25      448.41      460.00     74.90 o 
   5   1  25      573.78      462.84     76.20 o 
   6   1  25      386.40      432.53     79.14 o 
   7   1  25      551.09      682.47     89.63 o 
   8   1  25       90.33       70.07     78.40 o 
   9   1  25      407.14      640.38     99.10 o 
   0   2  25     6247.74     6182.32    207.67 o 
   1   2  25       33.93       12.22     58.96 o 
   2   2  25      911.72      980.82     73.20 o 
   3   2  25      583.62      733.43     69.83 o 
   4   2  25      826.94      796.37     92.22 o 
   5   2  25      359.97      314.59     72.76 o 
   6   2  25       49.94       89.91     73.11 o 
   7   2  25      435.42      398.15     76.84 o 
   8   2  25        3.45      -79.61     79.61 o 
   9   2  25      580.28      614.63     95.93 o 
   1   3  25      483.18      466.48     67.75 o 
   2   3  25        2.78       73.03     67.06 o 
   3   3  25      297.17      251.91     72.56 o 
   4   3  25       34.52      -40.17     66.37 o 
   5   3  25       78.31       87.39     70.58 o 
   6   3  25      258.59      171.60     76.96 o 
   7   3  25     1075.53     1055.42     88.49 o 
   8   3  25       58.97       57.20     86.08 o 
   0   4  25       73.88      -42.27    103.46 o 
   1   4  25      264.42      235.97     67.89 o 
   2   4  25      641.19      783.37     91.75 o 
   3   4  25      149.74      127.62     82.93 o 
   4   4  25       41.45      -64.64     86.73 o 
   5   4  25      196.88      143.02     84.09 o 
   6   4  25        6.78      -51.93     85.00 o 
   1   5  25        0.18      -60.14     93.87 o 
   2   5  25        1.05       36.71     91.35 o 
   3   5  25      237.17      253.66     97.00 o 
   4   5  25      645.53      762.15    107.85 o 
   0   0  26     4140.51     4179.35    377.93 o 
   1   0  26        2.94       -8.82     87.26 o 
   2   0  26     1826.39     1863.85    118.89 o 
   3   0  26     7586.91     7267.84    215.77 o 
   4   0  26      852.51      912.00    106.07 o 
   5   0  26      439.85      496.40    105.07 o 
   6   0  26       71.65      107.72    116.91 o 
   7   0  26      383.33      458.62    130.27 o 
   8   0  26       34.30       56.24    132.65 o 
   9   0  26      317.29      325.39    150.32 o 
   1   1  26       11.08        0.22     62.33 o 
   2   1  26      238.39      194.21     62.76 o 
   3   1  26        5.50       17.41     64.16 o 
   4   1  26      735.42      826.65     79.51 o 
   5   1  26       13.59       46.52     73.99 o 
   6   1  26        5.98      -78.26     78.26 o 
   7   1  26        1.04       54.26     88.74 o 
   8   1  26       19.14      -64.31     89.49 o 
   9   1  26      611.89      547.61     99.57 o 
   0   2  26      114.40      272.34     84.08 o 
   1   2  26     3224.73     3244.33    108.18 o 
   2   2  26      538.85      453.08     73.57 o 
   3   2  26       75.07      196.77     75.40 o 
   4   2  26      254.28      149.33     75.58 o 
   5   2  26       23.66      -30.11     70.81 o 
   6   2  26      154.01       19.38     81.50 o 
   7   2  26      423.04      449.92     79.45 o 
   8   2  26       68.06       63.92     82.61 o 
   1   3  26      269.46      231.68     70.45 o 
   2   3  26      306.65      289.29     69.99 o 
   3   3  26       13.24      -46.36     70.24 o 
   4   3  26      287.46      376.31     73.04 o 
   5   3  26        0.17       15.93     68.01 o 
   6   3  26       97.25       41.44     75.00 o 
   7   3  26      814.07      777.05     89.20 o 
   0   4  26      715.43      589.28    116.16 o 
   1   4  26     1293.10     1362.69    102.80 o 
   2   4  26      328.97      276.43     82.72 o 
   3   4  26      151.17       59.61     86.18 o 
   4   4  26        4.49       -1.76     90.84 o 
   5   4  26      268.63      201.82     92.23 o 
   6   4  26      194.56      147.67     90.08 o 
   1   5  26      176.50      245.15    100.82 o 
   2   5  26        0.34       29.97    104.84 o 
   1   1  27      808.73      924.76     75.43 o 
   2   1  27      125.95      236.83     74.11 o 
   3   1  27      837.54      862.94     76.42 o 
   4   1  27       35.24      -59.73     72.49 o 
   5   1  27      524.28      608.94     85.04 o 
   6   1  27      560.87      601.86     87.72 o 
   7   1  27      330.50      247.71     95.88 o 
   8   1  27        0.86      -81.45     90.09 o 
   0   2  27     8778.40     8325.91    307.44 o 
   1   2  27       99.64       -4.70     70.71 o 
   2   2  27      404.06      439.12     83.32 o 
   3   2  27        7.88      -76.13     76.13 o 
   4   2  27      156.57      165.31     75.00 o 
   5   2  27      106.28       37.02     78.27 o 
   6   2  27       13.80      -27.31     82.29 o 
   7   2  27      125.74      158.93     79.31 o 
   8   2  27       95.65        3.37     91.28 o 
   1   3  27      221.95      180.27     71.46 o 
   2   3  27      962.61      987.75     82.55 o 
   3   3  27      318.53      429.87     77.60 o 
   4   3  27      202.42      179.10     74.47 o 
   5   3  27      241.54      230.76     77.54 o 
   6   3  27       47.09      141.57     80.61 o 
   0   4  27     2041.87     2094.12    183.62 o 
   1   4  27       10.29       14.24     87.00 o 
   2   4  27     1180.91     1118.28    103.99 o 
   3   4  27      136.14      133.55     86.21 o 
   4   4  27      224.19      233.08     98.05 o 
   5   4  27        0.07      -85.79     85.79 o 
   0   0  28      656.99      995.33    439.00 o 
   1   0  28     1150.87     1330.48    136.85 o 
   2   0  28     1695.12     1450.18    117.79 o 
   3   0  28      694.18      654.56    113.83 o 
   4   0  28     1671.01     1920.91    155.81 o 
   5   0  28       45.47       23.11    109.43 o 
   6   0  28       36.18       70.45    150.63 o 
   7   0  28        1.99       38.22    129.36 o 
   8   0  28      108.04      165.10    145.84 o 
   1   1  28      483.85      616.20     78.16 o 
   2   1  28      544.89      484.10     79.18 o 
   3   1  28      285.60      312.88     74.24 o 
   4   1  28      626.52      648.32     86.57 o 
   5   1  28      477.02      324.63     85.61 o 
   6   1  28      178.80      295.40     87.84 o 
   7   1  28       40.40      -32.19     94.78 o 
   0   2  28      101.50      298.20     96.00 o 
   1   2  28      102.27      139.53     74.28 o 
   2   2  28      708.56      955.00     91.33 o 
   3   2  28       11.83      -40.00     82.66 o 
   4   2  28     1060.64     1043.87     87.34 o 
   5   2  28        5.29      -79.45     79.45 o 
   6   2  28      343.86      463.62     87.15 o 
   7   2  28       89.91       15.50     81.51 o 
   1   3  28      765.68      636.20     86.61 o 
   2   3  28      707.46      517.72     82.74 o 
   3   3  28       19.74      153.80     78.82 o 
   4   3  28      486.96      486.04     85.23 o 
   5   3  28      163.38      128.59     84.09 o 
   6   3  28      814.77      739.05     89.20 o 
   0   4  28      110.87       83.11    177.79 o 
   1   4  28      194.98      225.76    106.16 o 
   2   4  28       85.68       51.69    101.57 o 
   3   4  28        8.19      -54.05     98.39 o 
   1   1  29        8.09      -22.23     75.24 o 
   2   1  29      332.04      257.89     80.97 o 
   3   1  29       58.88       26.56     74.48 o 
   4   1  29      139.21      140.28     84.60 o 
   5   1  29       72.24       39.48     86.18 o 
   6   1  29       21.16        5.23     89.03 o 
   7   1  29        7.58      -10.36     98.85 o 
   0   2  29        1.03       87.67    122.02 o 
   1   2  29     1475.08     1568.72     96.22 o 
   2   2  29      137.62      135.62     86.24 o 
   3   2  29       50.63      212.87     86.38 o 
   4   2  29     1047.26     1009.97     90.07 o 
   5   2  29       68.54       48.04     85.58 o 
   6   2  29      236.08      189.21     89.06 o 
   1   3  29        9.84      -85.57     85.57 o 
   2   3  29      243.53      122.29     86.32 o 
   3   3  29      452.46      517.36     86.70 o 
   4   3  29      309.40      285.06     85.18 o 
   0   4  29      141.31      161.14    135.80 o 
   1   4  29       30.61      -76.53    101.67 o 
   0   0  30       83.16     -176.24    176.24 o 
   1   0  30      340.51      593.69    138.87 o 
   2   0  30      331.30      495.10    111.24 o 
   3   0  30       13.72      -54.66    111.05 o 
   4   0  30     1324.55     1387.04    148.36 o 
   5   0  30      112.85      177.33    121.09 o 
   6   0  30      546.07      534.30    154.30 o 
   1   1  30       37.83      135.55     80.82 o 
   2   1  30        0.22       88.35     81.78 o 
   3   1  30      623.81      566.45     85.16 o 
   4   1  30       48.45       54.70     87.97 o 
   5   1  30       77.97        0.06     89.84 o 
   6   1  30      228.98      162.21     98.70 o 
   0   2  30      415.00      443.30    135.80 o 
   1   2  30       97.30      117.95     94.03 o 
   2   2  30      320.47      248.40     92.59 o 
   3   2  30      493.01      504.44     96.34 o 
   4   2  30      412.84      453.73     93.54 o 
   5   2  30       40.94      -58.13     86.15 o 
   1   3  30       70.82      264.32     94.72 o 
   2   3  30       56.41      -56.77     92.23 o 
   3   3  30      554.56      584.56    103.83 o 
   1   1  31     2857.63     2558.76    124.90 o 
   2   1  31      298.01      361.71     91.01 o 
   3   1  31       57.37       41.53     89.17 o 
   4   1  31      375.09      653.78     97.29 o 
   5   1  31       51.29       57.05     93.62 o 
   0   2  31      389.99      298.50    144.17 o 
   1   2  31        0.52      -28.33     93.75 o 
   2   2  31        0.38      -45.01    104.97 o 
   3   2  31       23.94      -39.97     97.92 o 
   0   0  32        2.43     -171.25    196.90 o 
   1   0  32     1249.82     1342.27    219.90 o 
   2   0  32        4.99       -1.01    139.03 o 
   3   0  32      174.46      -49.19    122.41 o 
   1   1  32        3.34      -30.92     97.03 o 
   2   1  32      700.51      711.62     98.69 o 
   3   1  32      580.58      653.14    100.35 o 
   0   2  32       19.07      125.88    144.03 o 
   1   2  32       83.17      -19.13    102.83 o 
                                              


data_250K

_shelx_title ' ab1007_250K in Pbca' 
_shelx_refln_list_code          4 
_shelx_F_calc_maximum      368.39 
_exptl_crystal_F_000      1680.00 
_reflns_d_resolution_high  0.8399 
 
loop_ 
 _symmetry_equiv_pos_as_xyz 
 'x, y, z' 
 '-x+1/2, -y, z+1/2' 
 '-x, y+1/2, -z+1/2' 
 'x+1/2, -y+1/2, -z' 
 '-x, -y, -z' 
 'x-1/2, y, -z-1/2' 
 'x, -y-1/2, z-1/2' 
 '-x-1/2, y-1/2, z' 
 
_cell_length_a    14.4059 
_cell_length_b     7.9797 
_cell_length_c    31.4670 
_cell_angle_alpha  90.000 
_cell_angle_beta   90.000 
_cell_angle_gamma  90.000 
 
_shelx_F_squared_multiplier     1.000 
 
loop_ 
 _refln_index_h 
 _refln_index_k 
 _refln_index_l 
 _refln_F_squared_calc 
 _refln_F_squared_meas 
 _refln_F_squared_sigma 
 _refln_observed_status 
   4   0   0     5570.61     5561.77    110.10 o 
   6   0   0       14.94       31.35     33.73 o 
   8   0   0     3523.62     3449.63     99.48 o 
  10   0   0     1862.18     1959.69    124.17 o 
  12   0   0      762.51      652.50     98.29 o 
  14   0   0    14838.76    14704.09    500.66 o 
  16   0   0        1.54       61.51    184.45 o 
   2   1   0      628.98      791.68     29.34 o 
   4   1   0     3127.53     3220.41     58.27 o 
   6   1   0    10297.59    10324.63    133.70 o 
   8   1   0     2699.26     2449.57     69.90 o 
  10   1   0     1248.82     1188.81     95.64 o 
  12   1   0     1395.93     1180.70     81.20 o 
  14   1   0       37.17       51.24     59.44 o 
  16   1   0      679.72      691.01    112.64 o 
   2   2   0   135712.11   132117.17   1395.23 o 
   4   2   0      313.43      324.01     23.68 o 
   6   2   0      680.84      735.19     32.59 o 
   8   2   0     1806.73     1734.74     65.67 o 
  10   2   0      254.69      226.86     43.79 o 
  12   2   0     3138.22     2977.93    112.86 o 
  14   2   0       11.78      106.90     57.48 o 
  16   2   0     1068.89     1162.03    174.32 o 
   2   3   0     1648.12     1666.88     34.12 o 
   4   3   0     1013.81     1138.40     31.48 o 
   6   3   0     2756.32     2695.19     77.77 o 
   8   3   0      454.50      397.69     38.54 o 
  10   3   0        2.78      -36.46     36.46 o 
  12   3   0      455.97      555.75     64.43 o 
  14   3   0       61.85       20.57     88.72 o 
  16   3   0     1421.88     1441.93    158.61 o 
   2   4   0     4729.00     4882.48     87.11 o 
   4   4   0     5577.88     5642.18     80.27 o 
   6   4   0     3976.96     4102.51     80.10 o 
   8   4   0     1662.69     1712.78     65.17 o 
  10   4   0      192.54      158.48     42.05 o 
  12   4   0      632.36      670.58    101.60 o 
  14   4   0      429.11      317.11    102.72 o 
   2   5   0      933.42     1004.22     56.76 o 
   4   5   0      615.47      630.33     30.40 o 
   6   5   0       15.43        8.95     22.16 o 
   8   5   0      422.24      467.94     49.81 o 
  10   5   0      364.27      330.30     78.20 o 
  12   5   0      439.83      650.13    103.08 o 
  14   5   0     1251.67     1141.51    135.43 o 
   2   6   0      690.40      633.49    157.43 o 
   4   6   0      309.88      380.75     35.49 o 
   6   6   0      428.52      337.82     44.45 o 
   8   6   0       12.17      -56.16     56.16 o 
  10   6   0      143.72      180.89     75.41 o 
  12   6   0     1090.85     1068.28    187.83 o 
   2   7   0      230.00      264.43     40.10 o 
   4   7   0       43.80      -13.36     25.54 o 
   6   7   0       21.89       67.20     68.92 o 
   8   7   0      705.28      607.47    110.13 o 
  10   7   0      132.78      233.69     86.70 o 
   4   8   0      338.09      289.18     79.73 o 
   6   8   0      117.01      182.60     46.39 o 
   8   8   0       81.60      -37.51     70.01 o 
   4   9   0        0.80      -18.92     70.27 o 
   2   1   1    12545.90    12537.24    114.29 o 
   3   1   1     4117.37     3997.01     43.40 o 
   4   1   1      583.11      594.31     18.31 o 
   5   1   1      252.01      231.02     17.07 o 
   6   1   1     1109.36     1043.27     26.36 o 
   7   1   1     7802.42     7413.50     76.00 o 
   8   1   1     1110.11     1043.63     49.30 o 
   9   1   1     2705.60     2793.90     60.67 o 
  10   1   1     1170.93     1159.40     45.20 o 
  11   1   1      186.41      236.82     36.52 o 
  12   1   1      451.32      441.72     44.15 o 
  13   1   1      411.88      466.46     47.24 o 
  14   1   1      284.11      290.31     46.35 o 
  15   1   1       14.43       67.46     44.41 o 
  16   1   1       25.82       26.17     56.52 o 
  17   1   1       85.05       -4.02     64.07 o 
   1   2   1    22706.64    23373.07    211.90 o 
   2   2   1    46507.67    46849.48    341.17 o 
   3   2   1    53490.15    53080.18    428.25 o 
   4   2   1     5161.63     4976.33     77.78 o 
   5   2   1      890.37      841.85     27.96 o 
   6   2   1        7.70      -14.38     14.97 o 
   7   2   1     2050.51     2104.72     43.72 o 
   8   2   1      280.03      304.30     24.90 o 
   9   2   1        3.87       22.26     23.33 o 
  10   2   1      134.06      129.98     27.57 o 
  11   2   1     4026.51     4076.82     79.58 o 
  12   2   1     2438.36     2415.24     74.83 o 
  13   2   1     3506.55     3320.99     89.07 o 
  14   2   1        6.40        9.96     40.18 o 
  15   2   1      130.70      164.23     55.14 o 
  16   2   1      280.17      373.55     83.89 o 
   1   3   1     1355.23     1228.42     25.71 o 
   2   3   1      550.00      517.38     13.96 o 
   3   3   1     4342.66     4267.17     39.85 o 
   4   3   1     1592.91     1536.24     26.12 o 
   5   3   1        1.19       -9.82     12.10 o 
   6   3   1       38.32       37.25     16.87 o 
   7   3   1      153.95      141.69     25.01 o 
   8   3   1     1065.90     1052.07     35.02 o 
   9   3   1      237.93      202.44     27.16 o 
  10   3   1       35.01       -0.77     26.38 o 
  11   3   1       15.51       -7.54     32.12 o 
  12   3   1     1252.86     1304.42     58.16 o 
  13   3   1        2.67       12.61     45.42 o 
  14   3   1       74.53      107.76     64.55 o 
  15   3   1        1.22        2.38     68.16 o 
  16   3   1       73.68       60.82     75.88 o 
   1   4   1     9174.59     8985.89    143.57 o 
   2   4   1     2953.66     2874.88     42.19 o 
   3   4   1        0.01       -5.34     11.37 o 
   4   4   1     2483.39     2572.60     34.50 o 
   5   4   1       13.89        7.29     15.03 o 
   6   4   1      585.96      555.20     24.50 o 
   7   4   1      745.98      726.87     33.30 o 
   8   4   1      817.43      840.54     32.80 o 
   9   4   1     1481.05     1515.08     48.93 o 
  10   4   1      425.54      276.76     56.40 o 
  11   4   1      229.80      252.46     57.11 o 
  12   4   1      250.42      184.22     79.38 o 
  13   4   1     1608.10     1619.77     99.39 o 
  14   4   1      348.90      415.66     75.61 o 
  15   4   1        5.67      -12.70     67.83 o 
   1   5   1     1382.84     1377.84     38.43 o 
   2   5   1     5245.40     5149.26     76.61 o 
   3   5   1        8.44        2.00     16.99 o 
   4   5   1      883.60      905.44     25.24 o 
   5   5   1      706.00      675.54     27.06 o 
   6   5   1     1190.14     1149.97     29.01 o 
   7   5   1     1746.46     1825.11     39.41 o 
   8   5   1     1714.42     1729.42     41.29 o 
   9   5   1        1.21      -43.31     43.31 o 
  10   5   1     1214.73     1220.57     76.50 o 
  11   5   1        9.25       20.60     51.72 o 
  12   5   1      146.54       99.93     60.62 o 
  13   5   1      346.46      341.66     71.06 o 
  14   5   1       28.85       89.17     68.83 o 
   2   6   1      326.90      313.27     29.06 o 
   3   6   1       12.04       17.68     15.85 o 
   4   6   1      597.31      601.23     27.77 o 
   5   6   1     1840.77     1886.68     48.40 o 
   6   6   1      354.17      397.12     32.11 o 
   7   6   1       77.52       41.75     40.58 o 
   8   6   1      569.18      568.63     56.29 o 
   9   6   1       97.57      100.40     49.78 o 
  10   6   1     1442.52     1510.14     85.29 o 
  11   6   1      126.93      158.41     58.68 o 
  12   6   1       14.62       87.66     72.17 o 
  13   6   1      157.54      235.54     71.59 o 
   2   7   1      275.40      197.36     38.42 o 
   3   7   1       18.90      -12.68     29.72 o 
   4   7   1      194.56      172.27     23.10 o 
   5   7   1      456.61      528.04     40.33 o 
   6   7   1      487.24      481.07     47.25 o 
   7   7   1        9.95      -40.81     40.81 o 
   8   7   1      547.67      546.25     90.40 o 
   9   7   1      104.31      107.92     51.51 o 
  10   7   1      841.20      737.42     72.72 o 
  11   7   1      260.11      397.80     71.78 o 
   3   8   1      837.76      671.98     63.51 o 
   4   8   1      398.57      440.10     72.30 o 
   5   8   1       21.69       -1.65     32.31 o 
   6   8   1      235.46      320.70     45.06 o 
   7   8   1       47.63       11.48     45.20 o 
   8   8   1       12.97       28.49     43.31 o 
   9   8   1       11.97      -40.00     60.85 o 
   4   9   1       12.95       33.68     49.20 o 
   5   9   1       74.41      106.75     58.29 o 
   3   0   2     4953.55     4905.84     66.27 o 
   4   0   2     1351.55     1150.13     33.07 o 
   5   0   2     2510.45     2512.29     52.29 o 
   6   0   2     6214.66     6117.79     90.82 o 
   7   0   2      182.80      120.24     26.97 o 
   8   0   2     2939.29     2893.40     66.20 o 
   9   0   2     3962.36     4001.25    153.70 o 
  10   0   2     2058.43     1908.52     83.42 o 
  11   0   2     8856.09     8688.13    191.20 o 
  12   0   2      133.09      220.96     56.04 o 
  13   0   2     1284.22     1340.61     91.45 o 
  14   0   2      238.47      273.94     66.63 o 
  15   0   2     2768.99     2930.33    149.99 o 
  16   0   2     1113.47     1205.93    102.44 o 
  17   0   2      342.73      344.47     88.65 o 
   2   1   2      765.14      714.26     16.07 o 
   3   1   2    39050.68    38872.42    305.92 o 
   4   1   2      110.81      127.38     14.51 o 
   5   1   2     9708.67     9680.98     87.51 o 
   6   1   2     3639.40     3602.35     46.59 o 
   7   1   2     2404.95     2565.68     41.90 o 
   8   1   2       75.05       98.60     22.16 o 
   9   1   2     3644.98     3707.51     68.25 o 
  10   1   2        8.64      -27.58     27.58 o 
  11   1   2     2350.14     2306.52     69.71 o 
  12   1   2     6213.67     6291.98    116.11 o 
  13   1   2      594.44      624.48     49.59 o 
  14   1   2      114.03      126.12     43.17 o 
  15   1   2      602.38      544.91     56.13 o 
  16   1   2      142.78      194.60     60.83 o 
  17   1   2      541.92      633.52     79.20 o 
   0   2   2    27047.79    26419.54    395.59 o 
   1   2   2     8368.32     8388.40     73.18 o 
   2   2   2       47.86       20.51      9.56 o 
   3   2   2     4571.50     4506.65     47.11 o 
   4   2   2    16707.76    16342.01    141.92 o 
   5   2   2     1519.89     1666.09     35.73 o 
   6   2   2      148.22      178.40     19.30 o 
   7   2   2     3242.38     3345.44     54.27 o 
   8   2   2      245.84      277.08     25.00 o 
   9   2   2     1634.99     1672.22     44.98 o 
  10   2   2      814.11      801.91     46.14 o 
  11   2   2      338.52      448.85     38.13 o 
  12   2   2        0.77      -28.48     34.51 o 
  13   2   2     1128.48     1201.71     59.97 o 
  14   2   2        0.04       -1.88     43.85 o 
  15   2   2     1208.10     1269.75     81.16 o 
  16   2   2       36.49       64.20     76.36 o 
   1   3   2     1210.66     1204.75     23.57 o 
   2   3   2     3243.14     3232.84     36.85 o 
   3   3   2     1835.98     1675.79     23.87 o 
   4   3   2     6898.77     6982.92     62.06 o 
   5   3   2      607.52      706.10     24.87 o 
   6   3   2     1558.13     1477.91     48.47 o 
   7   3   2     3727.41     3658.58     63.36 o 
   8   3   2      330.17      343.86     25.64 o 
   9   3   2      146.88       60.90     24.99 o 
  10   3   2     9347.63     9059.59    113.00 o 
  11   3   2      508.13      549.90     42.15 o 
  12   3   2       43.56      -22.41     34.31 o 
  13   3   2       22.96       54.52     46.36 o 
  14   3   2       53.13      -29.03     82.70 o 
  15   3   2       84.28      -48.31     66.30 o 
  16   3   2      101.18       95.13     75.24 o 
   0   4   2     4121.34     4070.23     98.89 o 
   1   4   2     3203.43     3338.11     51.13 o 
   2   4   2     4663.12     4526.63     59.36 o 
   3   4   2     1156.24     1086.09     22.44 o 
   4   4   2     2671.25     2616.40     33.36 o 
   5   4   2     4710.51     4685.51     55.70 o 
   6   4   2       37.12       52.37     17.38 o 
   7   4   2      331.65      294.81     26.07 o 
   8   4   2       29.13       21.03     21.46 o 
   9   4   2       13.55       23.36     20.12 o 
  10   4   2     1225.32     1141.54     59.25 o 
  11   4   2      409.54      383.34     60.60 o 
  12   4   2      698.49      556.11     69.38 o 
  13   4   2       55.92       44.50     62.60 o 
  14   4   2        9.90       -0.17     65.00 o 
  15   4   2       51.92       50.64    104.35 o 
   1   5   2     1752.18     1707.88     43.82 o 
   2   5   2      752.38      769.58     24.16 o 
   3   5   2      834.77      803.43     26.17 o 
   4   5   2      142.12      136.03     16.65 o 
   5   5   2     2248.82     2141.75     43.17 o 
   6   5   2       43.35       39.78     17.68 o 
   7   5   2     1003.59     1089.94     38.50 o 
   8   5   2      847.08      884.93     39.71 o 
   9   5   2      264.23      207.31     50.12 o 
  10   5   2       83.68       76.29     58.12 o 
  11   5   2      269.43      235.65     58.65 o 
  12   5   2      173.92      196.94     61.45 o 
  13   5   2      485.10      471.82     74.97 o 
  14   5   2        3.66      -61.78     61.78 o 
   1   6   2      569.52      629.67     41.56 o 
   2   6   2        0.76      -16.98     19.89 o 
   3   6   2        0.02        4.27     17.57 o 
   4   6   2       80.70       47.14     20.15 o 
   5   6   2      281.37      236.35     27.85 o 
   6   6   2      621.15      588.69     35.09 o 
   7   6   2      158.83       68.08     41.57 o 
   8   6   2        6.08      -42.66     42.66 o 
   9   6   2      267.91      246.25     53.52 o 
  10   6   2        0.46       75.81     50.80 o 
  11   6   2        0.12      -30.41     51.06 o 
  12   6   2      128.44      177.84     63.97 o 
  13   6   2      190.26      198.27     69.71 o 
   2   7   2      252.71      187.12     27.61 o 
   3   7   2      863.37      893.37     38.10 o 
   4   7   2     1103.22     1113.43     34.31 o 
   5   7   2      560.01      671.70     43.83 o 
   6   7   2       22.00      -26.52     32.78 o 
   7   7   2      231.13      191.88     46.36 o 
   8   7   2      544.04      536.98     67.44 o 
   9   7   2       67.87       58.66     52.05 o 
  10   7   2      112.17       64.09     57.62 o 
  11   7   2      343.70      429.98     83.99 o 
   3   8   2      314.64      404.79     51.06 o 
   4   8   2      162.85      181.26     61.48 o 
   5   8   2        0.67       -7.44     33.14 o 
   6   8   2        3.49      -37.06     37.06 o 
   7   8   2      121.56       85.16     45.11 o 
   8   8   2       37.73       86.69     44.65 o 
   9   8   2       13.06      -12.40     46.38 o 
   4   9   2       53.73        3.90     50.16 o 
   5   9   2       20.64       85.15     59.22 o 
   2   1   3     7483.97     7510.04     70.08 o 
   3   1   3    52563.55    52043.09    393.88 o 
   4   1   3     1198.69     1203.80     23.75 o 
   5   1   3     6083.84     5846.24     59.82 o 
   6   1   3     2377.40     2468.18     39.05 o 
   7   1   3      139.16      123.00     19.07 o 
   8   1   3     2424.40     2477.12     50.01 o 
   9   1   3      296.22      356.15     28.69 o 
  10   1   3      487.66      527.92     38.02 o 
  11   1   3     2338.55     2391.16     70.28 o 
  12   1   3      292.53      279.44     41.34 o 
  13   1   3      769.42      788.75     53.34 o 
  14   1   3      193.98      185.38     44.50 o 
  15   1   3       82.49      131.97     47.14 o 
  16   1   3      322.26      237.08     65.41 o 
  17   1   3      261.79       56.99    114.65 o 
   0   2   3   103614.45   100344.37   1221.30 o 
   1   2   3      399.96      413.10     12.86 o 
   2   2   3      698.14      714.89     14.87 o 
   3   2   3    16397.70    16178.91    138.16 o 
   4   2   3      591.44      617.27     19.93 o 
   5   2   3     1891.19     1872.39     38.44 o 
   6   2   3     1089.93     1112.63     34.32 o 
   7   2   3       30.29       16.49     19.71 o 
   8   2   3      760.57      798.61     32.08 o 
   9   2   3      576.89      628.75     32.29 o 
  10   2   3      442.32      519.58     34.87 o 
  11   2   3       52.23       64.30     31.57 o 
  12   2   3      569.95      582.87     46.22 o 
  13   2   3      608.41      645.83     68.62 o 
  14   2   3     1093.12     1172.63     95.03 o 
  15   2   3       10.07       75.62     53.69 o 
  16   2   3       95.45      156.70     79.04 o 
   1   3   3      793.11      792.81     20.59 o 
   2   3   3      492.95      531.99     13.49 o 
   3   3   3     1775.36     1542.08     23.65 o 
   4   3   3       28.98       43.40     13.50 o 
   5   3   3     6549.52     6146.04     77.98 o 
   6   3   3     8156.00     7716.55     96.43 o 
   7   3   3      650.62      565.51     28.00 o 
   8   3   3     1382.94     1446.06     39.70 o 
   9   3   3     2995.13     2993.37     58.28 o 
  10   3   3      288.30      226.96     30.53 o 
  11   3   3      452.91      547.24     42.46 o 
  12   3   3      415.08      456.02     43.94 o 
  13   3   3        6.94      -27.80     45.53 o 
  14   3   3      114.17      157.34     67.03 o 
  15   3   3       14.64      -17.85     66.80 o 
  16   3   3       31.18      -72.41     72.41 o 
   0   4   3     3566.29     3555.44     74.26 o 
   1   4   3     1051.89     1064.79     27.23 o 
   2   4   3    12113.06    12160.85    138.63 o 
   3   4   3     8112.90     7917.55     78.89 o 
   4   4   3        0.63       -9.16     11.64 o 
   5   4   3       95.22       60.65     16.57 o 
   6   4   3       86.37      103.02     18.06 o 
   7   4   3        3.12       -2.13     14.43 o 
   8   4   3       15.50        2.71     21.51 o 
   9   4   3      578.04      606.93     32.89 o 
  10   4   3       13.12      -26.24     26.24 o 
  11   4   3      523.32      486.60     62.69 o 
  12   4   3     1195.03     1241.96     86.22 o 
  13   4   3      378.59      270.60     76.85 o 
  14   4   3      346.59      248.36     72.19 o 
  15   4   3      405.72      471.02     83.80 o 
   1   5   3      224.06      255.80     18.17 o 
   2   5   3        1.04        8.43     14.42 o 
   3   5   3     1346.45     1385.74     32.51 o 
   4   5   3      363.13      414.71     19.35 o 
   5   5   3      165.54      216.97     21.86 o 
   6   5   3      894.39      863.13     27.52 o 
   7   5   3     2168.67     2197.11     44.93 o 
   8   5   3       68.10       66.31     30.12 o 
   9   5   3      697.25      616.11     60.35 o 
  10   5   3        5.20      -24.07     47.45 o 
  11   5   3       98.45      132.91     54.01 o 
  12   5   3        1.67      -53.14     53.14 o 
  13   5   3       42.62        1.20     63.88 o 
  14   5   3        0.34      -14.48     67.01 o 
   0   6   3      186.57      212.16     43.24 o 
   1   6   3      845.25      878.09     72.30 o 
   2   6   3     1486.73     1486.87     38.64 o 
   3   6   3      329.51      287.56     21.26 o 
   4   6   3      897.37      981.99     37.05 o 
   5   6   3      459.06      344.72     27.62 o 
   6   6   3      291.43      267.14     32.20 o 
   7   6   3       87.82      106.19     42.53 o 
   8   6   3      355.35      326.75     75.17 o 
   9   6   3       48.90       -5.80     47.22 o 
  10   6   3       23.34        5.18     50.48 o 
  11   6   3      582.35      556.72     69.04 o 
  12   6   3        1.85      -31.61     59.59 o 
  13   6   3      188.14      224.77     70.07 o 
   1   7   3        3.82      -27.03     30.58 o 
   2   7   3      115.33       92.88     29.54 o 
   3   7   3      225.54      308.57     26.89 o 
   4   7   3      486.30      509.67     31.30 o 
   5   7   3      479.64      557.01     55.70 o 
   6   7   3       37.26       62.26     34.94 o 
   7   7   3      145.78      155.31     40.65 o 
   8   7   3        1.93      -45.59     45.59 o 
   9   7   3       59.88       92.86     53.82 o 
  10   7   3      197.69      164.66     58.14 o 
  11   7   3       76.71      253.54     65.63 o 
   2   8   3      141.81      101.35     56.76 o 
   3   8   3        9.99      -37.15     43.41 o 
   4   8   3       55.26       65.04     37.31 o 
   5   8   3        0.18        6.15     33.80 o 
   6   8   3      105.72      134.91     40.74 o 
   7   8   3       37.01       34.11     44.54 o 
   8   8   3        0.03      -47.26     47.26 o 
   9   8   3      125.28      180.24     50.17 o 
   3   9   3      124.96      183.78     67.57 o 
   4   9   3       15.04       14.03     49.99 o 
   5   9   3      670.56      722.66    145.94 o 
   2   0   4     6988.93     6733.97     77.82 o 
   3   0   4    22454.37    22375.59    248.31 o 
   4   0   4    53879.66    52893.25    570.62 o 
   5   0   4     7430.59     7372.25    101.15 o 
   6   0   4     8093.29     8594.43    116.96 o 
   7   0   4      399.12      297.44     29.23 o 
   8   0   4      792.14      879.25     55.09 o 
   9   0   4      140.04      107.00     41.56 o 
  10   0   4      240.44      192.09     46.90 o 
  11   0   4      579.79      530.12     60.61 o 
  12   0   4     2195.37     2248.02    103.56 o 
  13   0   4      694.21      695.97    120.73 o 
  14   0   4     2117.14     2316.61    116.43 o 
  15   0   4      118.62      235.06     71.43 o 
  16   0   4       56.42      -42.29     69.66 o 
  17   0   4     1432.51     1645.76    143.13 o 
   1   1   4       55.78       16.47      8.25 o 
   2   1   4      135.66       89.27      9.60 o 
   3   1   4    19655.51    19586.80    150.45 o 
   4   1   4    15786.51    15727.50    129.34 o 
   5   1   4      386.92      355.26     18.68 o 
   6   1   4      679.90      735.85     23.85 o 
   7   1   4      681.81      680.32     26.60 o 
   8   1   4      129.34       97.07     22.73 o 
   9   1   4      640.48      586.87     35.31 o 
  10   1   4     4960.54     4926.85    105.98 o 
  11   1   4        4.55      -24.62     32.55 o 
  12   1   4     1116.58     1125.64     61.67 o 
  13   1   4      544.68      386.65     45.84 o 
  14   1   4       11.13      -28.00     40.20 o 
  15   1   4        0.74       69.82     46.38 o 
  16   1   4       13.42       44.11     59.48 o 
   0   2   4     2445.04     2668.41     37.47 o 
   1   2   4    20984.55    21048.84    161.22 o 
   2   2   4    13719.33    13509.61    104.62 o 
   3   2   4      402.64      394.88     17.10 o 
   4   2   4     1553.82     1492.86     28.28 o 
   5   2   4      360.00      391.41     18.42 o 
   6   2   4      280.85      279.75     21.82 o 
   7   2   4       59.30       69.31     20.61 o 
   8   2   4      508.58      597.64     29.93 o 
   9   2   4      449.77      543.92     31.30 o 
  10   2   4      304.70      302.20     33.39 o 
  11   2   4       55.24       43.61     31.01 o 
  12   2   4     1080.10     1080.79     55.55 o 
  13   2   4      340.62      383.80     46.22 o 
  14   2   4        5.99       15.62     44.29 o 
  15   2   4      854.41      964.60     73.93 o 
  16   2   4        0.11      -17.98     70.59 o 
   1   3   4     6315.69     6142.92     62.67 o 
   2   3   4     2693.64     2752.15     30.49 o 
   3   3   4      974.74     1014.92     19.52 o 
   4   3   4     5207.65     5441.13     55.54 o 
   5   3   4    14727.50    15279.30    162.63 o 
   6   3   4     8552.93     8621.80    100.42 o 
   7   3   4     1370.74     1348.41     38.27 o 
   8   3   4     3341.45     3485.45     59.29 o 
   9   3   4     2056.36     1946.15     48.76 o 
  10   3   4     1672.76     1693.66     49.35 o 
  11   3   4      567.25      548.70     42.68 o 
  12   3   4      248.72      263.95     40.40 o 
  13   3   4        9.31      -22.15     52.78 o 
  14   3   4       14.42      -36.70     61.80 o 
  15   3   4       70.59       40.48     69.00 o 
  16   3   4      123.28       41.50     75.77 o 
   0   4   4     2060.73     1955.82     45.61 o 
   1   4   4    12611.07    12965.05    145.15 o 
   2   4   4      362.82      471.18     18.18 o 
   3   4   4      306.00      334.48     18.35 o 
   4   4   4        6.55       20.48     13.08 o 
   5   4   4      422.61      404.69     22.85 o 
   6   4   4       51.29       84.95     18.94 o 
   7   4   4      123.02       39.43     14.90 o 
   8   4   4      196.28      175.66     23.08 o 
   9   4   4        3.97        1.56     19.32 o 
  10   4   4       68.70       83.17     31.19 o 
  11   4   4      399.70      448.91    126.58 o 
  12   4   4      516.90      467.11     69.24 o 
  13   4   4      529.27      420.07     83.73 o 
  14   4   4       45.53      -65.54     65.54 o 
  15   4   4       23.96       54.26     72.72 o 
   1   5   4     1064.87      992.89     27.32 o 
   2   5   4        9.84       14.83     15.62 o 
   3   5   4      607.74      706.57     26.46 o 
   4   5   4      407.12      395.54     20.04 o 
   5   5   4      585.29      588.55     23.45 o 
   6   5   4      114.77      127.95     19.46 o 
   7   5   4     9102.12     8946.88    101.59 o 
   8   5   4      226.66      262.27     36.86 o 
   9   5   4      478.62      590.32     67.49 o 
  10   5   4      360.28      466.85     95.38 o 
  11   5   4        3.07       75.64     53.13 o 
  12   5   4       88.62       47.60     61.74 o 
  13   5   4      384.64      388.24     73.72 o 
  14   5   4      106.03      124.50     69.45 o 
   0   6   4      509.40      534.40     40.60 o 
   1   6   4      128.49      157.03     28.55 o 
   2   6   4       11.56      -13.30     20.05 o 
   3   6   4      101.43       76.90     19.62 o 
   4   6   4      308.04      288.11     25.62 o 
   5   6   4      431.27      409.90     27.88 o 
   6   6   4       38.69       11.67     31.71 o 
   7   6   4       72.80       71.66     43.03 o 
   8   6   4        4.10      -42.55     42.55 o 
   9   6   4      550.60      562.53     60.99 o 
  10   6   4       42.36      140.72     52.46 o 
  11   6   4       93.08       46.88     55.46 o 
  12   6   4        1.33      117.01     62.81 o 
  13   6   4       24.59      151.73     67.88 o 
   1   7   4       84.97       54.24     71.62 o 
   2   7   4     1126.48     1255.05     40.57 o 
   3   7   4     1165.46     1211.59     53.18 o 
   4   7   4       10.51       -4.45     24.79 o 
   5   7   4      253.18      260.70     35.33 o 
   6   7   4      284.61      320.35     44.52 o 
   7   7   4      907.52      964.54     55.88 o 
   8   7   4        0.84       30.82     41.22 o 
   9   7   4      132.66      111.63     47.16 o 
  10   7   4       90.75      104.12     58.08 o 
  11   7   4      355.24      431.29     69.98 o 
   2   8   4      115.46       51.35     59.46 o 
   3   8   4      226.17      220.45     54.73 o 
   4   8   4        0.82       31.88     37.75 o 
   5   8   4      170.06      173.61     37.77 o 
   6   8   4        2.17      -30.44     38.10 o 
   7   8   4        0.04       23.27     44.11 o 
   8   8   4        8.90      108.46     51.24 o 
   9   8   4      498.03      563.35     65.90 o 
   3   9   4       42.37      -64.86     64.86 o 
   4   9   4       58.01       53.34     73.65 o 
   5   9   4      164.72      176.35     63.06 o 
   1   1   5    12854.65    12513.85    110.79 o 
   2   1   5     4560.55     4712.67     46.79 o 
   3   1   5       59.38       58.20     13.05 o 
   4   1   5       36.45       53.14     14.18 o 
   5   1   5       65.35       22.12     15.37 o 
   6   1   5      161.99      150.98     17.96 o 
   7   1   5    23466.61    24300.84    214.93 o 
   8   1   5     2329.11     2283.03     48.82 o 
   9   1   5     1256.42     1284.28     44.49 o 
  10   1   5     3270.85     3193.10     74.79 o 
  11   1   5       23.25       43.16     33.56 o 
  12   1   5     5109.30     5050.81    132.17 o 
  13   1   5       38.68        9.94     37.97 o 
  14   1   5      352.79      303.05     61.48 o 
  15   1   5       40.92       20.47     45.63 o 
  16   1   5        8.22      -42.88     74.69 o 
   0   2   5      371.25      388.11     17.22 o 
   1   2   5    16188.22    15804.02    120.24 o 
   2   2   5     3073.17     3037.94     34.54 o 
   3   2   5     2917.22     2958.51     39.81 o 
   4   2   5     1408.48     1421.27     28.32 o 
   5   2   5      430.84      459.17     18.73 o 
   6   2   5     1291.49     1076.14     31.99 o 
   7   2   5       91.09       61.89     20.45 o 
   8   2   5     2633.78     2528.14     50.44 o 
   9   2   5        0.76       36.15     24.32 o 
  10   2   5     2032.76     2005.78     76.02 o 
  11   2   5     4433.97     4312.91     86.49 o 
  12   2   5      358.84      326.65     41.15 o 
  13   2   5      559.22      606.49     49.76 o 
  14   2   5       46.66       41.56     49.03 o 
  15   2   5        0.34      -49.63     53.44 o 
  16   2   5       21.64       21.00     73.03 o 
   1   3   5     1826.76     1701.08     23.53 o 
   2   3   5     3182.24     3129.55     32.12 o 
   3   3   5       24.06       28.18     11.40 o 
   4   3   5      395.84      423.20     20.86 o 
   5   3   5     3149.95     3245.79     53.02 o 
   6   3   5     4285.62     4210.69     63.13 o 
   7   3   5     2781.91     2799.33     50.71 o 
   8   3   5      126.57      131.00     24.02 o 
   9   3   5     1229.38     1471.40     50.32 o 
  10   3   5      940.33     1091.25     42.16 o 
  11   3   5       68.58       58.59     33.89 o 
  12   3   5       97.32       79.27     40.25 o 
  13   3   5       21.31       -6.56     45.60 o 
  14   3   5      262.08      332.82     71.79 o 
  15   3   5        0.75      -15.47     67.71 o 
  16   3   5      455.96      527.96     87.93 o 
   0   4   5       41.79       -0.69     19.65 o 
   1   4   5     1348.09     1303.01     29.28 o 
   2   4   5     3506.73     3740.93     48.10 o 
   3   4   5      836.28      758.52     19.45 o 
   4   4   5     4510.15     4345.48     51.36 o 
   5   4   5     1876.74     1780.82     35.86 o 
   6   4   5      363.10      330.04     21.76 o 
   7   4   5      378.50      420.28     36.87 o 
   8   4   5       37.65       20.77     20.75 o 
   9   4   5     1089.02     1154.88     43.03 o 
  10   4   5     2077.56     2076.40     69.46 o 
  11   4   5      294.62      331.90     60.42 o 
  12   4   5      449.62      432.87     67.03 o 
  13   4   5      213.31      134.89     64.24 o 
  14   4   5      123.16        6.67     68.07 o 
  15   4   5      187.78      219.90     77.62 o 
   1   5   5      165.92      166.42     15.60 o 
   2   5   5       46.47       51.05     16.79 o 
   3   5   5      730.41      732.81     27.68 o 
   4   5   5     1971.07     2055.08     39.70 o 
   5   5   5      116.56      106.64     17.98 o 
   6   5   5      614.25      626.27     25.81 o 
   7   5   5       98.44       54.63     22.02 o 
   8   5   5      153.10      182.87     47.59 o 
   9   5   5      721.83      684.88     62.45 o 
  10   5   5      961.08     1047.72     74.92 o 
  11   5   5      242.33      300.56     70.38 o 
  12   5   5       13.34       19.35     56.67 o 
  13   5   5       63.91       34.95     63.97 o 
  14   5   5       27.15       32.47     67.70 o 
   0   6   5     1140.46     1202.03     46.31 o 
   1   6   5      117.94      214.18     21.44 o 
   2   6   5     1098.41     1183.14     31.35 o 
   3   6   5        9.23       -1.46     19.53 o 
   4   6   5      535.75      548.02     29.78 o 
   5   6   5       23.28       -8.58     22.03 o 
   6   6   5      183.00      207.60     32.32 o 
   7   6   5      170.92      151.84     40.14 o 
   8   6   5      142.87      129.29     47.91 o 
   9   6   5       42.84       56.75     57.34 o 
  10   6   5       80.43      -33.95     56.22 o 
  11   6   5        3.14       -9.70     55.54 o 
  12   6   5       94.85      101.01     73.34 o 
  13   6   5      232.31      256.30     87.44 o 
   1   7   5       27.31       71.39     29.35 o 
   2   7   5      530.59      486.25     28.18 o 
   3   7   5       40.87       34.99     20.08 o 
   4   7   5      339.66      357.28     30.32 o 
   5   7   5        1.27       -7.52     50.13 o 
   6   7   5      566.99      455.75     49.20 o 
   7   7   5       92.48      158.73     47.35 o 
   8   7   5      252.14      327.08     55.13 o 
   9   7   5       26.68       79.70     47.18 o 
  10   7   5       33.25      -55.20     55.20 o 
  11   7   5      428.74      453.56     62.63 o 
   1   8   5        0.17      -51.35     51.35 o 
   2   8   5       10.72      -12.16     62.16 o 
   3   8   5       13.89       58.56     36.10 o 
   4   8   5      134.77      151.74     42.09 o 
   5   8   5       13.24        0.30     35.34 o 
   6   8   5        8.46       25.71     40.50 o 
   7   8   5       71.74      111.69     46.98 o 
   8   8   5        1.10       70.24     51.13 o 
   3   9   5       24.40       40.54     70.27 o 
   4   9   5      117.63      123.19     55.74 o 
   0   0   6    12549.92    12381.30    199.82 o 
   1   0   6    11104.41    11005.79    127.50 o 
   2   0   6    18123.06    17630.88    198.39 o 
   3   0   6    12062.64    11925.17    142.13 o 
   4   0   6     2678.23     2669.40     50.57 o 
   5   0   6      373.18      363.15     27.56 o 
   6   0   6    20083.98    20734.48    243.83 o 
   7   0   6      345.37      332.71     30.69 o 
   8   0   6     6528.70     6291.66    134.26 o 
   9   0   6      819.12      810.63     59.88 o 
  10   0   6      908.31      930.50     66.37 o 
  11   0   6     1077.98      986.47     73.03 o 
  12   0   6     2329.25     2390.24    107.72 o 
  13   0   6      511.50      488.39     68.13 o 
  14   0   6        1.21        1.85     61.30 o 
  15   0   6       29.97       77.50     74.90 o 
  16   0   6       22.50       68.67     71.68 o 
   1   1   6     7588.78     7499.28     66.87 o 
   2   1   6    11699.59    11627.53     93.33 o 
   3   1   6     1855.99     1823.46     28.23 o 
   4   1   6      934.61     1012.96     22.06 o 
   5   1   6     2054.47     2249.83     35.40 o 
   6   1   6     3871.76     4476.05     53.76 o 
   7   1   6      106.69       38.87     20.46 o 
   8   1   6     1969.70     1871.31     45.51 o 
   9   1   6     2115.68     2317.11     56.93 o 
  10   1   6       13.10      -16.86     30.84 o 
  11   1   6       33.52       67.34     33.88 o 
  12   1   6      285.38      221.81     41.12 o 
  13   1   6      118.07      155.62     42.71 o 
  14   1   6        2.12      -29.10     40.62 o 
  15   1   6      343.10      258.65     51.05 o 
  16   1   6      167.61      -12.67     61.33 o 
   0   2   6    53128.18    51375.60    547.51 o 
   1   2   6      275.97      271.95     12.90 o 
   2   2   6     4930.42     5097.82     54.48 o 
   3   2   6     2188.26     2287.30     34.69 o 
   4   2   6     4304.18     4567.08     49.59 o 
   5   2   6      172.91      218.73     16.71 o 
   6   2   6        2.07       19.75     18.03 o 
   7   2   6        0.15      -18.92     18.92 o 
   8   2   6     2989.11     2967.46     55.31 o 
   9   2   6      154.08      129.34     26.07 o 
  10   2   6     3489.71     3526.15     72.72 o 
  11   2   6       35.78      -12.31     32.36 o 
  12   2   6      933.12      985.46     54.52 o 
  13   2   6      419.13      390.32     56.63 o 
  14   2   6      569.58      480.31     61.39 o 
  15   2   6      271.71      188.63     58.00 o 
  16   2   6       19.06      -56.02     70.99 o 
   1   3   6      203.97      195.67     11.21 o 
   2   3   6     1781.67     1757.64     25.86 o 
   3   3   6     1525.34     1567.30     29.11 o 
   4   3   6       72.01       53.59     13.13 o 
   5   3   6      568.65      504.23     26.97 o 
   6   3   6     5251.43     4927.42     72.96 o 
   7   3   6      748.33      749.64     34.64 o 
   8   3   6     1041.73     1039.97     42.42 o 
   9   3   6     1555.83     1597.72     43.53 o 
  10   3   6     2059.35     2046.87     51.71 o 
  11   3   6      277.05      227.61     37.26 o 
  12   3   6        0.44        2.31     42.22 o 
  13   3   6     1161.31     1218.11     87.10 o 
  14   3   6     1585.56     1602.25    139.85 o 
  15   3   6      122.38      128.06     71.09 o 
  16   3   6      217.44      193.60     80.11 o 
   0   4   6      193.48      243.16     25.22 o 
   1   4   6     1659.69     1705.22     29.62 o 
   2   4   6     3864.70     4016.03     40.82 o 
   3   4   6     1710.55     1701.79     30.43 o 
   4   4   6     2654.42     2792.81     40.02 o 
   5   4   6       68.69       29.96     16.77 o 
   6   4   6     1610.20     1603.04     38.92 o 
   7   4   6      235.39      210.96     22.67 o 
   8   4   6       38.97       57.31     21.88 o 
   9   4   6      615.67      531.84     34.62 o 
  10   4   6      311.34      300.71     40.01 o 
  11   4   6      134.04      124.15     81.72 o 
  12   4   6      303.95      108.37     94.60 o 
  13   4   6      230.30      215.59     65.75 o 
  14   4   6       31.02      -34.59     65.22 o 
  15   4   6        0.01        7.17     72.07 o 
   1   5   6       14.90       25.81     16.24 o 
   2   5   6      154.92      178.88     19.56 o 
   3   5   6       30.52       50.15     17.62 o 
   4   5   6      236.84      257.81     20.95 o 
   5   5   6      472.44      539.51     24.66 o 
   6   5   6     1816.89     1857.44     38.24 o 
   7   5   6      347.73      311.53     25.16 o 
   8   5   6     1203.65      989.12     64.98 o 
   9   5   6      284.86      239.89     52.67 o 
  10   5   6       38.52       64.59     51.49 o 
  11   5   6      257.16      280.66     60.60 o 
  12   5   6     1722.59     1849.38    118.03 o 
  13   5   6      194.88      206.09     78.41 o 
  14   5   6       20.33       -8.03     67.98 o 
   0   6   6     2170.89     2095.38     54.65 o 
   1   6   6     1564.42     1614.90     46.54 o 
   2   6   6      222.50      246.08     21.33 o 
   3   6   6      280.33      288.35     24.07 o 
   4   6   6      605.52      596.91     30.96 o 
   5   6   6       15.77       19.44     22.77 o 
   6   6   6     1462.73     1394.56     54.09 o 
   7   6   6        1.12      -32.27     42.04 o 
   8   6   6      335.40      406.19     47.52 o 
   9   6   6       12.67       12.83     42.96 o 
  10   6   6        0.43       64.49     46.69 o 
  11   6   6       28.60      106.18     57.49 o 
  12   6   6      265.94      221.24     66.37 o 
  13   6   6       10.06        5.58     65.92 o 
   1   7   6        6.35       21.50     20.80 o 
   2   7   6      390.72      320.13     27.51 o 
   3   7   6       46.10       63.40     21.47 o 
   4   7   6      463.62      559.77     34.44 o 
   5   7   6      599.06      553.19     47.66 o 
   6   7   6      174.37      214.22     44.26 o 
   7   7   6      409.39      471.15     54.46 o 
   8   7   6      418.95      435.15     57.34 o 
   9   7   6      610.30      563.77     65.14 o 
  10   7   6      456.43      274.45     55.41 o 
  11   7   6       63.59       26.32     58.85 o 
   0   8   6       89.40       90.54     54.05 o 
   1   8   6        1.61       45.94     56.76 o 
   2   8   6      768.01      836.22     46.79 o 
   3   8   6       18.12       83.91     42.07 o 
   4   8   6       68.43       74.38     34.74 o 
   5   8   6       27.52       -8.34     37.09 o 
   6   8   6       17.99        0.72     41.65 o 
   7   8   6       53.37       54.33     46.51 o 
   8   8   6      560.16      674.04     63.63 o 
   2   9   6       14.63       83.78     66.21 o 
   3   9   6      102.23      107.89     47.07 o 
   4   9   6        6.26       30.07     54.06 o 
   1   1   7    20705.84    20365.07    160.28 o 
   2   1   7     2690.42     2625.21     33.53 o 
   3   1   7     3339.85     3433.87     39.48 o 
   4   1   7    22129.61    22080.81    172.83 o 
   5   1   7        1.08       17.64     14.93 o 
   6   1   7     1574.92     1504.68     35.88 o 
   7   1   7     1010.10      901.95     32.90 o 
   8   1   7     2530.22     2569.54     52.80 o 
   9   1   7     1444.62     1415.90     47.43 o 
  10   1   7      154.82      147.25     34.93 o 
  11   1   7      575.45      529.16     43.63 o 
  12   1   7      238.19      221.78     41.16 o 
  13   1   7       16.90       29.01     41.17 o 
  14   1   7      587.03      639.10     54.56 o 
  15   1   7       99.32      105.28     49.80 o 
  16   1   7      385.01      441.95     71.65 o 
   0   2   7    14624.85    14389.33    174.81 o 
   1   2   7       57.69       55.00     10.33 o 
   2   2   7     3844.22     3631.99     44.20 o 
   3   2   7     7642.01     7733.13     76.05 o 
   4   2   7     5727.02     6086.65     60.99 o 
   5   2   7     4074.77     4111.46     47.82 o 
   6   2   7       73.39       31.22     18.52 o 
   7   2   7      314.27      311.94     23.52 o 
   8   2   7      497.93      643.66     29.91 o 
   9   2   7      554.67      628.30     32.12 o 
  10   2   7      318.34      317.63     34.38 o 
  11   2   7        4.30      -24.55     33.14 o 
  12   2   7        4.35       -9.71     35.18 o 
  13   2   7       83.43      125.08     40.66 o 
  14   2   7      151.44      157.80     56.10 o 
  15   2   7       39.27      -52.97     52.97 o 
  16   2   7      249.78      206.11    106.50 o 
   1   3   7      542.93      530.93     14.46 o 
   2   3   7      275.12      293.47     14.02 o 
   3   3   7       42.97       71.20     12.71 o 
   4   3   7     5517.61     5702.95     73.74 o 
   5   3   7     5938.35     5836.68     74.61 o 
   6   3   7     2127.20     2094.58     47.56 o 
   7   3   7     2471.63     2394.18     55.26 o 
   8   3   7      642.43      656.60     30.85 o 
   9   3   7     1524.69     1546.36     46.88 o 
  10   3   7     2020.18     2103.77     52.34 o 
  11   3   7        8.60        5.51     31.32 o 
  12   3   7      223.22      218.03     44.17 o 
  13   3   7        0.93       16.58     61.04 o 
  14   3   7       91.12       43.21     65.45 o 
  15   3   7       75.59      -34.48     68.65 o 
   0   4   7     2756.80     2463.67     53.35 o 
   1   4   7       27.55       31.71     12.16 o 
   2   4   7     1539.39     1585.74     27.07 o 
   3   4   7      340.06      357.16     16.33 o 
   4   4   7      465.87      426.29     20.43 o 
   5   4   7     8381.25     8397.84     88.57 o 
   6   4   7       32.17       52.86     16.82 o 
   7   4   7      400.11      452.86     28.22 o 
   8   4   7       65.41       55.11     22.59 o 
   9   4   7     1637.72     1584.14     51.72 o 
  10   4   7      407.67      430.60     61.57 o 
  11   4   7       31.59       76.89     55.39 o 
  12   4   7      617.76      547.22     75.66 o 
  13   4   7      446.43      451.27     74.30 o 
  14   4   7        3.42      -63.79     63.79 o 
  15   4   7      441.95      407.86     82.90 o 
   1   5   7      643.53      690.76     26.28 o 
   2   5   7     3149.11     3013.45     49.14 o 
   3   5   7     1330.18     1278.71     33.77 o 
   4   5   7      175.35      202.90     18.77 o 
   5   5   7        1.01       24.57     16.89 o 
   6   5   7     1483.31     1570.92     36.07 o 
   7   5   7     1412.57     1554.14     38.68 o 
   8   5   7      575.51      651.79     52.11 o 
   9   5   7       66.73       84.77     48.67 o 
  10   5   7        7.04      -49.39     49.39 o 
  11   5   7        8.47       75.44     56.41 o 
  12   5   7      156.22      236.14     64.12 o 
  13   5   7       77.94       84.75     65.44 o 
  14   5   7       28.89      -13.54     67.90 o 
   0   6   7       20.63       37.31     25.83 o 
   1   6   7     2798.52     2870.61     46.27 o 
   2   6   7      420.24      400.34     24.67 o 
   3   6   7      545.80      465.95     27.69 o 
   4   6   7     1590.91     1649.01     49.39 o 
   5   6   7      119.72      148.74     28.55 o 
   6   6   7      663.95      665.09     51.51 o 
   7   6   7       11.24       22.72     42.94 o 
   8   6   7      134.64      191.93     43.59 o 
   9   6   7      130.05       96.90     46.58 o 
  10   6   7      597.80      437.09     56.74 o 
  11   6   7        7.09       28.96     70.21 o 
  12   6   7       79.75       53.77     55.57 o 
   1   7   7       24.32       -1.40     20.21 o 
   2   7   7      269.01      299.75     23.39 o 
   3   7   7      144.84      141.03     24.96 o 
   4   7   7       79.49       65.86     31.08 o 
   5   7   7       62.01       27.09     37.54 o 
   6   7   7        6.28       51.97     51.30 o 
   7   7   7     1314.48     1217.09     69.51 o 
   8   7   7      247.51      186.69     54.19 o 
   9   7   7       56.82       49.29     53.75 o 
  10   7   7       38.61       62.78     56.80 o 
  11   7   7        1.48      -53.95     53.95 o 
   0   8   7      896.05      937.81     83.78 o 
   1   8   7      855.00      650.99     54.64 o 
   2   8   7        4.62       41.39     41.21 o 
   3   8   7      354.33      418.09     45.50 o 
   4   8   7       76.61       58.52     35.69 o 
   5   8   7       44.00       71.19     46.03 o 
   6   8   7       86.71      131.81     44.87 o 
   7   8   7        3.93       62.46     47.41 o 
   8   8   7      289.93      301.18     57.32 o 
   2   9   7       35.86       87.84     70.27 o 
   3   9   7      512.51      435.88     58.06 o 
   4   9   7       37.37       55.29     41.48 o 
   0   0   8      525.59      488.33     32.35 o 
   1   0   8    17104.42    17224.42    195.94 o 
   2   0   8       43.02       66.33     19.71 o 
   3   0   8      505.46      552.68     25.86 o 
   4   0   8    19893.93    20292.84    234.58 o 
   5   0   8     2974.97     3285.44     59.84 o 
   6   0   8        0.25      -22.32     22.32 o 
   7   0   8      511.11      451.38     30.62 o 
   8   0   8    10172.40    10356.44    183.32 o 
   9   0   8        0.94       41.84     42.56 o 
  10   0   8        2.55      -15.90     42.08 o 
  11   0   8      347.51      357.99     64.95 o 
  12   0   8     1510.01     1573.05     92.13 o 
  13   0   8     5722.80     5863.08    227.23 o 
  14   0   8      121.29      227.91     65.19 o 
  15   0   8      226.46      222.58     72.92 o 
  16   0   8       17.93      -24.84     75.68 o 
   1   1   8       48.93       46.93     13.22 o 
   2   1   8     7013.33     7204.70     66.38 o 
   3   1   8     1368.91     1316.26     24.33 o 
   4   1   8       16.72       16.13     15.41 o 
   5   1   8     3121.52     3426.98     43.80 o 
   6   1   8     6587.82     7201.28     70.61 o 
   7   1   8    27584.31    28715.71    260.85 o 
   8   1   8      541.54      559.99     28.87 o 
   9   1   8       68.43       67.85     27.50 o 
  10   1   8        1.92      -31.10     31.10 o 
  11   1   8      292.43      264.93     39.35 o 
  12   1   8      371.47      407.88     45.34 o 
  13   1   8       18.54       43.47     43.71 o 
  14   1   8        9.95      -14.07     42.58 o 
  15   1   8       28.41      -35.63     46.64 o 
  16   1   8      308.30      230.50     68.08 o 
   0   2   8     1957.81     1882.07     45.30 o 
   1   2   8     3296.61     3247.19     42.85 o 
   2   2   8     8777.77     8815.24     83.39 o 
   3   2   8       42.61       15.27     12.60 o 
   4   2   8     3256.67     3219.02     45.68 o 
   5   2   8       40.24       -0.03     17.38 o 
   6   2   8      681.56      724.52     27.52 o 
   7   2   8      496.77      482.19     26.29 o 
   8   2   8        0.95      -16.87     21.35 o 
   9   2   8     1863.75     1903.10     47.43 o 
  10   2   8      823.53      879.64     41.31 o 
  11   2   8      234.39      261.86     36.29 o 
  12   2   8       35.56       37.86     35.07 o 
  13   2   8      135.53       65.31     38.56 o 
  14   2   8       41.61      138.77     47.53 o 
  15   2   8     1056.95     1127.41     97.88 o 
  16   2   8        0.00       38.53     74.67 o 
   1   3   8      485.61      516.26     15.87 o 
   2   3   8     6757.73     6606.83     61.12 o 
   3   3   8      628.46      630.04     19.04 o 
   4   3   8     5358.91     5500.47     77.41 o 
   5   3   8    21468.58    21402.82    255.44 o 
   6   3   8       50.19       41.39     16.73 o 
   7   3   8     2434.13     2532.40     48.25 o 
   8   3   8      222.67      202.29     25.86 o 
   9   3   8     7582.20     7466.65     93.72 o 
  10   3   8       54.57       -3.74     26.05 o 
  11   3   8      265.55      236.49     36.18 o 
  12   3   8       15.05       41.04     40.71 o 
  13   3   8      147.61       78.85     54.35 o 
  14   3   8       49.69       52.68     65.00 o 
  15   3   8       65.34      126.33     73.56 o 
   0   4   8     2335.69     2418.86     54.09 o 
   1   4   8     3036.22     3111.81     38.51 o 
   2   4   8      101.78      127.36     13.41 o 
   3   4   8     4181.46     4103.98     49.76 o 
   4   4   8       76.81       85.74     17.36 o 
   5   4   8        2.06       33.42     17.93 o 
   6   4   8     1679.11     1741.87     42.38 o 
   7   4   8      239.58      199.15     22.25 o 
   8   4   8     1021.67     1064.07     37.94 o 
   9   4   8      153.59       88.93     32.70 o 
  10   4   8       39.18       21.91     40.14 o 
  11   4   8      173.61      139.05     81.14 o 
  12   4   8      115.86       68.02     59.02 o 
  13   4   8        0.04      -17.92     60.07 o 
  14   4   8       61.68       52.64     67.58 o 
  15   4   8       12.43      -59.76     69.83 o 
   1   5   8     4021.38     4103.41     62.33 o 
   2   5   8        4.24       30.53     16.94 o 
   3   5   8      738.06      739.55     25.62 o 
   4   5   8        4.91        4.57     17.40 o 
   5   5   8     1653.39     1606.55     35.35 o 
   6   5   8     1149.22     1172.13     33.71 o 
   7   5   8     4497.12     4463.85     64.40 o 
   8   5   8       27.93       21.58     39.80 o 
   9   5   8      159.79      184.68     47.30 o 
  10   5   8       55.62      101.79     48.11 o 
  11   5   8      540.58      504.34     60.96 o 
  12   5   8      136.33       67.74     52.28 o 
  13   5   8      131.75      104.71     60.15 o 
  14   5   8        3.60      -18.26     59.94 o 
   0   6   8      568.15      589.17     37.26 o 
   1   6   8     1538.22     1553.96     53.70 o 
   2   6   8      216.28      176.22     22.82 o 
   3   6   8        1.02       26.76     23.41 o 
   4   6   8      250.69      298.87     25.24 o 
   5   6   8      137.90       96.96     30.01 o 
   6   6   8      162.50      138.36     43.00 o 
   7   6   8      143.32      124.94     45.33 o 
   8   6   8      486.22      437.98     56.45 o 
   9   6   8       17.55       78.73     45.26 o 
  10   6   8        2.37       -7.58     46.97 o 
  11   6   8      372.56      362.13     60.22 o 
  12   6   8       62.59       44.63     56.34 o 
   1   7   8     1429.89     1428.30     37.23 o 
   2   7   8        7.84       19.40     21.19 o 
   3   7   8      798.77      806.84     50.26 o 
   4   7   8      418.63      449.64     43.82 o 
   5   7   8      116.81      105.86     40.43 o 
   6   7   8       93.66      192.76     45.54 o 
   7   7   8      378.96      484.80     55.58 o 
   8   7   8        8.61      118.11     51.14 o 
   9   7   8       65.92       75.17     55.18 o 
  10   7   8      177.57      240.67     63.23 o 
  11   7   8        5.00        1.35    121.62 o 
   0   8   8      153.14      221.61     67.57 o 
   1   8   8        1.33       37.93     33.88 o 
   2   8   8      736.55      613.78     49.01 o 
   3   8   8      541.98      572.54     41.35 o 
   4   8   8       35.01       84.16     40.96 o 
   5   8   8       46.91      102.73     41.38 o 
   6   8   8       38.50       34.39     44.41 o 
   7   8   8       14.22       -0.99     47.48 o 
   8   8   8       20.86       95.59     53.48 o 
   1   9   8      111.79      139.18     68.92 o 
   2   9   8      167.60       87.50     45.78 o 
   3   9   8      184.77      211.37     42.66 o 
   4   9   8       15.81        3.94     44.25 o 
   1   1   9      622.16      623.47     18.77 o 
   2   1   9       84.80       84.18     14.77 o 
   3   1   9    12896.90    12368.42    103.41 o 
   4   1   9     3306.67     3252.87     41.56 o 
   5   1   9    21135.37    21388.28    176.85 o 
   6   1   9     4608.26     4996.77     61.65 o 
   7   1   9     8562.11     8748.50     94.74 o 
   8   1   9      106.03       92.65     22.27 o 
   9   1   9     2982.59     2940.07     62.37 o 
  10   1   9       57.34       -8.96     30.10 o 
  11   1   9     1526.35     1399.79     55.77 o 
  12   1   9        1.91        8.52     33.68 o 
  13   1   9       77.11        0.13     37.80 o 
  14   1   9        1.98      -12.45     40.12 o 
  15   1   9      101.43      118.51     45.30 o 
  16   1   9       59.80       73.92     54.83 o 
   0   2   9     2675.99     2767.40     86.93 o 
   1   2   9     1294.39     1415.76     31.78 o 
   2   2   9     7930.55     7703.44     77.08 o 
   3   2   9     2931.33     2994.95     40.19 o 
   4   2   9      585.62      572.45     20.35 o 
   5   2   9     9796.37     9820.08    106.03 o 
   6   2   9      514.26      479.23     25.13 o 
   7   2   9      655.09      643.43     28.77 o 
   8   2   9      388.94      448.19     27.10 o 
   9   2   9     2716.60     2733.77     56.02 o 
  10   2   9      387.11      433.95     35.21 o 
  11   2   9     1561.13     1443.25     56.85 o 
  12   2   9      662.98      635.60     46.90 o 
  13   2   9      150.14      119.97     40.07 o 
  14   2   9      103.36       41.49     46.72 o 
  15   2   9        4.54      -38.74     58.59 o 
  16   2   9       97.86       39.89     74.99 o 
   1   3   9     1305.47     1254.25     23.60 o 
   2   3   9        0.82       -8.15     12.41 o 
   3   3   9     3324.18     3333.22     48.71 o 
   4   3   9       16.50       -8.11     12.50 o 
   5   3   9      757.28      790.61     31.79 o 
   6   3   9      727.84      646.03     28.71 o 
   7   3   9        5.26       -6.66     20.42 o 
   8   3   9       38.77        0.65     22.97 o 
   9   3   9       24.87       22.13     24.91 o 
  10   3   9      169.92      169.63     31.01 o 
  11   3   9       10.07      -30.21     30.21 o 
  12   3   9      190.38      169.81     44.65 o 
  13   3   9      450.44      390.36     70.79 o 
  14   3   9      269.21      219.18     71.51 o 
  15   3   9      184.44      244.95     77.63 o 
   0   4   9     3090.63     3023.55     51.92 o 
   1   4   9      524.89      540.05     17.85 o 
   2   4   9      892.15      868.25     23.50 o 
   3   4   9       49.32       76.58     15.52 o 
   4   4   9     1137.87     1164.35     40.14 o 
   5   4   9      178.64      128.50     18.82 o 
   6   4   9     1177.83     1204.70     38.76 o 
   7   4   9      324.28      331.25     24.05 o 
   8   4   9      395.28      423.44     29.36 o 
   9   4   9      831.84      845.58     45.17 o 
  10   4   9     1567.62     1459.25     62.67 o 
  11   4   9      915.25      966.74     78.30 o 
  12   4   9      170.27      189.78     55.51 o 
  13   4   9      268.46      260.31     62.11 o 
  14   4   9      197.61      280.07     66.44 o 
  15   4   9      122.44      264.86    154.05 o 
   1   5   9     1524.68     1481.54     35.16 o 
   2   5   9      680.40      701.07     24.07 o 
   3   5   9        1.02       37.38     17.04 o 
   4   5   9      115.34      149.05     20.04 o 
   5   5   9      531.35      552.72     25.01 o 
   6   5   9     1276.12     1278.51     35.92 o 
   7   5   9     1917.22     1931.79     57.21 o 
   8   5   9      491.94      550.63     55.20 o 
   9   5   9       25.87      -34.26     42.40 o 
  10   5   9        0.01      -44.89     44.89 o 
  11   5   9        4.05      -24.00     46.59 o 
  12   5   9      802.40      794.37     70.76 o 
  13   5   9      222.59      211.26     68.87 o 
   0   6   9     1414.07     1400.38     54.93 o 
   1   6   9       92.06      107.48     22.41 o 
   2   6   9      234.59      245.62     31.83 o 
   3   6   9     1420.60     1595.61     44.68 o 
   4   6   9     1072.58     1072.59     36.10 o 
   5   6   9      508.66      525.38     40.05 o 
   6   6   9       74.81       93.55     42.75 o 
   7   6   9      364.06      437.37     53.61 o 
   8   6   9      363.13      430.87     57.19 o 
   9   6   9      454.28      482.58     61.82 o 
  10   6   9       12.44      -18.80     51.33 o 
  11   6   9       62.31      -12.92     52.14 o 
  12   6   9      329.75      236.47     60.80 o 
   1   7   9        9.08      -13.83     21.59 o 
   2   7   9      224.95      295.68     30.48 o 
   3   7   9      618.11      712.87     46.41 o 
   4   7   9     1367.01     1327.53     72.17 o 
   5   7   9      606.25      612.63     52.30 o 
   6   7   9        0.28        6.78     44.28 o 
   7   7   9       35.80       19.60     56.95 o 
   8   7   9        3.36       67.49     51.57 o 
   9   7   9       34.17       70.91     54.27 o 
  10   7   9      570.37      381.19     67.23 o 
   0   8   9      222.02      167.89     48.65 o 
   1   8   9      486.68      429.78     36.22 o 
   2   8   9       53.31       54.37     32.63 o 
   3   8   9       45.91      107.18     35.19 o 
   4   8   9      160.84      122.47     49.69 o 
   5   8   9      252.61      211.11     45.19 o 
   6   8   9       26.88      -21.96     44.17 o 
   7   8   9       26.84      -48.08     48.08 o 
   8   8   9        0.31      -36.87     50.98 o 
   1   9   9       18.98      -45.75     45.75 o 
   2   9   9        6.07        8.98     68.24 o 
   3   9   9      422.34      422.61     50.08 o 
   0   0  10      632.23      564.12     38.59 o 
   1   0  10     3970.85     3832.13     62.13 o 
   2   0  10    44476.02    45038.44    490.84 o 
   3   0  10       71.94       14.37     24.92 o 
   4   0  10      110.53       57.51     22.18 o 
   5   0  10    24709.84    25977.80    299.07 o 
   6   0  10     3080.30     3254.45     67.03 o 
   7   0  10      249.37      228.08     38.88 o 
   8   0  10      277.64      239.65     40.11 o 
   9   0  10      425.32      491.65     48.44 o 
  10   0  10       75.95      117.52     43.29 o 
  11   0  10      436.57      476.78     55.70 o 
  12   0  10     1852.13     1947.51     89.95 o 
  13   0  10      352.66      262.03     58.01 o 
  14   0  10      401.90      476.96     68.64 o 
  15   0  10      852.05      888.30     81.65 o 
  16   0  10       70.81       46.03     82.81 o 
   1   1  10     8501.52     8396.28     76.47 o 
   2   1  10      452.97      474.68     19.15 o 
   3   1  10      353.26      326.88     17.96 o 
   4   1  10    17164.75    17497.96    142.58 o 
   5   1  10     1792.10     1870.52     35.56 o 
   6   1  10      676.84      640.49     27.52 o 
   7   1  10      115.04       41.05     21.63 o 
   8   1  10      127.04      115.59     24.11 o 
   9   1  10     1040.55     1011.73     40.60 o 
  10   1  10       66.59       70.90     30.38 o 
  11   1  10      370.21      436.31     38.36 o 
  12   1  10       10.94       -0.40     33.31 o 
  13   1  10       57.86       56.58     36.66 o 
  14   1  10       53.15       51.75     38.45 o 
  15   1  10       69.03      132.41     47.87 o 
  16   1  10       24.31      -30.32     51.95 o 
   0   2  10    13581.21    13910.41    214.99 o 
   1   2  10      280.13      287.94     21.19 o 
   2   2  10      239.42      260.59     16.36 o 
   3   2  10     3581.05     3529.31     42.34 o 
   4   2  10     5732.69     5621.44     58.42 o 
   5   2  10     1234.24     1348.28     35.34 o 
   6   2  10      149.13      122.22     22.03 o 
   7   2  10     2041.70     2109.89     56.87 o 
   8   2  10      215.48      245.66     26.42 o 
   9   2  10      755.37      709.47     35.91 o 
  10   2  10      500.82      443.57     34.10 o 
  11   2  10       68.88       37.08     31.68 o 
  12   2  10      864.10      807.83     47.02 o 
  13   2  10      221.55      255.25     40.75 o 
  14   2  10      207.37      217.96     47.01 o 
  15   2  10      188.22      133.61     64.10 o 
  16   2  10       77.72       54.82     94.92 o 
   1   3  10      404.24      359.00     15.75 o 
   2   3  10    12611.43    12451.77    128.34 o 
   3   3  10     8082.16     8288.39    104.05 o 
   4   3  10     1136.25     1107.11     32.11 o 
   5   3  10      882.44      877.43     31.07 o 
   6   3  10      143.26      150.93     21.85 o 
   7   3  10        1.07       -3.90     20.78 o 
   8   3  10      537.29      560.79     30.62 o 
   9   3  10      153.83       96.82     26.65 o 
  10   3  10      320.48      332.19     35.03 o 
  11   3  10      167.54      230.47     36.50 o 
  12   3  10       24.55       14.76     40.49 o 
  13   3  10      329.50      355.55     61.20 o 
  14   3  10       26.59       37.27     58.94 o 
  15   3  10       80.47       69.93     62.91 o 
   0   4  10     2501.29     2586.06     54.61 o 
   1   4  10      799.71      886.76     24.43 o 
   2   4  10      188.05      230.53     18.48 o 
   3   4  10       33.07       48.00     16.26 o 
   4   4  10       82.39      116.14     19.06 o 
   5   4  10        0.06      -14.28     18.19 o 
   6   4  10     2185.80     2173.97     48.02 o 
   7   4  10      311.71      319.58     28.00 o 
   8   4  10     1274.63     1193.53     41.59 o 
   9   4  10     1011.89      890.38     46.21 o 
  10   4  10      314.59      272.02     46.66 o 
  11   4  10     1396.23     1269.59     75.00 o 
  12   4  10       57.14      117.25     53.43 o 
  13   4  10      299.07      283.99     62.69 o 
  14   4  10        7.27       22.98     60.67 o 
   1   5  10     1070.92     1135.47     29.89 o 
   2   5  10     1503.80     1476.34     32.16 o 
   3   5  10      640.75      646.27     24.42 o 
   4   5  10      423.36      440.49     22.03 o 
   5   5  10        4.97       23.26     18.87 o 
   6   5  10       25.63       67.93     21.60 o 
   7   5  10      421.46      400.89     54.81 o 
   8   5  10      301.18      285.45     65.25 o 
   9   5  10      117.38      210.76     71.57 o 
  10   5  10     1487.35     1291.67     74.10 o 
  11   5  10      795.81      763.42     67.19 o 
  12   5  10       21.20       85.86     64.11 o 
  13   5  10       69.04       10.70     58.47 o 
   0   6  10       17.55       54.75     33.00 o 
   1   6  10      563.20      536.09     29.28 o 
   2   6  10      426.41      425.98     27.75 o 
   3   6  10      176.28      224.52     23.88 o 
   4   6  10        3.04        6.39     26.45 o 
   5   6  10      145.33       40.72     36.14 o 
   6   6  10       42.31      -34.57     56.14 o 
   7   6  10      455.28      417.62     54.01 o 
   8   6  10      185.93      270.80     77.24 o 
   9   6  10       47.25       44.39     50.56 o 
  10   6  10      106.77      165.73     77.68 o 
  11   6  10       11.39       -5.02     58.73 o 
  12   6  10       46.95      102.55     82.11 o 
   1   7  10        9.75        7.70     23.77 o 
   2   7  10      309.73      278.68     41.32 o 
   3   7  10        6.36        3.14     35.67 o 
   4   7  10       45.42       37.99     37.72 o 
   5   7  10       40.05       38.25     41.65 o 
   6   7  10       56.06       84.75     46.25 o 
   7   7  10       72.67      -49.18     55.43 o 
   8   7  10      843.41      917.59     70.75 o 
   9   7  10       21.66       60.91     55.86 o 
  10   7  10       63.59       11.42     62.80 o 
   0   8  10      200.91      204.37     48.28 o 
   1   8  10       21.08       16.18     32.80 o 
   2   8  10        4.88       27.09     37.27 o 
   3   8  10        4.98      -35.69     35.69 o 
   4   8  10       20.44      -17.17     38.40 o 
   5   8  10       10.19       45.77     44.04 o 
   6   8  10      337.77      247.88     50.84 o 
   7   8  10      195.82      227.60     54.43 o 
   8   8  10       87.93       91.32     56.30 o 
   1   9  10       47.81      101.88     52.02 o 
   2   9  10       54.78      100.75     42.30 o 
   3   9  10       17.69        9.50     44.42 o 
   1   1  11    19197.88    18542.59    151.98 o 
   2   1  11      213.20      249.66     17.51 o 
   3   1  11      415.74      407.69     19.53 o 
   4   1  11      427.11      468.33     20.35 o 
   5   1  11     2286.00     2338.40     39.81 o 
   6   1  11      697.52      751.10     30.90 o 
   7   1  11      839.99      870.61     34.06 o 
   8   1  11     1748.57     1747.21     59.20 o 
   9   1  11       19.82       24.65     29.12 o 
  10   1  11     1831.53     1980.25     68.91 o 
  11   1  11        0.57       26.59     32.50 o 
  12   1  11     1127.24     1133.94     54.59 o 
  13   1  11        3.59      -34.92     34.92 o 
  14   1  11      280.88      286.92     44.62 o 
  15   1  11      155.34      215.90     49.95 o 
  16   1  11      419.45      483.26     63.75 o 
   0   2  11     1997.79     2013.50     45.36 o 
   1   2  11     6506.39     6454.93     63.40 o 
   2   2  11        4.42       12.32     14.69 o 
   3   2  11     2613.79     2772.22     48.06 o 
   4   2  11      461.51      423.77     22.98 o 
   5   2  11     1418.14     1302.38     35.17 o 
   6   2  11     1965.13     2064.18     45.28 o 
   7   2  11      612.25      629.73     31.32 o 
   8   2  11      217.58      196.62     26.26 o 
   9   2  11      917.75      900.71     38.98 o 
  10   2  11      134.00       92.22     31.93 o 
  11   2  11       75.10       52.01     34.12 o 
  12   2  11       52.96       10.05     33.69 o 
  13   2  11      411.08      461.48     48.29 o 
  14   2  11       86.56       75.69     44.38 o 
  15   2  11      102.65      156.51     67.09 o 
   1   3  11        0.96      -10.49     11.65 o 
   2   3  11       29.45       34.97     13.75 o 
   3   3  11     1324.36     1436.29     36.48 o 
   4   3  11       18.39       -6.40     14.14 o 
   5   3  11     1782.55     1820.73     47.03 o 
   6   3  11      303.37      355.09     25.50 o 
   7   3  11     5260.55     5264.44     75.63 o 
   8   3  11      495.91      598.55     31.74 o 
   9   3  11      118.89      110.78     27.61 o 
  10   3  11      528.60      513.18     38.41 o 
  11   3  11      363.24      393.79     40.40 o 
  12   3  11       92.03       65.67     43.31 o 
  13   3  11      382.26      366.23     63.62 o 
  14   3  11       69.64      197.36     62.02 o 
  15   3  11      166.73      175.49     69.14 o 
   0   4  11       58.99       61.21     22.99 o 
   1   4  11     8206.53     8219.03     87.42 o 
   2   4  11     5864.37     5895.70     68.83 o 
   3   4  11        7.40        1.51     17.12 o 
   4   4  11     3560.04     3595.26     53.89 o 
   5   4  11      596.02      613.99     31.47 o 
   6   4  11      694.58      657.31     31.21 o 
   7   4  11      209.91      169.46     21.74 o 
   8   4  11      543.99      564.96     34.03 o 
   9   4  11       22.44       -8.75     36.25 o 
  10   4  11      719.52      679.05     60.17 o 
  11   4  11      374.57      457.15     58.77 o 
  12   4  11      512.27      548.39     64.78 o 
  13   4  11     1106.27     1035.93    104.81 o 
  14   4  11        4.30      -44.33     60.06 o 
   1   5  11     2453.39     2406.96     40.91 o 
   2   5  11        0.38       27.00     20.55 o 
   3   5  11       12.50       -2.73     15.95 o 
   4   5  11       72.45       53.02     18.49 o 
   5   5  11     2818.07     2850.93     51.40 o 
   6   5  11       27.93       24.54     21.62 o 
   7   5  11     1175.25     1069.30     74.31 o 
   8   5  11      219.02      224.72     50.43 o 
   9   5  11      963.39     1032.85     74.13 o 
  10   5  11       67.87      132.27     56.44 o 
  11   5  11        1.20      -57.36     57.36 o 
  12   5  11        2.06      -55.70     55.70 o 
  13   5  11       21.25       -4.01     56.74 o 
   0   6  11     4737.93     4611.84    105.22 o 
   1   6  11      685.48      615.27     32.17 o 
   2   6  11      949.86      941.68     35.06 o 
   3   6  11     1360.79     1431.62     45.34 o 
   4   6  11     2412.22     2652.67     97.60 o 
   5   6  11      463.06      398.67     48.41 o 
   6   6  11      253.47      284.27     49.68 o 
   7   6  11       43.17       23.74     46.36 o 
   8   6  11      281.52      354.39     56.99 o 
   9   6  11      698.85      673.39     68.64 o 
  10   6  11      603.32      580.51     69.85 o 
  11   6  11      556.28      533.66     73.14 o 
  12   6  11      194.56      220.94     70.30 o 
   1   7  11      473.81      408.35     36.68 o 
   2   7  11      283.97      223.03     39.34 o 
   3   7  11      386.90      396.73     45.68 o 
   4   7  11        1.28      -37.54     37.54 o 
   5   7  11       13.98       42.37     42.61 o 
   6   7  11       96.73      149.93     48.54 o 
   7   7  11      205.05      174.78     51.41 o 
   8   7  11      113.29      142.48     54.08 o 
   9   7  11      262.89      231.77     61.88 o 
  10   7  11      145.87      150.98     61.09 o 
   0   8  11       48.75       64.47    125.67 o 
   1   8  11       39.80       65.52     37.25 o 
   2   8  11     1053.29     1053.74     54.63 o 
   3   8  11        4.98       19.06     38.72 o 
   4   8  11       55.94       35.88     41.71 o 
   5   8  11       11.79       41.42     44.46 o 
   6   8  11      172.18      180.98     70.83 o 
   7   8  11       27.48       46.47     56.76 o 
   1   9  11        2.72       10.28     40.27 o 
   2   9  11        2.89      -29.53     43.60 o 
   0   0  12    25729.71    24532.14    394.41 o 
   1   0  12     2774.24     2850.01     55.91 o 
   2   0  12      280.89      185.33     24.40 o 
   3   0  12     2316.20     2391.51     59.66 o 
   4   0  12     2501.72     2299.04     90.72 o 
   5   0  12     1959.36     1801.92     52.42 o 
   6   0  12     3246.77     3262.54     69.67 o 
   7   0  12      403.24      444.34     44.25 o 
   8   0  12    11177.88    10959.58    218.56 o 
   9   0  12      296.02      222.02     50.55 o 
  10   0  12     5873.62     6131.56    141.51 o 
  11   0  12        1.32       23.82     45.27 o 
  12   0  12      537.40      614.07     65.96 o 
  13   0  12       42.44       36.99     53.15 o 
  14   0  12      143.17       46.79     57.35 o 
  15   0  12      130.50      149.12     65.48 o 
  16   0  12       77.60        1.61     69.36 o 
   1   1  12      589.68      584.18     23.60 o 
   2   1  12       79.18       70.65     16.40 o 
   3   1  12      856.80      831.49     28.14 o 
   4   1  12     3671.45     3514.30     44.47 o 
   5   1  12      613.33      603.84     26.67 o 
   6   1  12     1013.90      899.00     33.14 o 
   7   1  12      265.40      340.45     27.31 o 
   8   1  12     1272.16     1228.20     44.44 o 
   9   1  12      377.59      368.95     36.19 o 
  10   1  12     3002.26     2973.31     71.49 o 
  11   1  12      540.68      501.79     41.26 o 
  12   1  12        0.44       -1.14     33.90 o 
  13   1  12       63.17       31.77     40.81 o 
  14   1  12      973.92      974.96     57.12 o 
  15   1  12       12.12       42.41     48.00 o 
  16   1  12       26.08       69.96     54.83 o 
   0   2  12    10862.01    11044.42    138.30 o 
   1   2  12     1109.80     1275.64     27.04 o 
   2   2  12    12886.26    12987.32    112.89 o 
   3   2  12     2053.61     2337.23     43.00 o 
   4   2  12       30.64       34.45     24.83 o 
   5   2  12      697.75      712.39     29.14 o 
   6   2  12     4169.89     4105.21     63.17 o 
   7   2  12      546.16      612.31     31.48 o 
   8   2  12     2780.19     2842.51     58.10 o 
   9   2  12       50.38       35.54     28.10 o 
  10   2  12       19.73      -29.37     29.37 o 
  11   2  12      169.77      134.01     35.60 o 
  12   2  12      645.09      599.73     47.20 o 
  13   2  12       26.08       -4.01     42.53 o 
  14   2  12        2.40      -45.34     48.56 o 
  15   2  12       85.95       29.84     60.72 o 
   1   3  12      685.88      717.53     26.55 o 
   2   3  12     6464.06     6037.81     84.76 o 
   3   3  12      308.47      237.21     28.45 o 
   4   3  12       18.66       15.85     14.28 o 
   5   3  12        8.45      -11.82     19.33 o 
   6   3  12       12.23       11.87     21.39 o 
   7   3  12      335.39      395.40     29.10 o 
   8   3  12     2232.22     2256.11     53.10 o 
   9   3  12      560.44      487.80     34.56 o 
  10   3  12        1.23      -30.27     30.27 o 
  11   3  12        2.64       56.58     37.00 o 
  12   3  12     3081.70     3115.33    135.17 o 
  13   3  12        0.00       30.76     55.52 o 
  14   3  12      349.68      452.34     69.58 o 
  15   3  12       14.64       88.00     65.92 o 
   0   4  12     3630.27     3662.29     71.42 o 
   1   4  12        0.42       26.16     17.01 o 
   2   4  12     3597.15     3765.83     52.88 o 
   3   4  12       18.01       31.58     17.98 o 
   4   4  12     2977.95     2929.42     49.77 o 
   5   4  12       96.88       53.73     19.28 o 
   6   4  12       46.26       31.54     19.16 o 
   7   4  12      770.64      797.33     36.22 o 
   8   4  12      238.18      185.87     29.96 o 
   9   4  12      126.94      193.20     41.22 o 
  10   4  12       10.26       25.72     51.59 o 
  11   4  12      310.79      274.67     62.93 o 
  12   4  12      164.44      214.35     58.78 o 
  13   4  12        6.12       12.44     56.76 o 
  14   4  12      360.98      268.46     69.31 o 
   1   5  12       53.49       60.39     16.77 o 
   2   5  12      798.72      876.77     26.42 o 
   3   5  12       24.31       36.08     17.52 o 
   4   5  12        1.29       -7.05     18.92 o 
   5   5  12     1410.35     1494.39     38.46 o 
   6   5  12     1849.35     1837.39     95.73 o 
   7   5  12      304.67      237.30     50.16 o 
   8   5  12       22.01       29.94     55.53 o 
   9   5  12       57.52       26.74     51.32 o 
  10   5  12      593.55      706.86     93.04 o 
  11   5  12      121.12      166.17     61.68 o 
  12   5  12        0.85       80.05     63.97 o 
  13   5  12      103.87      126.30     84.06 o 
   0   6  12       79.16      324.05     49.78 o 
   1   6  12       35.48       15.36     25.38 o 
   2   6  12       83.98       56.68     23.92 o 
   3   6  12      251.95      238.42     32.29 o 
   4   6  12       15.27      137.01     37.59 o 
   5   6  12       55.77       65.78     41.84 o 
   6   6  12       31.22      -17.58     42.22 o 
   7   6  12      150.03      105.90     49.59 o 
   8   6  12      266.66      321.40     55.56 o 
   9   6  12        7.27       47.12     54.00 o 
  10   6  12       34.85       39.43     63.00 o 
  11   6  12      274.37      202.36     66.05 o 
  12   6  12       10.79       35.43     66.09 o 
   1   7  12        2.33       21.50     35.47 o 
   2   7  12      119.25       87.55     37.04 o 
   3   7  12      226.39      273.58     43.85 o 
   4   7  12        4.29      -26.38     41.16 o 
   5   7  12       15.67       -4.22     43.46 o 
   6   7  12       63.27       68.77     47.60 o 
   7   7  12      106.02       45.87     50.44 o 
   8   7  12      130.99       96.32     54.55 o 
   9   7  12        1.56      -52.80     52.80 o 
  10   7  12       88.78       29.73     59.55 o 
   0   8  12     2045.58     2126.54     99.68 o 
   1   8  12      199.61      168.60     39.24 o 
   2   8  12      385.45      454.54     46.76 o 
   3   8  12      318.87      312.10     45.88 o 
   4   8  12      341.88      342.28     49.47 o 
   5   8  12        2.36       17.46     58.71 o 
   6   8  12       80.16       90.52     49.94 o 
   7   8  12       15.88       27.43     53.57 o 
   1   1  13    14771.70    14318.81    123.26 o 
   2   1  13      104.98       58.23     16.72 o 
   3   1  13       52.92       66.15     17.51 o 
   4   1  13      562.36      595.98     28.37 o 
   5   1  13     1308.36     1401.62     36.67 o 
   6   1  13     1281.11     1309.80     41.39 o 
   7   1  13     1638.66     1602.78     48.37 o 
   8   1  13      278.76      284.57     33.71 o 
   9   1  13      446.01      520.18     41.06 o 
  10   1  13      208.99      200.19     38.96 o 
  11   1  13      431.31      427.84     42.34 o 
  12   1  13      529.23      560.15     46.27 o 
  13   1  13       84.84       51.47     40.99 o 
  14   1  13      207.89      244.34     47.50 o 
  15   1  13      671.99      750.60     70.66 o 
   0   2  13       11.21       -5.34     24.71 o 
   1   2  13     4114.81     4751.17     53.52 o 
   2   2  13      384.54      404.27     23.39 o 
   3   2  13      138.13       84.10     19.62 o 
   4   2  13     1298.98     1360.43     39.50 o 
   5   2  13     9474.48     9617.54    106.50 o 
   6   2  13     1713.17     1647.45     48.25 o 
   7   2  13     2482.43     2427.07     52.66 o 
   8   2  13      268.37      255.62     29.29 o 
   9   2  13     1196.37     1394.50     54.86 o 
  10   2  13      318.33      285.57     39.85 o 
  11   2  13      581.80      554.45     44.67 o 
  12   2  13        4.63        2.51     36.94 o 
  13   2  13      164.98      128.89     48.99 o 
  14   2  13       50.83       12.17     54.01 o 
  15   2  13      102.81      183.31     79.77 o 
   1   3  13      753.73      829.60     40.37 o 
   2   3  13      162.82      107.44     20.44 o 
   3   3  13     2841.51     2801.82     49.80 o 
   4   3  13     1926.43     1885.12     41.11 o 
   5   3  13      344.80      337.25     24.26 o 
   6   3  13      775.37      820.28     34.46 o 
   7   3  13      657.50      702.52     38.09 o 
   8   3  13      950.36      968.64     39.26 o 
   9   3  13       52.00       43.27     28.41 o 
  10   3  13        6.33       -3.33     32.95 o 
  11   3  13     1426.58     1445.61     72.86 o 
  12   3  13        4.23       -4.13     45.16 o 
  13   3  13       29.82       87.35     57.18 o 
  14   3  13      173.74      205.53     65.40 o 
  15   3  13      222.52      181.88     69.00 o 
   0   4  13     1091.63     1198.72     43.92 o 
   1   4  13        9.62       19.95     17.69 o 
   2   4  13     4000.84     3855.86     54.87 o 
   3   4  13      495.38      479.72     26.07 o 
   4   4  13      224.12      261.44     23.46 o 
   5   4  13      340.68      319.05     26.84 o 
   6   4  13     1720.20     1756.24     49.15 o 
   7   4  13      343.95      260.20     26.76 o 
   8   4  13     1032.39     1131.02     64.31 o 
   9   4  13       62.99       87.97     45.63 o 
  10   4  13       78.22       71.87     53.94 o 
  11   4  13      149.54       32.40     56.87 o 
  12   4  13       52.16       17.97     62.54 o 
  13   4  13      508.85      732.19    147.20 o 
  14   4  13       56.56       29.44     70.37 o 
   1   5  13      149.71      133.04     18.96 o 
   2   5  13      616.09      727.22     26.28 o 
   3   5  13     1484.82     1555.70     36.56 o 
   4   5  13      384.04      413.97     24.56 o 
   5   5  13      942.57      956.46     33.26 o 
   6   5  13      409.89      417.29     53.87 o 
   7   5  13      166.89      176.00     49.26 o 
   8   5  13      406.71      428.78     63.97 o 
   9   5  13      401.26      422.74     61.24 o 
  10   5  13       74.20       64.71     62.41 o 
  11   5  13      123.91      125.07     61.68 o 
  12   5  13       74.29       12.80     64.15 o 
  13   5  13       13.80       26.96     67.25 o 
   0   6  13     6634.38     6839.38    122.52 o 
   1   6  13       26.45        6.94     29.18 o 
   2   6  13      147.54      130.82     30.71 o 
   3   6  13      244.70      302.59     39.66 o 
   4   6  13      483.64      465.45     51.10 o 
   5   6  13      651.84      679.08     57.53 o 
   6   6  13        8.74      -32.84     45.02 o 
   7   6  13        2.71      -21.66     46.22 o 
   8   6  13      454.92      475.86     62.03 o 
   9   6  13       86.89       22.56     54.55 o 
  10   6  13        3.11      -42.96     56.89 o 
  11   6  13     1324.42     1157.32     90.94 o 
   1   7  13      108.96      132.46     38.81 o 
   2   7  13      111.46      131.99     40.63 o 
   3   7  13      106.48       81.55     42.12 o 
   4   7  13       35.55       20.16     41.63 o 
   5   7  13      263.35      295.36     50.13 o 
   6   7  13       26.80       10.71     47.34 o 
   7   7  13        4.81      -30.47     54.42 o 
   8   7  13       80.64      112.50     55.15 o 
   9   7  13      289.36      299.89     64.81 o 
   0   8  13        0.06      -36.63     54.24 o 
   1   8  13       17.41       30.39     46.42 o 
   2   8  13      285.39      298.80     45.08 o 
   3   8  13      251.48      325.18     46.98 o 
   4   8  13        0.99      -42.98     44.05 o 
   5   8  13       98.92       33.00     48.76 o 
   6   8  13      321.65      279.96     55.47 o 
   7   8  13      103.11       34.08     53.73 o 
   0   0  14    16854.82    18755.61    429.49 o 
   1   0  14    46975.44    48887.13    614.56 o 
   2   0  14      962.35      882.49     36.47 o 
   3   0  14        5.75      -23.64     23.64 o 
   4   0  14     6397.84     6450.50     99.40 o 
   5   0  14     3233.40     3130.90     63.35 o 
   6   0  14      125.62      142.92     38.09 o 
   7   0  14     1292.51     1264.02     70.61 o 
   8   0  14     2342.06     2153.32     91.77 o 
   9   0  14       12.34      -44.90     44.90 o 
  10   0  14       46.82       35.74     48.81 o 
  11   0  14      399.80      459.86     66.66 o 
  12   0  14      112.34      265.21     61.88 o 
  13   0  14      167.21      193.02     61.80 o 
  14   0  14      115.97       57.24     66.23 o 
  15   0  14     2460.11     2728.49    138.47 o 
   1   1  14     1779.54     1860.59     49.68 o 
   2   1  14     8020.42     8286.86     81.07 o 
   3   1  14      710.82      812.13     25.93 o 
   4   1  14      465.07      451.90     25.00 o 
   5   1  14     4823.85     4904.74     67.29 o 
   6   1  14     1975.82     2043.49     55.74 o 
   7   1  14     1619.95     1637.84     66.58 o 
   8   1  14      210.58      214.23     34.81 o 
   9   1  14       98.89       46.31     33.70 o 
  10   1  14      176.10      160.40     39.08 o 
  11   1  14       36.74       56.68     38.61 o 
  12   1  14      548.34      447.58     48.56 o 
  13   1  14        5.80      121.41     44.88 o 
  14   1  14       27.19       46.55     47.69 o 
  15   1  14        0.56       39.56     57.38 o 
   0   2  14       65.61       50.76     38.36 o 
   1   2  14    12425.14    12661.32    129.78 o 
   2   2  14      798.29      893.89     29.74 o 
   3   2  14     4863.29     4781.63     65.24 o 
   4   2  14     1513.49     1424.11     37.78 o 
   5   2  14     1401.06     1402.60     37.58 o 
   6   2  14      124.18      180.76     29.76 o 
   7   2  14       44.76       62.87     25.41 o 
   8   2  14       31.45       47.25     27.72 o 
   9   2  14       45.62       15.73     30.71 o 
  10   2  14       12.43       -4.15     34.76 o 
  11   2  14      466.10      558.40     47.53 o 
  12   2  14        0.89      -15.54     39.04 o 
  13   2  14     2567.11     2587.34    155.85 o 
  14   2  14        1.44       59.86     59.73 o 
  15   2  14      105.11       63.59     76.02 o 
   1   3  14     9889.87    10074.05    118.51 o 
   2   3  14     3950.14     3809.37     61.31 o 
   3   3  14     1551.86     1466.86     38.78 o 
   4   3  14     1455.63     1372.62     36.98 o 
   5   3  14      332.77      354.66     25.47 o 
   6   3  14      101.27      106.85     24.46 o 
   7   3  14     1185.17     1154.05     40.38 o 
   8   3  14       91.61       72.34     27.24 o 
   9   3  14      292.78      189.35     34.87 o 
  10   3  14       73.00       82.40     35.78 o 
  11   3  14      185.96      207.11     48.00 o 
  12   3  14       31.84      119.35     64.95 o 
  13   3  14       28.37       16.50     67.76 o 
  14   3  14       25.08       46.92     68.52 o 
   0   4  14     1801.72     1959.88     55.07 o 
   1   4  14       54.06       34.46     18.60 o 
   2   4  14       18.65       21.05     17.55 o 
   3   4  14     3842.85     3849.28     60.34 o 
   4   4  14      660.21      601.19     40.01 o 
   5   4  14        0.58       -0.02     16.32 o 
   6   4  14      112.32      158.70     24.62 o 
   7   4  14     1120.73     1193.01     47.52 o 
   8   4  14        0.18       11.96     32.45 o 
   9   4  14      818.89      715.40     60.76 o 
  10   4  14       85.90       65.08     55.60 o 
  11   4  14       96.69      196.62     62.08 o 
  12   4  14       16.64       55.20     62.41 o 
  13   4  14      629.02      573.15     83.30 o 
  14   4  14       33.25      -68.17     70.19 o 
   1   5  14      511.78      568.54     27.06 o 
   2   5  14       22.60       38.02     19.33 o 
   3   5  14      246.46      269.24     23.82 o 
   4   5  14       13.30      -11.96     19.73 o 
   5   5  14     1023.60     1000.70     52.13 o 
   6   5  14      551.85      515.39     56.35 o 
   7   5  14      531.75      565.19     59.06 o 
   8   5  14      271.85       88.16     52.29 o 
   9   5  14      204.54      247.31     57.04 o 
  10   5  14        0.39       32.73     54.82 o 
  11   5  14        0.05      -57.51     57.51 o 
  12   5  14      292.85      209.21     69.76 o 
  13   5  14      331.49      293.04     77.80 o 
   0   6  14      989.36      992.76     66.79 o 
   1   6  14      105.83      124.88     32.33 o 
   2   6  14      126.61       49.35     35.14 o 
   3   6  14       62.86      -38.96     38.96 o 
   4   6  14      162.86      147.57     44.62 o 
   5   6  14      130.59      125.03     59.10 o 
   6   6  14       48.52        2.73     44.89 o 
   7   6  14       52.93       68.35     49.21 o 
   8   6  14       73.23       61.98     52.31 o 
   9   6  14        0.44      109.13     56.02 o 
  10   6  14        4.49       -6.35     56.69 o 
  11   6  14      305.73      366.63     71.61 o 
   1   7  14        2.99      -10.87     37.95 o 
   2   7  14      118.73       45.94     40.46 o 
   3   7  14      164.81       95.61     44.52 o 
   4   7  14       36.87       86.59     46.04 o 
   5   7  14      184.97      317.38     60.02 o 
   6   7  14       75.39      169.02     53.16 o 
   7   7  14      105.67      156.50     54.77 o 
   8   7  14      139.29      102.71     57.21 o 
   9   7  14       52.00       57.02     60.08 o 
   0   8  14      256.31      246.12     64.89 o 
   1   8  14       14.92      -12.30     39.90 o 
   2   8  14      101.09       71.09     42.73 o 
   3   8  14      153.61      169.53     47.39 o 
   4   8  14      319.77      262.48     52.19 o 
   5   8  14       72.62       39.16     50.01 o 
   6   8  14        0.79       33.69     57.54 o 
   1   1  15        1.14       12.49     16.89 o 
   2   1  15     5351.06     5569.14     62.92 o 
   3   1  15     8953.40     8834.33    104.51 o 
   4   1  15     3255.71     3235.34     73.21 o 
   5   1  15     9839.85     9797.07    108.03 o 
   6   1  15        4.66       -1.69     23.36 o 
   7   1  15      655.71      647.54     39.06 o 
   8   1  15      231.87      174.86     34.61 o 
   9   1  15      314.09      321.42     49.86 o 
  10   1  15     1714.77     1701.02     65.31 o 
  11   1  15      991.47     1020.24     56.89 o 
  12   1  15      738.67      816.66     55.41 o 
  13   1  15      403.70      439.34     52.38 o 
  14   1  15      146.35      147.49     55.92 o 
  15   1  15        1.04      -57.60     57.60 o 
   0   2  15        2.95       34.72     43.81 o 
   1   2  15        1.61      -18.49     18.49 o 
   2   2  15     2144.96     2128.04     43.34 o 
   3   2  15      626.69      712.28     33.78 o 
   4   2  15      886.97      827.51     31.70 o 
   5   2  15      236.55      206.42     24.26 o 
   6   2  15      403.58      365.86     28.98 o 
   7   2  15       17.30       -8.72     25.12 o 
   8   2  15      617.96      624.65     38.73 o 
   9   2  15      103.30      107.17     33.95 o 
  10   2  15     1137.66     1169.49     55.81 o 
  11   2  15       37.16       87.94     38.53 o 
  12   2  15      108.75      164.54     51.01 o 
  13   2  15      166.26       94.22     52.43 o 
  14   2  15       32.37       42.79     60.68 o 
  15   2  15      129.28       90.26     76.88 o 
   1   3  15     3060.04     3217.11     57.12 o 
   2   3  15      856.75      842.02     35.86 o 
   3   3  15      845.61      767.93     30.20 o 
   4   3  15      475.32      396.65     26.42 o 
   5   3  15      118.77      112.32     25.04 o 
   6   3  15      270.17      287.05     27.74 o 
   7   3  15      807.73      880.56     41.87 o 
   8   3  15       76.76       10.17     26.69 o 
   9   3  15       25.23       -9.54     32.26 o 
  10   3  15      497.97      620.47     46.62 o 
  11   3  15      241.15      330.88     52.35 o 
  12   3  15       15.50       32.33     58.58 o 
  13   3  15       12.28      -18.93     64.18 o 
  14   3  15       81.31      -10.16     66.51 o 
   0   4  15        0.15       43.72     24.47 o 
   1   4  15     1414.42     1401.79     54.63 o 
   2   4  15     4109.04     3931.07     65.30 o 
   3   4  15     1744.65     1724.60     45.36 o 
   4   4  15        7.32        2.46     17.09 o 
   5   4  15      674.35      651.53     40.42 o 
   6   4  15      152.90      144.46     24.15 o 
   7   4  15       26.57      -16.96     24.20 o 
   8   4  15      953.97      986.22     57.58 o 
   9   4  15     1639.74     1772.88     92.85 o 
  10   4  15       45.91       -9.54     55.92 o 
  11   4  15      368.10      345.42     76.07 o 
  12   4  15      194.93      207.23     68.89 o 
  13   4  15      129.10       44.89     87.19 o 
   1   5  15      980.11      933.64     30.72 o 
   2   5  15     1400.52     1527.46     38.06 o 
   3   5  15      491.83      543.39     27.63 o 
   4   5  15      122.00      118.25     22.79 o 
   5   5  15        0.93       68.76     48.37 o 
   6   5  15      477.16      455.32     56.20 o 
   7   5  15       88.17        5.62     47.14 o 
   8   5  15      829.27      776.66     69.11 o 
   9   5  15      328.34      283.95     62.98 o 
  10   5  15       94.27      152.01     72.36 o 
  11   5  15      481.74      530.65     75.51 o 
  12   5  15      331.67      300.10     73.29 o 
   0   6  15     7848.97     8141.99    234.51 o 
   1   6  15      301.54      396.24     71.78 o 
   2   6  15      267.84      338.76     51.69 o 
   3   6  15        2.82       18.20     49.35 o 
   4   6  15      507.49      388.63     51.96 o 
   5   6  15       41.66       32.94     45.07 o 
   6   6  15       36.84       -7.92     46.21 o 
   7   6  15      131.59      123.03     52.85 o 
   8   6  15      116.33       72.55     53.82 o 
   9   6  15      560.33      502.16     68.90 o 
  10   6  15      282.69      218.69     65.96 o 
  11   6  15      403.45      505.87     97.13 o 
   1   7  15      354.52      325.16     47.23 o 
   2   7  15      491.91      531.14     52.25 o 
   3   7  15       27.55       36.68     44.21 o 
   4   7  15      324.66      263.82     52.43 o 
   5   7  15        8.08       -7.59     47.40 o 
   6   7  15      959.08     1008.17     71.68 o 
   7   7  15       11.99       -5.50     51.80 o 
   8   7  15      274.11      343.80     64.94 o 
   9   7  15       43.24       36.16     65.14 o 
   0   8  15       30.72      154.68     64.45 o 
   1   8  15        9.76      -39.46     41.65 o 
   2   8  15      493.28      486.85     52.71 o 
   3   8  15        5.21      -21.50     43.91 o 
   4   8  15      112.51       57.36     48.87 o 
   5   8  15       55.27      127.58     52.08 o 
   6   8  15        0.45      -30.61     52.85 o 
   0   0  16     1384.03     1245.40     74.31 o 
   1   0  16      480.34      564.53     33.53 o 
   2   0  16      357.97      351.09     31.09 o 
   3   0  16      265.14      312.17     31.45 o 
   4   0  16    14845.34    14531.94    199.10 o 
   5   0  16     6752.53     6686.13    135.01 o 
   6   0  16       20.46      -44.67     44.67 o 
   7   0  16        1.46      -43.30     43.30 o 
   8   0  16       30.85      -36.94     44.30 o 
   9   0  16     4074.82     3968.41    125.06 o 
  10   0  16      423.09      330.60     60.80 o 
  11   0  16     1180.71     1188.98     85.02 o 
  12   0  16       29.52       -7.98     63.97 o 
  13   0  16       54.21      127.96     64.50 o 
  14   0  16      327.60      447.49     81.55 o 
  15   0  16       41.85      -20.52     74.82 o 
   1   1  16     6220.83     6489.38     74.67 o 
   2   1  16     5557.61     5958.41     76.50 o 
   3   1  16     2483.18     2463.86     48.58 o 
   4   1  16     1583.24     1555.00     41.34 o 
   5   1  16      284.67      300.20     25.51 o 
   6   1  16     1517.40     1481.03     45.18 o 
   7   1  16     2591.80     2655.46     65.44 o 
   8   1  16      318.44      261.25     37.39 o 
   9   1  16        3.00        8.60     34.70 o 
  10   1  16     1494.13     1452.02     61.59 o 
  11   1  16     1039.78      904.05     55.27 o 
  12   1  16       13.47       28.04     40.21 o 
  13   1  16      387.46      380.99     51.59 o 
  14   1  16       58.74       36.69     53.18 o 
  15   1  16      194.17      202.91     65.98 o 
   0   2  16       73.65      124.74     29.88 o 
   1   2  16       92.04      163.45     21.88 o 
   2   2  16     4814.60     4788.38     66.63 o 
   3   2  16      582.80      626.09     30.23 o 
   4   2  16     1393.14     1303.85     39.72 o 
   5   2  16     1170.11     1187.85     40.42 o 
   6   2  16     2740.53     2704.36     56.40 o 
   7   2  16      134.94      111.24     29.92 o 
   8   2  16      319.93      328.37     35.92 o 
   9   2  16        1.61        0.44     34.15 o 
  10   2  16      258.43      288.64     42.22 o 
  11   2  16     1191.40     1240.06     61.31 o 
  12   2  16      987.73      980.59     64.74 o 
  13   2  16       61.82       85.89     82.59 o 
  14   2  16       20.33       -9.31     68.27 o 
  15   2  16       28.18       83.18     78.67 o 
   1   3  16      162.24      151.31     21.75 o 
   2   3  16      976.35      908.73     31.66 o 
   3   3  16        4.27       13.99     20.91 o 
   4   3  16       91.37       30.22     22.35 o 
   5   3  16     3182.11     3211.52     56.63 o 
   6   3  16      585.96      609.12     32.80 o 
   7   3  16      565.13      678.34     35.88 o 
   8   3  16     2254.00     2192.87     58.64 o 
   9   3  16     4798.44     4813.11     97.63 o 
  10   3  16      824.01      839.30     63.78 o 
  11   3  16       22.63      -33.86     49.35 o 
  12   3  16      206.46      239.08     67.61 o 
  13   3  16        5.93      -55.28     62.69 o 
  14   3  16        0.41        7.50     93.04 o 
   0   4  16     1276.90     1357.89     62.35 o 
   1   4  16       59.87       54.96     18.56 o 
   2   4  16     1032.25     1050.41     37.85 o 
   3   4  16      525.66      541.06     31.69 o 
   4   4  16      412.11      428.14     31.53 o 
   5   4  16       11.73       22.19     21.58 o 
   6   4  16      705.94      717.42     36.48 o 
   7   4  16     1529.76     1455.52     58.35 o 
   8   4  16     1477.75     1281.62     71.06 o 
   9   4  16       56.53       69.48     54.41 o 
  10   4  16      121.29      -34.64     53.41 o 
  11   4  16     1054.87      842.66     81.02 o 
  12   4  16      122.93      197.14     68.97 o 
  13   4  16       13.01      -14.32     70.22 o 
   1   5  16       94.49       83.34     21.97 o 
   2   5  16       30.99       42.93     21.27 o 
   3   5  16     2835.13     2788.95     53.91 o 
   4   5  16        1.08       24.34     55.00 o 
   5   5  16     1891.87     1768.27     82.85 o 
   6   5  16      189.42      235.69     52.97 o 
   7   5  16        2.25      -19.56     50.12 o 
   8   5  16      469.33      383.37     61.69 o 
   9   5  16       74.77      230.27     77.04 o 
  10   5  16      528.79      554.72     72.73 o 
  11   5  16      511.54      484.99     75.72 o 
  12   5  16       51.96       17.79     65.35 o 
   0   6  16      225.59      426.73     68.31 o 
   1   6  16       36.69       32.04     39.84 o 
   2   6  16      254.51      313.60     48.20 o 
   3   6  16      302.32      354.29     49.53 o 
   4   6  16      612.30      649.41     59.11 o 
   5   6  16      135.44       79.68     48.41 o 
   6   6  16      516.04      510.68     60.06 o 
   7   6  16      483.17      456.23     61.23 o 
   8   6  16        0.01      -12.67     53.65 o 
   9   6  16       21.86       16.44     56.15 o 
  10   6  16        7.75       59.40     61.65 o 
  11   6  16       61.65       31.71     66.03 o 
   1   7  16      682.49      676.91     56.15 o 
   2   7  16      106.50       20.49     43.50 o 
   3   7  16     1139.56     1127.76     69.17 o 
   4   7  16      103.39       93.34     71.00 o 
   5   7  16        8.97      -22.09     49.92 o 
   6   7  16      335.66      299.44     59.16 o 
   7   7  16        0.05       31.68     61.44 o 
   8   7  16       29.50      -19.44     55.27 o 
   0   8  16      908.58      759.68     93.24 o 
   1   8  16      138.84      121.96     58.51 o 
   2   8  16      311.52      410.30     53.96 o 
   3   8  16        1.64       17.48     46.43 o 
   4   8  16       27.95       76.34     51.17 o 
   5   8  16      158.86      198.31     56.21 o 
   1   1  17     1477.15     1592.68     40.00 o 
   2   1  17     8859.99     8927.77    103.08 o 
   3   1  17     1590.83     1649.07     49.40 o 
   4   1  17     7679.32     7905.30     97.21 o 
   5   1  17      947.34     1018.24     37.41 o 
   6   1  17      318.90      320.96     33.50 o 
   7   1  17     3150.21     3098.14     91.62 o 
   8   1  17      891.54      878.48     64.61 o 
   9   1  17       12.59       18.28     36.52 o 
  10   1  17      127.43       72.44     38.44 o 
  11   1  17      312.28      303.57     44.95 o 
  12   1  17       16.98      -39.70     39.70 o 
  13   1  17       15.33       16.67     45.10 o 
  14   1  17      452.23      475.23     61.05 o 
  15   1  17      137.53      101.84     64.74 o 
   0   2  17       60.64      -14.97     29.07 o 
   1   2  17     9079.60     8840.44    101.81 o 
   2   2  17     5238.72     5038.65     70.33 o 
   3   2  17      731.29      761.34     31.91 o 
   4   2  17     1632.92     1607.60     42.91 o 
   5   2  17      222.99      239.98     26.00 o 
   6   2  17      426.69      412.61     29.96 o 
   7   2  17     2389.09     2384.79     58.54 o 
   8   2  17      897.50      824.39     45.81 o 
   9   2  17       82.57      105.08     35.59 o 
  10   2  17        7.73        3.72     36.71 o 
  11   2  17      675.33      654.48     51.43 o 
  12   2  17      886.49      861.36     63.63 o 
  13   2  17      267.37      305.40     67.09 o 
  14   2  17        0.39       17.95     69.49 o 
   1   3  17      826.16      848.74     31.74 o 
   2   3  17       54.01       73.22     22.19 o 
   3   3  17        9.04      -12.92     21.51 o 
   4   3  17      646.30      662.61     32.31 o 
   5   3  17      546.15      527.88     30.41 o 
   6   3  17      105.05      137.55     30.29 o 
   7   3  17      350.33      449.05     34.00 o 
   8   3  17      134.73      112.90     33.87 o 
   9   3  17      255.41      356.17     41.04 o 
  10   3  17      839.34     1017.22     78.86 o 
  11   3  17      131.63       41.89     51.71 o 
  12   3  17      601.96      565.22     77.25 o 
  13   3  17        1.43       11.34     66.93 o 
  14   3  17      182.01      260.00     81.14 o 
   0   4  17     4327.22     4229.10    162.92 o 
   1   4  17     1110.84     1084.42     43.53 o 
   2   4  17     1434.74     1485.87     70.90 o 
   3   4  17     1262.68     1300.30     43.18 o 
   4   4  17      455.14      466.68     30.25 o 
   5   4  17      344.46      344.13     34.58 o 
   6   4  17       73.33       25.44     25.38 o 
   7   4  17       63.64       48.87     50.19 o 
   8   4  17      126.01       78.92     55.04 o 
   9   4  17       60.98      163.30     57.67 o 
  10   4  17       98.99      100.29     59.75 o 
  11   4  17       20.92      100.91     61.59 o 
  12   4  17      287.12      365.42     75.64 o 
  13   4  17      286.46      228.48     89.92 o 
   1   5  17       81.91       40.78     22.12 o 
   2   5  17      425.23      419.01     29.66 o 
   3   5  17     1440.05     1238.25     69.54 o 
   4   5  17     1617.61     1525.17     86.99 o 
   5   5  17       29.65       95.81     48.25 o 
   6   5  17      139.08      101.92     50.28 o 
   7   5  17        0.59       -6.41     50.46 o 
   8   5  17       75.14       56.96     74.76 o 
   9   5  17        8.11       99.10     57.35 o 
  10   5  17      569.98      610.48     74.69 o 
  11   5  17       97.83      102.56     66.52 o 
  12   5  17      163.01      196.82     74.25 o 
   0   6  17      902.87      776.28     80.70 o 
   1   6  17      169.15      183.21     45.91 o 
   2   6  17      299.44      316.46     49.82 o 
   3   6  17      699.37      625.14     59.27 o 
   4   6  17       89.17      243.32     51.66 o 
   5   6  17      485.65      426.28     57.79 o 
   6   6  17      737.20      758.24     67.70 o 
   7   6  17       42.70       22.21     52.45 o 
   8   6  17      275.26      290.87     62.41 o 
   9   6  17       10.93      -64.17     64.17 o 
  10   6  17      347.81      344.05     71.74 o 
   1   7  17        4.71      -10.38     43.28 o 
   2   7  17      409.21      399.13     53.00 o 
   3   7  17      142.17      213.12     78.41 o 
   4   7  17       54.98       32.37     51.88 o 
   5   7  17      169.16      131.86     54.09 o 
   6   7  17        0.21       26.18     53.06 o 
   7   7  17      155.53      195.74     60.70 o 
   8   7  17        0.01        7.85     57.72 o 
   0   8  17        1.29      -59.74     63.28 o 
   1   8  17       67.08      146.76     48.73 o 
   2   8  17        0.67       74.11     56.37 o 
   3   8  17      134.85      150.69     54.42 o 
   4   8  17      462.01      487.51     61.92 o 
   5   8  17      101.58       89.19    110.81 o 
   0   0  18     4736.25     4613.10    117.83 o 
   1   0  18     1331.99     1493.14     52.93 o 
   2   0  18     4465.83     3983.45     97.16 o 
   3   0  18      353.99      303.33     41.53 o 
   4   0  18      767.74      623.20     53.68 o 
   5   0  18     4048.23     3737.50    109.83 o 
   6   0  18      323.29      295.08     50.49 o 
   7   0  18       11.64       72.99     47.27 o 
   8   0  18     5012.89     5195.79    144.42 o 
   9   0  18      114.26      120.06     53.91 o 
  10   0  18      687.22      637.28     69.51 o 
  11   0  18     1023.62     1050.68     97.72 o 
  12   0  18      267.54      234.18     65.82 o 
  13   0  18      127.54       86.90     68.48 o 
  14   0  18       22.44      194.95     72.77 o 
  15   0  18      122.87       -8.95     90.39 o 
   1   1  18      281.58      273.11     25.28 o 
   2   1  18      894.06      834.90     32.58 o 
   3   1  18      187.14      127.14     23.75 o 
   4   1  18     4738.74     4705.57     74.33 o 
   5   1  18     2665.21     2594.95     56.71 o 
   6   1  18       47.33       27.72     30.58 o 
   7   1  18      736.31      786.03     46.50 o 
   8   1  18      260.26      220.50     37.97 o 
   9   1  18     1770.12     1599.23     63.80 o 
  10   1  18     1077.72     1128.89     58.79 o 
  11   1  18      221.91      208.00     43.50 o 
  12   1  18       46.92       42.71     43.60 o 
  13   1  18        8.00       13.20     46.18 o 
  14   1  18      127.57      285.28     64.39 o 
   0   2  18     5204.96     4578.38     97.90 o 
   1   2  18       20.56       62.03     21.62 o 
   2   2  18      550.52      620.04     30.06 o 
   3   2  18       69.43       46.23     23.04 o 
   4   2  18      774.88      767.36     33.96 o 
   5   2  18      187.84      186.86     26.45 o 
   6   2  18     1514.15     1557.22     47.27 o 
   7   2  18        7.28       -4.11     30.88 o 
   8   2  18      367.30      369.49     40.38 o 
   9   2  18     1430.53     1537.85     62.35 o 
  10   2  18      153.73      163.81     40.35 o 
  11   2  18        6.65       15.14     39.54 o 
  12   2  18       68.01       -3.71     49.25 o 
  13   2  18       26.02       58.88     58.92 o 
  14   2  18       84.74       77.49     74.28 o 
   1   3  18     2517.77     2521.42     57.85 o 
   2   3  18      267.58      284.37     26.23 o 
   3   3  18      527.27      556.92     30.31 o 
   4   3  18       24.38       38.81     23.87 o 
   5   3  18     6451.88     6305.82     83.98 o 
   6   3  18    11030.73    11208.53    126.27 o 
   7   3  18     4014.85     3962.69     72.82 o 
   8   3  18     1069.47     1012.89     51.68 o 
   9   3  18        3.90      -29.88     36.31 o 
  10   3  18        4.46       -3.96     44.21 o 
  11   3  18      148.51       35.83     61.21 o 
  12   3  18      124.73       90.74     64.98 o 
  13   3  18      257.25      274.98     75.94 o 
  14   3  18      421.84      476.59     88.56 o 
   0   4  18     5636.26     5736.95    158.64 o 
   1   4  18      160.44      139.36     22.60 o 
   2   4  18     1288.73     1280.92     40.83 o 
   3   4  18      652.06      620.27     32.32 o 
   4   4  18      614.39      630.19     34.24 o 
   5   4  18     1156.50     1140.92     45.43 o 
   6   4  18       89.75       85.96     34.92 o 
   7   4  18        9.10       24.59     42.97 o 
   8   4  18       45.54       37.47     53.42 o 
   9   4  18       91.40       86.38     56.39 o 
  10   4  18      305.13      265.64     66.28 o 
  11   4  18      107.31      118.02     64.06 o 
  12   4  18       94.16       48.41     68.30 o 
  13   4  18       21.37       55.59     71.71 o 
   1   5  18       30.68       17.50     44.28 o 
   2   5  18        0.03      -27.39     50.52 o 
   3   5  18     1515.53     1546.31    107.66 o 
   4   5  18      665.95      697.13     61.85 o 
   5   5  18        3.34      -45.79     45.79 o 
   6   5  18       73.78       -4.54     47.70 o 
   7   5  18       78.14       60.93     51.48 o 
   8   5  18      939.51      847.13    124.63 o 
   9   5  18       63.48       44.77     57.09 o 
  10   5  18      199.18      203.85     66.14 o 
  11   5  18        0.32       35.70    118.23 o 
  12   5  18      605.31      756.24     90.60 o 
   0   6  18      192.16      138.51     75.00 o 
   1   6  18        8.14       45.75     43.03 o 
   2   6  18       44.16      -13.73     43.09 o 
   3   6  18        9.40       95.70     46.00 o 
   4   6  18      205.91      203.73     53.44 o 
   5   6  18      179.74      133.74     90.71 o 
   6   6  18       50.55       -9.48     51.18 o 
   7   6  18       28.08       87.43     55.69 o 
   8   6  18        7.20       27.77     55.80 o 
   9   6  18      116.16      155.28     62.89 o 
  10   6  18      841.39      866.81     85.02 o 
   1   7  18      612.15      604.83     59.04 o 
   2   7  18      188.57      216.21     51.44 o 
   3   7  18       11.06      -34.24     47.70 o 
   4   7  18       83.85       83.09     51.48 o 
   5   7  18       89.68       97.35     74.12 o 
   6   7  18       78.69       72.61     55.03 o 
   7   7  18      245.70      318.85     96.16 o 
   8   7  18      132.31      163.08     63.58 o 
   0   8  18      106.58       99.44     70.95 o 
   1   8  18        3.82        8.91     48.46 o 
   2   8  18       90.58      133.46     51.30 o 
   3   8  18       21.02       43.73     50.14 o 
   4   8  18        3.49       32.44     53.66 o 
   1   1  19     2971.30     2950.73     56.26 o 
   2   1  19     1092.12     1049.98     41.93 o 
   3   1  19      773.38      752.22     33.64 o 
   4   1  19       34.38       -0.14     25.14 o 
   5   1  19      492.60      430.46     34.90 o 
   6   1  19      531.65      493.10     39.87 o 
   7   1  19    10805.16    10932.39    160.51 o 
   8   1  19     1320.19     1367.39     58.23 o 
   9   1  19     2665.81     2719.76     80.33 o 
  10   1  19       38.24       61.50     39.11 o 
  11   1  19       50.83      -38.39     40.05 o 
  12   1  19      136.10      211.35     47.84 o 
  13   1  19       61.05        7.25     56.54 o 
  14   1  19      287.73      225.24     65.82 o 
   0   2  19     2152.08     2118.78     72.62 o 
   1   2  19      995.74     1010.69     35.93 o 
   2   2  19      525.60      536.48     30.33 o 
   3   2  19       89.89       76.12     24.24 o 
   4   2  19      372.23      431.57     30.45 o 
   5   2  19     1415.46     1433.78     44.79 o 
   6   2  19     2924.30     3017.97     97.74 o 
   7   2  19       13.38      -19.19     31.58 o 
   8   2  19     3821.75     3798.48     87.63 o 
   9   2  19      101.33      100.46     38.77 o 
  10   2  19        2.49       44.60     38.06 o 
  11   2  19       15.39       17.54     44.10 o 
  12   2  19      109.90       15.82     52.34 o 
  13   2  19      506.72      537.45     82.49 o 
  14   2  19      375.53      465.04     85.24 o 
   1   3  19     2661.74     2750.17     54.22 o 
   2   3  19      159.66      156.74     25.40 o 
   3   3  19       25.54        7.20     23.59 o 
   4   3  19        2.49       26.00     24.68 o 
   5   3  19     3309.76     3326.11     80.01 o 
   6   3  19     3892.24     3997.34     69.02 o 
   7   3  19      323.16      396.59     38.56 o 
   8   3  19      427.54      440.76     42.51 o 
   9   3  19      234.07      210.23     43.15 o 
  10   3  19       68.34       78.08     51.15 o 
  11   3  19       38.78       49.79     62.77 o 
  12   3  19       29.84      -30.04     69.63 o 
  13   3  19      324.16      164.20     72.88 o 
   0   4  19     1903.59     1969.59     73.83 o 
   1   4  19       31.42       18.01     21.56 o 
   2   4  19     1044.09     1043.85     41.99 o 
   3   4  19       25.91       35.88     20.85 o 
   4   4  19       38.60       18.82     22.82 o 
   5   4  19      432.91      396.72     46.92 o 
   6   4  19     1987.41     1861.34     80.42 o 
   7   4  19      837.48      774.82     88.70 o 
   8   4  19     1749.86     1657.71     93.16 o 
   9   4  19        3.27      -32.42     54.16 o 
  10   4  19        1.53       67.40     60.74 o 
  11   4  19        0.35       30.08    104.93 o 
  12   4  19      500.56      393.05     78.49 o 
   1   5  19        1.94       80.41     43.91 o 
   2   5  19      947.25      799.62     67.77 o 
   3   5  19     1037.05     1017.76     83.67 o 
   4   5  19      717.02      719.52    129.70 o 
   5   5  19      339.74      430.76     57.58 o 
   6   5  19      100.76      112.70     53.04 o 
   7   5  19        0.01      -73.14     73.14 o 
   8   5  19       55.65       76.97     78.21 o 
   9   5  19     1043.65      994.95     84.63 o 
  10   5  19       13.54      -59.64     60.72 o 
  11   5  19      430.05      506.31     80.86 o 
   0   6  19        3.67       40.64     65.41 o 
   1   6  19      214.34      157.37     47.59 o 
   2   6  19      243.17      268.32     78.21 o 
   3   6  19      129.96      171.25     51.69 o 
   4   6  19        2.02      -20.80     47.74 o 
   5   6  19       57.32        7.13     51.60 o 
   6   6  19       84.31       34.96     55.01 o 
   7   6  19       67.68       36.25     55.92 o 
   8   6  19       37.32       15.31     57.09 o 
   9   6  19      118.44       40.90     62.24 o 
  10   6  19        1.92      -19.90     67.68 o 
   1   7  19      219.50      199.41     68.82 o 
   2   7  19      128.86      160.40     50.43 o 
   3   7  19       66.04       41.64     50.69 o 
   4   7  19        8.68      -50.98     50.98 o 
   5   7  19        1.22      -11.45     52.67 o 
   6   7  19        9.09      -28.21     54.27 o 
   7   7  19      350.85      460.72     69.90 o 
   0   8  19      301.21      312.83    134.46 o 
   1   8  19        0.08       61.73     52.34 o 
   2   8  19        1.20      -38.40     48.92 o 
   3   8  19        0.22       -5.96     52.01 o 
   0   0  20     1873.33     1590.75    104.15 o 
   1   0  20     5591.58     5593.00    134.62 o 
   2   0  20       34.82       52.76     40.98 o 
   3   0  20     8191.35     8061.86    174.46 o 
   4   0  20     7059.04     6899.08    159.26 o 
   5   0  20     1440.88     1380.20     78.12 o 
   6   0  20        1.01       -5.11     43.74 o 
   7   0  20     4564.10     4603.29    136.78 o 
   8   0  20       31.44      -32.37     55.78 o 
   9   0  20        7.65      -34.91     51.36 o 
  10   0  20     1559.15     1424.30     91.19 o 
  11   0  20     1383.02     1545.98     99.91 o 
  12   0  20       48.32      -62.26     62.26 o 
  13   0  20     1350.11     1303.63    104.92 o 
  14   0  20       28.19      100.58     76.39 o 
   1   1  20      961.49     1001.87     36.48 o 
   2   1  20       67.87       78.70     25.60 o 
   3   1  20      124.35      133.02     28.41 o 
   4   1  20      191.76      173.60     31.17 o 
   5   1  20       97.36       53.48     32.15 o 
   6   1  20      506.44      490.61     42.19 o 
   7   1  20       50.63      -10.09     34.67 o 
   8   1  20      560.55      530.51     44.67 o 
   9   1  20      168.36       46.68     38.74 o 
  10   1  20      565.71      600.97     50.78 o 
  11   1  20      101.74       45.06     45.39 o 
  12   1  20       36.80       -6.33     43.54 o 
  13   1  20      131.16      128.26     54.55 o 
  14   1  20       20.92       25.26     62.64 o 
   0   2  20     1112.92     1082.07     52.80 o 
   1   2  20     1706.24     1879.31     46.85 o 
   2   2  20       24.20       37.54     27.31 o 
   3   2  20     2898.28     2911.27     57.84 o 
   4   2  20      816.53      851.77     38.91 o 
   5   2  20     7878.33     8048.48    118.26 o 
   6   2  20      436.50      461.62     39.61 o 
   7   2  20       75.89       62.00     35.25 o 
   8   2  20      130.73      141.10     38.51 o 
   9   2  20      379.56      443.57     46.12 o 
  10   2  20      127.01       86.78     41.12 o 
  11   2  20      967.97      869.38     62.08 o 
  12   2  20      129.21       23.70     59.14 o 
  13   2  20       18.37      -24.71     66.36 o 
  14   2  20        5.65       65.07     79.12 o 
   1   3  20     3359.08     3465.94     61.11 o 
   2   3  20       65.96       83.64     25.29 o 
   3   3  20      261.28      240.77     28.10 o 
   4   3  20     1456.66     1505.34     45.97 o 
   5   3  20      794.83      832.63     38.95 o 
   6   3  20      153.93      146.18     31.06 o 
   7   3  20      734.87      686.75     46.12 o 
   8   3  20      146.37      110.76     37.04 o 
   9   3  20      247.31      303.71     49.71 o 
  10   3  20       73.70       79.88     60.88 o 
  11   3  20       68.13       98.33     61.94 o 
  12   3  20       84.38      -29.26     67.06 o 
  13   3  20      315.36      401.07     83.86 o 
   0   4  20      225.51       86.03     49.66 o 
   1   4  20      303.74      353.57     30.59 o 
   2   4  20       90.00       79.13     22.40 o 
   3   4  20     1231.17     1207.85     43.85 o 
   4   4  20      225.00      165.75     29.92 o 
   5   4  20     3218.91     3136.18     80.88 o 
   6   4  20      202.27      244.46     48.81 o 
   7   4  20       90.84       65.30     54.19 o 
   8   4  20       21.92      132.62     64.95 o 
   9   4  20      457.99      490.93     69.49 o 
  10   4  20        3.25       57.60     61.68 o 
  11   4  20       43.04      116.17     68.02 o 
  12   4  20       96.83       80.02     70.72 o 
   1   5  20     1186.76      992.52     68.57 o 
   2   5  20      874.17      769.20     63.60 o 
   3   5  20     1701.80     1466.98     79.95 o 
   4   5  20      891.56      921.12     84.84 o 
   5   5  20      287.95      245.81     57.76 o 
   6   5  20      342.07      367.87     61.60 o 
   7   5  20      254.22      221.83     63.58 o 
   8   5  20        0.02       -3.49     56.82 o 
   9   5  20      754.61      818.89     81.52 o 
  10   5  20        4.44      -31.31     59.54 o 
  11   5  20     1340.36     1380.71    103.07 o 
   0   6  20      153.86      217.05     72.31 o 
   1   6  20      128.56       57.93     78.02 o 
   2   6  20        7.76        6.21     46.46 o 
   3   6  20      320.41      227.80     56.76 o 
   4   6  20      564.34      474.73     62.96 o 
   5   6  20       24.18      -51.38     51.38 o 
   6   6  20      119.13       67.00     68.66 o 
   7   6  20      139.42      117.77     59.22 o 
   8   6  20       32.95      145.78     60.24 o 
   9   6  20      156.11      171.86     66.84 o 
   1   7  20      228.47      272.75     55.93 o 
   2   7  20        2.53      -34.93     48.10 o 
   3   7  20      487.82      488.68     62.45 o 
   4   7  20       75.59       80.14     54.68 o 
   5   7  20      143.49      149.97     61.28 o 
   6   7  20      135.43      222.87     72.95 o 
   7   7  20      735.55      924.04     87.58 o 
   0   8  20       66.73       32.63     75.96 o 
   1   8  20      394.77      343.92     59.78 o 
   1   1  21     1393.48     1379.17     46.09 o 
   2   1  21     1851.63     1796.35     53.27 o 
   3   1  21     3631.87     3620.56     73.77 o 
   4   1  21      393.30      341.69     36.89 o 
   5   1  21       66.03       78.93     33.93 o 
   6   1  21     2524.20     2483.35     71.92 o 
   7   1  21      284.48      326.51     41.37 o 
   8   1  21       45.60       79.23     37.85 o 
   9   1  21      184.88      213.80     42.45 o 
  10   1  21        9.00       75.91     41.12 o 
  11   1  21      542.52      644.37     56.04 o 
  12   1  21      415.93      435.45     54.80 o 
  13   1  21      465.97      561.02     63.02 o 
  14   1  21      516.90      444.86     82.19 o 
   0   2  21       12.71        9.78     35.05 o 
   1   2  21     1614.14     1687.00     58.34 o 
   2   2  21        0.73       36.87     25.04 o 
   3   2  21     5843.43     5929.64     84.60 o 
   4   2  21     1599.81     1565.63     49.50 o 
   5   2  21       53.05       90.25     32.59 o 
   6   2  21      512.25      538.61     41.97 o 
   7   2  21      120.79      133.60     39.58 o 
   8   2  21     2745.24     2748.75     79.34 o 
   9   2  21     2136.07     2010.86     75.79 o 
  10   2  21        1.56        7.19     40.62 o 
  11   2  21       22.56        5.76     50.07 o 
  12   2  21       45.53       15.92     60.10 o 
  13   2  21        0.86      -68.53     68.53 o 
   1   3  21      209.73      243.75     28.53 o 
   2   3  21      749.37      701.25     35.54 o 
   3   3  21      104.76      113.43     27.30 o 
   4   3  21      330.84      317.10     31.72 o 
   5   3  21     4917.16     5059.84     99.62 o 
   6   3  21        4.28       31.62     33.52 o 
   7   3  21       28.94       47.57     40.18 o 
   8   3  21      573.25      609.17     51.21 o 
   9   3  21     1493.90     1546.34     86.02 o 
  10   3  21      741.78      737.57     81.19 o 
  11   3  21        0.38      -51.54     61.15 o 
  12   3  21        7.75      136.04     70.75 o 
  13   3  21       54.38       19.26     73.71 o 
   0   4  21     2033.25     2115.61     82.72 o 
   1   4  21      238.53      210.57     27.08 o 
   2   4  21      524.62      436.39     48.13 o 
   3   4  21      314.89      314.17     34.62 o 
   4   4  21      350.88      391.44     41.18 o 
   5   4  21      128.72      130.44     44.53 o 
   6   4  21       18.00       63.56     53.01 o 
   7   4  21      308.40      287.10     61.94 o 
   8   4  21       85.97       31.92     55.87 o 
   9   4  21      454.29      414.17     70.18 o 
  10   4  21      801.46      805.00     85.63 o 
  11   4  21      102.83       27.91     68.95 o 
  12   4  21       54.40       32.78     71.26 o 
   1   5  21      116.65      127.62     49.57 o 
   2   5  21      134.14      132.92     48.78 o 
   3   5  21      218.06      228.34     53.14 o 
   4   5  21      165.33      210.77     66.11 o 
   5   5  21        8.32       59.24     52.39 o 
   6   5  21      208.60      299.82     65.58 o 
   7   5  21      764.27      984.89     87.12 o 
   8   5  21      243.44      154.42     76.65 o 
   9   5  21        0.70       80.04     75.98 o 
  10   5  21       17.99       16.63     65.18 o 
   0   6  21       56.53       81.24     74.01 o 
   1   6  21       47.21       92.19     50.05 o 
   2   6  21     1305.60     1350.64     79.32 o 
   3   6  21      372.01      377.10     73.53 o 
   4   6  21      118.94      142.23     54.20 o 
   5   6  21        0.04      -52.98     52.98 o 
   6   6  21      110.59      118.51     59.71 o 
   7   6  21       59.73       44.85     58.96 o 
   8   6  21        6.59      -44.77     60.55 o 
   9   6  21       51.09       93.66     65.00 o 
   1   7  21        4.25       93.14     64.95 o 
   2   7  21       69.18       44.46     52.28 o 
   3   7  21      139.65      178.65     55.62 o 
   4   7  21        2.78      -15.73     54.88 o 
   5   7  21      122.15      142.19     60.07 o 
   6   7  21       46.59       24.56     67.10 o 
   0   0  22     9875.05     9801.52    287.61 o 
   1   0  22     2886.13     2734.48    120.76 o 
   2   0  22      742.47      676.37     60.81 o 
   3   0  22       27.09       57.33     45.00 o 
   4   0  22    11199.84    11034.36    225.65 o 
   5   0  22     1270.32     1154.16     76.81 o 
   6   0  22     2726.16     2779.83    107.56 o 
   7   0  22      472.21      387.29     70.22 o 
   8   0  22        3.06      -46.64     65.73 o 
   9   0  22      996.59      879.92     78.46 o 
  10   0  22     2751.84     2816.17    160.34 o 
  11   0  22     1065.25     1077.46     93.14 o 
  12   0  22      692.95      659.58     94.79 o 
  13   0  22       87.42      102.54     73.08 o 
   1   1  22       84.24      117.18     31.73 o 
   2   1  22       95.09      104.84     32.76 o 
   3   1  22        0.02        4.74     30.06 o 
   4   1  22      371.65      335.19     37.78 o 
   5   1  22     2940.55     2908.76     74.64 o 
   6   1  22     5635.96     5501.99    105.95 o 
   7   1  22     9666.53     9627.02    151.41 o 
   8   1  22     4203.68     4277.53     97.77 o 
   9   1  22      463.70      520.44     49.33 o 
  10   1  22       26.34      -26.85     40.70 o 
  11   1  22      268.26      326.40     50.08 o 
  12   1  22        2.69      -24.43     52.01 o 
  13   1  22       52.49       40.13     71.25 o 
   0   2  22     1189.08     1253.69     60.31 o 
   1   2  22      518.38      569.79     34.44 o 
   2   2  22      662.24      632.78     35.80 o 
   3   2  22       36.52      -14.00     29.85 o 
   4   2  22      856.83      916.35     46.15 o 
   5   2  22      375.80      411.19     38.75 o 
   6   2  22      185.03      204.23     37.72 o 
   7   2  22       19.21       26.00     34.65 o 
   8   2  22      978.02      896.79     53.95 o 
   9   2  22      184.04      195.44     42.17 o 
  10   2  22      111.15      125.08     46.64 o 
  11   2  22      925.82      894.64     78.72 o 
  12   2  22      138.96      133.23     72.53 o 
  13   2  22       39.11       47.84     75.54 o 
   1   3  22       79.73       89.70     27.21 o 
   2   3  22      408.84      452.07     32.66 o 
   3   3  22     1192.90     1198.64     43.37 o 
   4   3  22      235.03      227.44     31.32 o 
   5   3  22       40.84       57.02     32.73 o 
   6   3  22      544.51      538.21     44.60 o 
   7   3  22      400.00      265.35     63.16 o 
   8   3  22      545.03      454.43     60.78 o 
   9   3  22      548.64      588.35     64.08 o 
  10   3  22     1552.79     1581.20    102.13 o 
  11   3  22      326.35      203.09     72.32 o 
  12   3  22      508.38      681.57     87.75 o 
   0   4  22     2177.78     2286.61     90.09 o 
   1   4  22      153.48      148.89     32.51 o 
   2   4  22      401.75      408.39     48.92 o 
   3   4  22      410.49      346.39     44.19 o 
   4   4  22        3.09       86.31     44.43 o 
   5   4  22      156.25      176.44     57.19 o 
   6   4  22        6.04      -25.63     52.22 o 
   7   4  22        1.08      -43.05     55.54 o 
   8   4  22      379.38      314.00     79.92 o 
   9   4  22      114.86      127.06     63.90 o 
  10   4  22       10.49      -40.72     62.97 o 
  11   4  22      313.20      216.88     72.17 o 
   1   5  22      123.82       59.94     58.32 o 
   2   5  22       76.23       56.90     48.22 o 
   3   5  22       92.75      152.74     51.86 o 
   4   5  22      221.50      241.63     56.51 o 
   5   5  22       29.25      -18.43     52.39 o 
   6   5  22      194.19      190.72     59.16 o 
   7   5  22       15.78       27.75     58.09 o 
   8   5  22      826.99      798.11     81.49 o 
   9   5  22      120.00      174.75     68.87 o 
  10   5  22       43.49       83.43     68.02 o 
   0   6  22       21.55      -18.83     70.69 o 
   1   6  22      199.71      248.48     55.01 o 
   2   6  22       30.88       62.63     51.33 o 
   3   6  22       32.02        8.88     52.47 o 
   4   6  22      222.84      151.55     57.10 o 
   5   6  22      110.55       81.16     57.91 o 
   6   6  22      153.12      155.67     61.29 o 
   7   6  22       23.55      -39.22     58.12 o 
   8   6  22       59.76       43.21     71.78 o 
   1   7  22       28.77       18.23     53.20 o 
   2   7  22        7.40      -27.70     51.92 o 
   3   7  22        7.29      -35.82     52.80 o 
   4   7  22      296.36      401.08     65.69 o 
   5   7  22        4.47      -31.39     58.26 o 
   1   1  23      143.46       90.83     34.28 o 
   2   1  23     1131.27     1083.08     49.21 o 
   3   1  23     1640.71     1504.00     58.67 o 
   4   1  23      224.87      178.38     35.94 o 
   5   1  23     2132.00     2155.99    106.24 o 
   6   1  23      709.52      688.34     49.36 o 
   7   1  23      208.85      189.80     40.96 o 
   8   1  23      877.75      975.37     56.39 o 
   9   1  23        3.31      -38.90     38.90 o 
  10   1  23     1480.09     1405.30     69.72 o 
  11   1  23        3.35       30.79     46.83 o 
  12   1  23       27.39       24.70     53.37 o 
  13   1  23        4.92      -17.66     67.33 o 
   0   2  23        1.75       21.89     41.36 o 
   1   2  23      392.57      420.17     35.86 o 
   2   2  23     1312.09     1436.22     52.76 o 
   3   2  23     3649.86     3625.51     77.03 o 
   4   2  23      730.38      672.43     45.57 o 
   5   2  23      508.45      512.46     44.39 o 
   6   2  23     2072.89     1988.80     68.74 o 
   7   2  23       84.28       53.66     37.65 o 
   8   2  23      804.52      801.38     54.53 o 
   9   2  23      233.65      172.67     43.65 o 
  10   2  23        7.60      134.84     56.92 o 
  11   2  23      746.56      867.74     80.30 o 
  12   2  23      105.19      165.47     75.79 o 
  13   2  23      324.62      292.48     85.79 o 
   1   3  23        5.15       -0.46     27.27 o 
   2   3  23      109.00       41.36     31.65 o 
   3   3  23       55.49       29.47     28.20 o 
   4   3  23      265.93      229.78     37.17 o 
   5   3  23        0.25      -43.03     43.03 o 
   6   3  23       69.99      113.98     35.73 o 
   7   3  23      230.15      132.18     42.48 o 
   8   3  23      155.83       39.38     50.85 o 
   9   3  23      169.42      308.88     68.89 o 
  10   3  23        2.07      -50.88     60.76 o 
  11   3  23       73.83      155.66     71.95 o 
  12   3  23       61.88       69.26     73.83 o 
   0   4  23      969.85      931.00     79.29 o 
   1   4  23     2857.50     2831.23     84.59 o 
   2   4  23      427.09      522.73     48.18 o 
   3   4  23        9.13      -27.35     48.35 o 
   4   4  23     2500.31     2581.13    107.22 o 
   5   4  23      361.02      361.60     89.92 o 
   6   4  23      734.29      581.34     70.11 o 
   7   4  23      243.31      292.17     76.07 o 
   8   4  23      155.27      188.94     86.01 o 
   9   4  23      174.32       57.37     68.05 o 
  10   4  23      200.15      264.10     72.86 o 
  11   4  23       29.76       33.08     77.03 o 
   1   5  23        5.52       25.73     48.91 o 
   2   5  23       59.14       49.76     50.31 o 
   3   5  23        5.92       32.13     51.62 o 
   4   5  23        7.31       38.24     53.04 o 
   5   5  23      710.56      705.43     73.37 o 
   6   5  23      843.16      922.67    108.56 o 
   7   5  23      602.05      652.17     77.25 o 
   8   5  23      166.86      103.03     64.86 o 
   9   5  23       25.55        7.90     64.20 o 
  10   5  23       65.97       -5.94    101.03 o 
   0   6  23      108.57      152.42     77.77 o 
   1   6  23      701.90      681.39     68.46 o 
   2   6  23      522.98      587.72     65.78 o 
   3   6  23      507.90      591.99     67.50 o 
   4   6  23      333.07      312.30     65.49 o 
   5   6  23      920.52     1000.54     81.25 o 
   6   6  23      354.15      299.31     68.03 o 
   7   6  23       21.63       53.02     61.89 o 
   8   6  23       20.26       45.40     63.41 o 
   1   7  23       52.98      144.44     56.61 o 
   2   7  23       50.68       -0.78     54.42 o 
   3   7  23       75.87       46.57     78.21 o 
   4   7  23       35.89      -24.75     82.89 o 
   0   0  24    11887.74    12270.37    349.23 o 
   1   0  24       41.69       38.00     46.52 o 
   2   0  24     1401.43     1432.27     82.06 o 
   3   0  24     9651.43     9117.90    200.82 o 
   4   0  24    12614.29    12406.17    251.98 o 
   5   0  24      967.76      801.59     72.54 o 
   6   0  24      584.44      737.11     70.35 o 
   7   0  24      690.78      700.12     72.13 o 
   8   0  24      286.31      231.41     62.22 o 
   9   0  24      534.00      562.85     73.90 o 
  10   0  24     1219.79     1119.09    117.87 o 
  11   0  24       68.66       84.62     68.43 o 
  12   0  24        0.45      -37.13     67.72 o 
  13   0  24      344.83      276.28     83.69 o 
   1   1  24        5.63      -31.07     31.07 o 
   2   1  24      383.14      400.06     39.33 o 
   3   1  24     1528.39     1498.93     58.45 o 
   4   1  24      731.65      749.99     48.58 o 
   5   1  24      420.26      466.17     44.13 o 
   6   1  24     1057.16     1083.08     57.46 o 
   7   1  24       22.41        0.52     37.09 o 
   8   1  24       14.31       27.78     39.98 o 
   9   1  24      262.95      239.50     47.35 o 
  10   1  24       47.56       60.26     44.41 o 
  11   1  24      373.49      374.87     54.59 o 
  12   1  24      417.51      393.90     72.92 o 
  13   1  24       21.39       54.48     69.63 o 
   0   2  24     2802.86     2753.40     92.80 o 
   1   2  24     2233.63     2272.82     65.84 o 
   2   2  24     3946.65     3953.61     91.46 o 
   3   2  24      181.14      200.83     37.69 o 
   4   2  24     1082.57     1012.37     52.51 o 
   5   2  24        1.49       -1.56     34.86 o 
   6   2  24     1863.94     1910.78     69.89 o 
   7   2  24      198.45      168.22     41.38 o 
   8   2  24      790.35      795.98     54.45 o 
   9   2  24       78.17       98.44     47.00 o 
  10   2  24        1.66      -54.47     54.47 o 
  11   2  24      277.18      229.50     64.98 o 
  12   2  24      175.41      182.84     78.36 o 
   1   3  24       29.65       96.46     30.22 o 
   2   3  24      972.48      986.16     47.46 o 
   3   3  24     1205.32     1241.67     54.62 o 
   4   3  24     1175.23     1236.90     55.66 o 
   5   3  24       17.89       -2.56     33.76 o 
   6   3  24     1035.95     1043.31     58.91 o 
   7   3  24       61.89       36.54     51.49 o 
   8   3  24      368.88      291.85     74.12 o 
   9   3  24        1.03      -37.83     70.02 o 
  10   3  24      282.30      355.36     76.17 o 
  11   3  24      404.89      468.05     93.43 o 
  12   3  24      505.76      589.12    105.12 o 
   0   4  24      560.78      450.29    106.75 o 
   1   4  24      485.01      482.09     67.49 o 
   2   4  24      256.45      202.71     55.77 o 
   3   4  24      645.47      555.59     64.52 o 
   4   4  24      488.37      532.75     65.82 o 
   5   4  24       19.22       30.46     54.69 o 
   6   4  24       65.95      -67.68     67.68 o 
   7   4  24       24.91      -55.50     55.50 o 
   8   4  24     1168.35     1189.04     92.43 o 
   9   4  24      234.24      180.45     89.92 o 
  10   4  24       29.77      -46.23     65.97 o 
  11   4  24       95.03       79.09     73.94 o 
   1   5  24       19.07       24.97     50.80 o 
   2   5  24       18.78       49.22     52.14 o 
   3   5  24      144.49      146.16     64.75 o 
   4   5  24       34.23       83.73     60.84 o 
   5   5  24     1528.91     1569.93     94.75 o 
   6   5  24       27.00      -54.33     56.97 o 
   7   5  24       55.92       10.33     61.22 o 
   8   5  24       22.28      -53.47     60.95 o 
   9   5  24      360.72      435.86     79.40 o 
   0   6  24      177.63        4.41     76.81 o 
   1   6  24        1.17       -1.58     52.46 o 
   2   6  24       90.09       82.03     55.83 o 
   3   6  24      316.60      395.65     65.27 o 
   4   6  24       37.04        0.22     56.19 o 
   5   6  24       15.63      -19.01     57.29 o 
   6   6  24      145.70      217.91     66.20 o 
   7   6  24       38.89       38.46     61.48 o 
   1   7  24        6.69      -23.26     71.39 o 
   2   7  24       35.42      149.80     97.33 o 
   3   7  24      111.25      167.51     62.61 o 
   1   1  25      637.45      689.61     45.03 o 
   2   1  25       29.70       23.18     35.00 o 
   3   1  25      233.31      268.94     38.94 o 
   4   1  25      598.12      603.04     46.58 o 
   5   1  25      774.81      715.73     50.53 o 
   6   1  25      626.54      642.50     49.50 o 
   7   1  25      830.14      944.70     63.10 o 
   8   1  25      110.80      118.62     43.12 o 
   9   1  25      642.42      714.55     57.48 o 
  10   1  25      432.92      456.35     54.95 o 
  11   1  25        9.20      -47.99     47.99 o 
  12   1  25        9.60      -58.83     58.83 o 
   0   2  25     8076.57     7884.61    182.97 o 
   1   2  25       34.42       51.38     35.23 o 
   2   2  25     1051.24     1071.22     53.36 o 
   3   2  25      891.38      907.75     56.57 o 
   4   2  25     1035.71     1051.83     54.48 o 
   5   2  25      519.04      525.64     47.23 o 
   6   2  25      111.86      130.52     40.29 o 
   7   2  25      651.35      615.11     49.90 o 
   8   2  25        2.36      -11.69     39.27 o 
   9   2  25      914.83      981.72     65.92 o 
  10   2  25      101.94       35.53     59.19 o 
  11   2  25      520.54      495.79     83.28 o 
  12   2  25       17.95      -45.31     71.44 o 
   1   3  25      825.28      899.79     50.05 o 
   2   3  25        8.90      -16.63     33.19 o 
   3   3  25      473.36      596.33     45.21 o 
   4   3  25       57.58       93.86     35.51 o 
   5   3  25      134.57       94.81     41.44 o 
   6   3  25      302.38      360.19     59.32 o 
   7   3  25     1423.81     1570.39    117.31 o 
   8   3  25      107.89      129.01     64.62 o 
   9   3  25       13.42        7.32     62.25 o 
  10   3  25        0.21       65.59     66.77 o 
  11   3  25        5.93      -59.86    113.40 o 
   0   4  25      124.99      238.72     82.92 o 
   1   4  25      508.89      498.67     65.31 o 
   2   4  25     1018.73      984.97     78.17 o 
   3   4  25      226.55      193.85     57.71 o 
   4   4  25       84.41       93.99     55.81 o 
   5   4  25      284.88      310.50     63.13 o 
   6   4  25        2.50      -55.93     55.93 o 
   7   4  25      190.20      230.28     66.53 o 
   8   4  25      186.21      217.64     71.56 o 
   9   4  25      366.48      243.96     88.75 o 
  10   4  25        6.08      -43.37     68.96 o 
   1   5  25       10.64       71.72     56.56 o 
   2   5  25        1.28      -23.76     79.97 o 
   3   5  25      293.12      226.31     59.91 o 
   4   5  25      936.27     1022.65     83.10 o 
   5   5  25      147.91      129.19     62.30 o 
   6   5  25      622.80      543.94     83.68 o 
   7   5  25      449.76      386.25     75.69 o 
   8   5  25      121.70      118.82     68.50 o 
   9   5  25       25.12      -11.85     72.26 o 
   0   6  25       38.89       64.10     80.74 o 
   1   6  25       67.48      112.59     57.60 o 
   2   6  25      477.83      583.14     69.44 o 
   3   6  25      176.67       77.47     59.51 o 
   4   6  25      469.75      359.53     68.40 o 
   5   6  25       76.38      137.44     64.17 o 
   6   6  25      520.88      548.01     76.29 o 
   1   7  25      141.36      181.83    109.23 o 
   0   0  26     5454.18     5625.24    218.24 o 
   1   0  26        1.65      -23.95     47.70 o 
   2   0  26     2199.30     2125.01     98.60 o 
   3   0  26    10162.42     9432.86    210.59 o 
   4   0  26     1051.42     1077.69     78.63 o 
   5   0  26      607.86      710.23     77.07 o 
   6   0  26       35.91       47.39     55.01 o 
   7   0  26      568.83      640.78     94.01 o 
   8   0  26       26.69       -7.37     57.59 o 
   9   0  26      487.32      530.16     77.97 o 
  10   0  26       42.32       -3.95     68.07 o 
  11   0  26     4681.53     5047.77    172.87 o 
  12   0  26      149.24      310.97     84.98 o 
   1   1  26        5.47       50.09     35.31 o 
   2   1  26      229.02      215.75     38.38 o 
   3   1  26        2.37       41.28     35.66 o 
   4   1  26     1096.16     1036.56     54.92 o 
   5   1  26        0.60       25.16     36.38 o 
   6   1  26        7.50      -36.80     36.80 o 
   7   1  26        1.87       17.24     40.72 o 
   8   1  26       42.05       99.41     44.72 o 
   9   1  26      914.29      993.63     63.78 o 
  10   1  26      227.87      251.12     50.91 o 
  11   1  26        0.52       11.84     54.57 o 
  12   1  26       17.32        5.19     68.69 o 
   0   2  26       90.04      236.92     56.05 o 
   1   2  26     3925.35     3738.59     87.12 o 
   2   2  26      663.80      683.25     54.22 o 
   3   2  26       97.13      105.62     36.55 o 
   4   2  26      277.01      252.79     41.12 o 
   5   2  26       18.52      -13.38     36.92 o 
   6   2  26      206.43      205.12     43.14 o 
   7   2  26      618.22      615.54     52.34 o 
   8   2  26       89.84      150.81     48.14 o 
   9   2  26      307.66      243.91     61.01 o 
  10   2  26        2.22      -24.65     58.37 o 
  11   2  26      145.22      108.08     76.93 o 
   1   3  26      452.34      498.89     48.86 o 
   2   3  26      324.73      321.76     40.61 o 
   3   3  26       12.25       18.61     37.61 o 
   4   3  26      356.37      405.90     47.14 o 
   5   3  26        0.82      -43.26     43.26 o 
   6   3  26      182.41      161.41     54.52 o 
   7   3  26     1270.74     1425.53    121.71 o 
   8   3  26       97.25      183.18     70.06 o 
   9   3  26       31.67       53.28     67.22 o 
  10   3  26      249.33      317.15     78.74 o 
  11   3  26       89.11       52.01    126.19 o 
   0   4  26      768.76      617.12    100.64 o 
   1   4  26     1598.21     1519.00    130.09 o 
   2   4  26      527.29      501.43     68.34 o 
   3   4  26      342.90      362.91     65.15 o 
   4   4  26        5.39       14.34     55.54 o 
   5   4  26      376.74      443.79     69.37 o 
   6   4  26      283.27      255.83     67.83 o 
   7   4  26        4.75      -16.22     62.66 o 
   8   4  26       50.98       93.87     79.19 o 
   9   4  26        1.34      114.08     73.74 o 
  10   4  26      182.91      215.80     79.19 o 
   1   5  26      359.69      454.84     69.83 o 
   2   5  26        6.33      -41.21     56.18 o 
   3   5  26      897.72      840.70     78.55 o 
   4   5  26       76.64       43.32     58.16 o 
   5   5  26      313.38      276.07     66.79 o 
   6   5  26      194.81      251.11     70.25 o 
   7   5  26       15.52      -13.85     63.60 o 
   8   5  26       70.98      111.31     70.14 o 
   0   6  26     1171.94     1218.45    167.56 o 
   1   6  26      114.31      121.01     59.03 o 
   2   6  26        2.45       71.84     59.33 o 
   3   6  26      245.01       91.87     60.27 o 
   4   6  26      138.74      136.86     63.12 o 
   5   6  26       22.57       36.73     62.81 o 
   1   1  27     1245.14     1165.14     56.00 o 
   2   1  27      203.68      186.45     40.25 o 
   3   1  27     1299.02     1312.57     60.26 o 
   4   1  27       14.61       42.64     45.20 o 
   5   1  27      743.10      765.29     57.59 o 
   6   1  27      864.37      804.92     55.52 o 
   7   1  27      498.24      513.49     51.18 o 
   8   1  27        0.40      -40.97     40.97 o 
   9   1  27       18.46       33.44     46.56 o 
  10   1  27        4.19      -35.27     52.37 o 
  11   1  27      188.22      129.98     63.67 o 
   0   2  27    11833.50    11367.02    240.67 o 
   1   2  27      141.54      231.52     40.47 o 
   2   2  27      521.31      567.30     46.56 o 
   3   2  27       34.67       28.80     36.74 o 
   4   2  27      182.35      199.53     41.58 o 
   5   2  27      139.11      202.40     41.81 o 
   6   2  27       50.36      102.14     40.92 o 
   7   2  27      145.81       47.31     47.60 o 
   8   2  27      117.06      100.49     52.36 o 
   9   2  27      492.73      495.88     87.42 o 
  10   2  27       26.74       86.63     71.69 o 
  11   2  27       24.26       25.50     72.83 o 
   1   3  27      230.72      263.40     44.51 o 
   2   3  27     1264.68     1373.42     70.57 o 
   3   3  27      457.69      480.77     54.18 o 
   4   3  27      260.73      245.52     56.56 o 
   5   3  27      243.29      233.24     59.78 o 
   6   3  27       95.14      174.62     73.14 o 
   7   3  27     1150.31     1083.90     93.28 o 
   8   3  27      122.10      173.54     70.72 o 
   9   3  27        0.09      -63.66     63.66 o 
  10   3  27        2.57       29.45     83.59 o 
   0   4  27     2682.43     2632.78    179.72 o 
   1   4  27        9.89       63.03     56.30 o 
   2   4  27     1853.07     1818.52    100.40 o 
   3   4  27      189.69      107.52     61.21 o 
   4   4  27      412.57      316.42     68.33 o 
   5   4  27        0.90      -28.13     58.66 o 
   6   4  27      339.87      307.55     71.97 o 
   7   4  27       26.83       25.70     63.85 o 
   8   4  27      303.03      278.11     75.97 o 
   9   4  27      111.82      162.25     74.12 o 
   1   5  27       12.84      -61.12     67.10 o 
   2   5  27       50.77      -38.86     56.11 o 
   3   5  27      227.70      294.88    103.85 o 
   4   5  27       89.76       86.87     62.42 o 
   5   5  27      472.23      503.09     75.89 o 
   6   5  27       65.28      211.39     69.69 o 
   7   5  27       13.27       80.81     69.05 o 
   0   6  27      113.57      154.75     91.72 o 
   1   6  27      186.95      189.23     65.34 o 
   2   6  27       14.71      -38.61     58.12 o 
   3   6  27       54.61       74.11     61.79 o 
   4   6  27      216.65      207.64     66.91 o 
   0   0  28      932.62     1045.86    277.69 o 
   1   0  28     1621.82     1497.85     90.85 o 
   2   0  28     1879.98     1645.14     93.87 o 
   3   0  28     1150.02     1400.85     90.01 o 
   4   0  28     2333.71     2301.27    109.53 o 
   5   0  28       34.91      -51.70     51.70 o 
   6   0  28      107.15       96.12     61.27 o 
   7   0  28        9.49       16.15     66.51 o 
   8   0  28      121.38       56.07     66.42 o 
   9   0  28        6.76        8.60     64.08 o 
  10   0  28      814.19      931.12    127.75 o 
  11   0  28        2.09       14.16     77.05 o 
   1   1  28      692.49      807.91     52.27 o 
   2   1  28      730.19      746.28     51.96 o 
   3   1  28      463.55      549.99     48.52 o 
   4   1  28      898.25      861.67     54.09 o 
   5   1  28      689.26      720.13     52.62 o 
   6   1  28      251.34      206.09     45.90 o 
   7   1  28       35.38       67.80     44.10 o 
   8   1  28      650.20      648.12     57.09 o 
   9   1  28      108.54      159.00     54.20 o 
  10   1  28      320.09      244.49     60.44 o 
  11   1  28       17.99       32.52     71.23 o 
   0   2  28      133.39      441.66     63.35 o 
   1   2  28      157.32      184.10     40.14 o 
   2   2  28      978.87      981.65     55.86 o 
   3   2  28       39.21      -29.51     36.24 o 
   4   2  28     1533.07     1576.48     71.39 o 
   5   2  28        2.65       28.92     39.19 o 
   6   2  28      477.58      457.90     54.81 o 
   7   2  28      116.95      123.97     48.70 o 
   8   2  28      109.52      100.14     62.18 o 
   9   2  28       48.79       88.20     69.79 o 
  10   2  28      122.53       50.84     74.42 o 
   1   3  28     1163.05     1178.67     74.23 o 
   2   3  28      885.60      751.98     61.49 o 
   3   3  28       40.66       93.70     53.20 o 
   4   3  28      569.50      671.97     90.70 o 
   5   3  28      249.92      219.91     66.04 o 
   6   3  28     1056.30      903.12     87.21 o 
   7   3  28      474.75      556.03     79.54 o 
   8   3  28      489.59      576.03     82.97 o 
   9   3  28        1.41      -46.52     69.79 o 
  10   3  28       47.16       69.39     76.86 o 
   0   4  28      161.69      177.32     93.16 o 
   1   4  28      270.79      256.64     65.73 o 
   2   4  28       53.30       16.18     58.65 o 
   3   4  28       23.24      -66.18     80.55 o 
   4   4  28       47.71       88.22     63.66 o 
   5   4  28      435.11      437.19    102.80 o 
   6   4  28      104.48       48.48     63.99 o 
   7   4  28       36.53       11.07     69.65 o 
   8   4  28       17.03      125.35     85.04 o 
   1   5  28      124.50      182.76     64.47 o 
   2   5  28      346.90      263.71     92.12 o 
   3   5  28      575.79      616.82     77.77 o 
   4   5  28      238.40      307.66     70.65 o 
   5   5  28      151.27      186.85     70.52 o 
   6   5  28      156.37       98.69     76.26 o 
   0   6  28      155.32      155.24     95.32 o 
   1   6  28       64.54       44.33     62.20 o 
   2   6  28       73.18      192.39     78.99 o 
   3   6  28      324.02      236.36     69.62 o 
   1   1  29       22.53       83.55     48.44 o 
   2   1  29      341.53      317.13     49.57 o 
   3   1  29       74.81       88.07     40.20 o 
   4   1  29      176.46      139.25     42.44 o 
   5   1  29       97.65      100.37     50.88 o 
   6   1  29       30.73       -2.48     43.12 o 
   7   1  29       41.14       49.89     43.62 o 
   8   1  29      305.29      406.56     54.01 o 
   9   1  29        8.94      -15.41     53.12 o 
  10   1  29      782.18      918.43    122.38 o 
   0   2  29       42.23      152.97     57.98 o 
   1   2  29     2011.65     2035.62     77.83 o 
   2   2  29      160.03      144.06     41.23 o 
   3   2  29       90.46       68.16     40.52 o 
   4   2  29     1503.59     1536.54     68.64 o 
   5   2  29       52.22       33.53     42.76 o 
   6   2  29      427.80      515.08     55.92 o 
   7   2  29        3.70      -53.21     53.21 o 
   8   2  29        0.73       51.66     60.06 o 
   9   2  29       55.42       28.74     70.51 o 
  10   2  29      273.84      342.62     86.34 o 
   1   3  29       10.86        5.80     56.75 o 
   2   3  29      381.24      423.54     71.27 o 
   3   3  29      658.53      694.87     86.40 o 
   4   3  29      436.74      464.46     71.53 o 
   5   3  29        9.74      -58.77     58.77 o 
   6   3  29       16.80       40.54     64.42 o 
   7   3  29        0.24      -63.11     63.11 o 
   8   3  29      115.57      134.56     74.96 o 
   9   3  29      101.52       77.63     72.70 o 
   0   4  29      175.16       82.98     97.29 o 
   1   4  29       62.01       25.23     61.33 o 
   2   4  29      437.89      387.68     70.02 o 
   3   4  29     1090.19      915.76     84.57 o 
   4   4  29      239.03      279.80     70.26 o 
   5   4  29      137.50       10.39     64.50 o 
   6   4  29      877.15      862.99     91.94 o 
   7   4  29       25.58      -68.46     68.46 o 
   8   4  29      166.92      142.82     77.11 o 
   1   5  29        0.61       39.71     62.72 o 
   2   5  29       53.62       69.36     64.32 o 
   3   5  29        1.42      102.23     63.83 o 
   4   5  29      407.87      597.43     80.65 o 
   5   5  29       48.26       31.47     73.34 o 
   6   5  29        7.80        5.66     71.60 o 
   0   6  29      188.95      206.95     97.65 o 
   0   0  30       63.93       54.24     79.58 o 
   1   0  30      551.05      584.97     75.31 o 
   2   0  30      559.05      586.25     88.55 o 
   3   0  30       47.62      128.30     59.34 o 
   4   0  30     1638.27     1566.12    100.56 o 
   5   0  30      151.96      218.76     65.59 o 
   6   0  30      765.69      698.20     83.91 o 
   7   0  30       23.46       40.57     67.63 o 
   8   0  30     1313.13     1210.35    103.30 o 
   9   0  30      519.93      405.73     82.69 o 
  10   0  30       26.74       -0.72     77.32 o 
   1   1  30       20.97       50.67     43.29 o 
   2   1  30        2.97       60.04     41.83 o 
   3   1  30      807.05      806.05     57.03 o 
   4   1  30       67.17       41.26     42.40 o 
   5   1  30      111.05      142.74     44.51 o 
   6   1  30      299.83      271.04     49.29 o 
   7   1  30      484.15      546.14     57.46 o 
   8   1  30      276.90      322.38     58.21 o 
   9   1  30       77.70       41.67     56.95 o 
  10   1  30        2.96      -68.17     68.17 o 
   0   2  30      730.05      764.29     78.65 o 
   1   2  30      120.68      228.69     42.64 o 
   2   2  30      373.25      387.17     48.30 o 
   3   2  30      653.18      731.76     55.02 o 
   4   2  30      606.80      635.36     57.94 o 
   5   2  30       46.13        2.35     50.26 o 
   6   2  30       45.51       56.88     65.26 o 
   7   2  30       23.47        3.74     61.28 o 
   8   2  30      260.27      153.31     72.51 o 
   9   2  30       31.72        2.16     75.42 o 
   1   3  30      161.74      206.50     64.16 o 
   2   3  30       87.30       91.00     61.66 o 
   3   3  30      870.09      838.27     83.48 o 
   4   3  30      100.97      -51.21     61.57 o 
   5   3  30      103.45       23.22     64.62 o 
   6   3  30      501.88      616.75     82.77 o 
   7   3  30      144.13      175.16     72.49 o 
   8   3  30        0.15      -79.00     88.73 o 
   0   4  30       68.34      101.62     93.41 o 
   1   4  30      315.74      279.74     82.50 o 
   2   4  30      352.86      360.08     71.79 o 
   3   4  30      237.51      328.65     74.12 o 
   4   4  30       54.94       71.93     65.99 o 
   5   4  30       40.04       39.45     66.78 o 
   6   4  30       49.28      106.26     71.92 o 
   7   4  30      112.29      123.09     76.50 o 
   1   5  30        0.23      -60.30     60.30 o 
   2   5  30      218.92      144.61     68.55 o 
   3   5  30      817.79     1015.74    121.51 o 
   4   5  30      172.28      177.94     72.26 o 
   1   1  31     3912.21     3862.75     98.30 o 
   2   1  31      378.98      338.42     48.62 o 
   3   1  31      116.36      150.28     45.26 o 
   4   1  31      660.92      745.82     58.17 o 
   5   1  31       56.50       71.11     45.35 o 
   6   1  31      706.40      700.31     60.72 o 
   7   1  31      266.03      350.55     60.42 o 
   8   1  31       14.19      -27.25     54.19 o 
   9   1  31      246.16      243.72     73.45 o 
   0   2  31      432.11      498.66     79.39 o 
   1   2  31        5.17       25.83     45.81 o 
   2   2  31       12.19       17.60     45.71 o 
   3   2  31       15.95       23.58     49.70 o 
   4   2  31        9.39       99.80     52.35 o 
   5   2  31      605.23      499.77     69.30 o 
   6   2  31       10.85      -53.81     53.81 o 
   7   2  31      286.61      311.64     79.97 o 
   8   2  31        0.93       50.00     74.62 o 
   1   3  31        9.41      -50.64     60.68 o 
   2   3  31       38.07      158.64     65.76 o 
   3   3  31      270.43      303.84     86.66 o 
   4   3  31      128.10      -18.81     65.01 o 
   5   3  31      412.17      492.93     78.18 o 
   6   3  31       94.20       72.09     69.41 o 
   7   3  31      498.03      429.87     83.50 o 
   0   4  31      118.53      182.69     98.29 o 
   1   4  31       49.59       42.98     64.99 o 
   2   4  31      173.65      239.52     85.43 o 
   3   4  31        0.09      -29.64     63.68 o 
   4   4  31        1.00        0.09     65.29 o 
   5   4  31       46.79       68.07     70.13 o 
   6   4  31       34.90      -10.78     71.40 o 
   1   5  31      221.66       98.45     70.19 o 
   2   5  31        3.52       75.37     69.49 o 
   3   5  31      113.89       50.51     71.73 o 
   0   0  32        2.14       29.68     88.20 o 
   1   0  32     1747.05     2110.16    113.96 o 
   2   0  32        5.03       -7.73     60.61 o 
   3   0  32      204.90      262.21     70.76 o 
   4   0  32       20.08      -24.52     74.51 o 
   5   0  32        6.61       -7.36     68.20 o 
   6   0  32      450.49      672.13     88.93 o 
   7   0  32        5.88       81.70     77.24 o 
   8   0  32      391.89      408.28     84.51 o 
   1   1  32        1.69       23.35     43.05 o 
   2   1  32      993.04      948.17     61.75 o 
   3   1  32      831.54      768.52     59.52 o 
   4   1  32      474.01      582.42     55.57 o 
   5   1  32      221.48      198.94     49.52 o 
   6   1  32      220.45      189.38     56.35 o 
   7   1  32      361.72      430.63     63.23 o 
   8   1  32        0.58      -51.35     67.03 o 
   0   2  32       43.52       22.56    106.92 o 
   1   2  32      130.43       67.01     52.07 o 
   2   2  32       38.09      -15.29     51.09 o 
   3   2  32      422.11      347.46     60.46 o 
   4   2  32        3.19      -49.37     55.77 o 
   5   2  32      453.56      591.02     83.09 o 
   6   2  32        0.96       35.67     72.05 o 
   7   2  32      279.93      283.45     82.59 o 
   8   2  32       20.11       20.15     78.87 o 
   1   3  32     1628.27     1537.46    104.40 o 
   2   3  32     1203.18      994.46     91.37 o 
   3   3  32       49.34      109.43     70.24 o 
   4   3  32      102.65      118.99     70.23 o 
   5   3  32       76.01       24.14     70.36 o 
   6   3  32       27.05      -69.57     69.57 o 
   7   3  32      228.61      396.64     85.44 o 
   0   4  32        3.94       11.73     94.08 o 
   1   4  32       81.57      104.67     70.53 o 
   2   4  32       27.39      -62.41     66.02 o 
   3   4  32        2.06      -38.52     68.71 o 
   4   4  32       15.77      -30.03     67.40 o 
   5   4  32      143.52      192.46     78.06 o 
   1   1  33      150.26      230.89     48.63 o 
   2   1  33      133.04      169.36     48.50 o 
   3   1  33      515.91      559.04     56.68 o 
   4   1  33       74.33      111.17     48.04 o 
   5   1  33      498.37      546.52     63.77 o 
   6   1  33      265.03      291.17     59.61 o 
   7   1  33      250.80      328.28     75.54 o 
   0   2  33      186.34      255.98     81.04 o 
   1   2  33       63.52      107.04     55.45 o 
   2   2  33       57.04       20.93     58.92 o 
   3   2  33      140.39      126.13     69.58 o 
   4   2  33        1.29      136.15     69.42 o 
   5   2  33      380.07      305.55     76.69 o 
   6   2  33       21.20       30.33     74.11 o 
   7   2  33        8.80      -75.06     75.06 o 
   1   3  33      191.52      396.14     79.97 o 
   2   3  33       40.95       12.15     67.31 o 
   3   3  33        0.69        8.77     68.06 o 
   4   3  33        0.34       93.17     69.45 o 
   5   3  33       49.06       98.46     70.84 o 
   6   3  33      568.20      611.66     92.39 o 
   0   4  33     1286.70     1350.47    149.02 o 
   1   4  33       77.44      129.99     74.20 o 
   2   4  33       17.02       47.77     71.52 o 
   3   4  33       68.55      156.58     75.43 o 
   0   0  34       60.13      -85.83     92.03 o 
   1   0  34      159.96      276.95     75.88 o 
   2   0  34     2143.01     2603.46    133.39 o 
   3   0  34        0.21      -31.78     66.18 o 
   4   0  34      261.44      122.31     74.69 o 
   5   0  34      242.38      215.77     77.06 o 
   6   0  34      219.08      208.80     80.28 o 
   7   0  34       79.65      164.90     83.69 o 
   1   1  34      308.96      226.36     50.79 o 
   2   1  34      154.49      177.44     58.29 o 
   3   1  34      173.64      211.91     51.34 o 
   4   1  34      650.61      600.11     65.30 o 
   5   1  34      316.57      213.22     64.79 o 
   6   1  34       54.11      -33.97     60.49 o 
   0   2  34      564.34      795.39    128.39 o 
   1   2  34       90.25      120.58     73.43 o 
   2   2  34       24.53      100.03     70.16 o 
   3   2  34      153.02      109.79     73.41 o 
   4   2  34      704.64      773.72     93.12 o 
   5   2  34      272.07      219.03     81.40 o 
   6   2  34       12.99        6.56     76.98 o 
   1   3  34       48.23      -68.43     68.43 o 
   2   3  34     1185.30     1146.02    100.70 o 
   3   3  34       25.83       38.95     73.80 o 
   4   3  34      453.43      425.24     86.20 o 
   1   1  35      294.47      436.12     66.94 o 
   2   1  35     1078.66     1063.24     83.40 o 
   3   1  35      363.64      320.62     65.94 o 
   4   1  35      280.99      308.21     65.89 o 
   5   1  35      606.31      633.20     93.70 o 
   0   2  35       99.63       71.75     98.89 o 
   1   2  35       44.48       78.16     75.48 o 
   2   2  35      163.43      233.48     83.00 o 
   3   2  35        6.58       36.71     72.31 o 
   4   2  35      370.38      546.62     90.86 o 
   1   3  35      445.91      294.34     84.03 o 
   2   3  35       14.17       43.02     74.28 o 
   0   0  36      402.64      494.02    143.91 o 
   1   0  36        6.93      -30.88     73.23 o 
   2   0  36      278.54      239.48     81.45 o 
   3   0  36      373.37      307.12     84.03 o 
   4   0  36        2.40      -36.06     73.70 o 
   1   1  36        0.24      -17.61     57.70 o 
   2   1  36      226.92      331.06     68.33 o 
   3   1  36      133.77      188.14     63.36 o 
   4   1  36      353.02      448.24     82.09 o 
   0   2  36       32.56      -95.74     95.74 o 
   1   2  36      187.40      303.34     84.79 o 
   2   2  36      242.83      177.29     79.85 o 
   3   2  36        2.85       38.37     77.95 o 
   1   1  37     1051.53     1220.99     90.07 o 

                                                 
data_200K 

_shelx_title ' ab1007_200k in Pbca' 
_shelx_refln_list_code          4 
_shelx_F_calc_maximum      381.70 
_exptl_crystal_F_000      1680.00 
_reflns_d_resolution_high  0.8413 
 
loop_ 
 _symmetry_equiv_pos_as_xyz 
 'x, y, z' 
 '-x+1/2, -y, z+1/2' 
 '-x, y+1/2, -z+1/2' 
 'x+1/2, -y+1/2, -z' 
 '-x, -y, -z' 
 'x-1/2, y, -z-1/2' 
 'x, -y-1/2, z-1/2' 
 '-x-1/2, y-1/2, z' 
 
_cell_length_a    14.3893 
_cell_length_b     7.9176 
_cell_length_c    31.4850 
_cell_angle_alpha  90.000 
_cell_angle_beta   90.000 
_cell_angle_gamma  90.000 
 
_shelx_F_squared_multiplier     1.000 
 
loop_ 
 _refln_index_h 
 _refln_index_k 
 _refln_index_l 
 _refln_F_squared_calc 
 _refln_F_squared_meas 
 _refln_F_squared_sigma 
 _refln_observed_status 
   4   0   0     5983.12     5979.24    142.10 o 
   6   0   0        0.86      -48.76     48.76 o 
   8   0   0     3547.98     3619.81    160.33 o 
  10   0   0     2283.50     2164.79    186.19 o 
  12   0   0     1225.27     1165.88    165.50 o 
  14   0   0    22623.23    22923.11    747.70 o 
  16   0   0        4.21      -25.12    140.38 o 
   2   1   0      385.62      464.36     27.01 o 
   4   1   0     3291.12     3311.14     73.29 o 
   6   1   0    11290.95    11528.14    175.61 o 
   8   1   0     3450.87     3303.35    186.86 o 
  10   1   0     1576.76     1494.89     92.34 o 
  12   1   0     1501.94     1485.91    134.47 o 
  14   1   0       80.24      220.94    117.47 o 
  16   1   0      675.84      585.16    187.66 o 
   2   2   0   145697.86   145465.02   1654.03 o 
   4   2   0      357.74      359.74     38.81 o 
   6   2   0      608.55      645.26     44.00 o 
   8   2   0     2188.44     2282.36     93.27 o 
  10   2   0      194.39      157.32     56.82 o 
  12   2   0     4022.34     4084.82    188.00 o 
  14   2   0       12.20      -92.54     95.31 o 
  16   2   0     2025.63     2127.85    263.03 o 
   2   3   0     1663.71     1709.01     64.24 o 
   4   3   0     1011.97     1159.80     44.46 o 
   6   3   0     3979.16     3465.55    177.03 o 
   8   3   0      330.96      292.36    101.30 o 
  10   3   0        7.42      -49.41     49.41 o 
  12   3   0      583.71      697.55    100.05 o 
  14   3   0      130.38       42.85    140.38 o 
  16   3   0     2255.64     2243.10    283.71 o 
   2   4   0     4016.70     4074.04    110.83 o 
   4   4   0     6687.54     6818.64    157.04 o 
   6   4   0     5503.49     5699.06    124.34 o 
   8   4   0     2075.25     2173.06     92.49 o 
  10   4   0      316.10      363.51    116.74 o 
  12   4   0      847.15      495.02    146.29 o 
  14   4   0      746.24      666.43    178.80 o 
   2   5   0     1774.82     1707.66     58.56 o 
   4   5   0     1047.73     1116.99     67.32 o 
   6   5   0       46.27      -22.90    139.64 o 
   8   5   0     1097.51     1075.75     94.56 o 
  10   5   0      280.97      297.01    118.21 o 
  12   5   0      876.59      896.95    165.50 o 
  14   5   0     2089.77     2342.11    260.07 o 
   2   6   0     1194.45     1186.57     90.14 o 
   4   6   0     1005.31      975.49     98.27 o 
   6   6   0      675.62      701.91     72.34 o 
   8   6   0       89.52       84.23     93.09 o 
  10   6   0      332.08      385.67    127.08 o 
  12   6   0     1585.62     1587.02    205.40 o 
   2   7   0      271.87      332.48     59.11 o 
   4   7   0      226.58      293.23     46.85 o 
   6   7   0      138.94      124.12     90.14 o 
   8   7   0      761.11      882.17    138.90 o 
  10   7   0      625.97      855.57    158.11 o 
   4   8   0      428.88      455.12     87.18 o 
   6   8   0       71.28      118.21     94.57 o 
   8   8   0      183.11      344.30    127.08 o 
   4   9   0        0.19       25.12     73.88 o 
   2   1   1    12428.38    12042.81    155.19 o 
   3   1   1     4818.27     4805.77     66.92 o 
   4   1   1      593.55      601.60     26.05 o 
   5   1   1      312.89      286.26     25.45 o 
   6   1   1     1310.06     1267.12     39.89 o 
   7   1   1     8684.98     8506.25    105.49 o 
   8   1   1     1207.66     1200.19     53.21 o 
   9   1   1     3638.89     3544.11    116.32 o 
  10   1   1     1537.92     1696.15     67.52 o 
  11   1   1      501.97      556.56     62.37 o 
  12   1   1      637.59      668.48     71.55 o 
  13   1   1      810.09      911.04     82.09 o 
  14   1   1      506.81      482.92     75.33 o 
  15   1   1        6.27       24.24     66.33 o 
  16   1   1       28.60      135.88    132.99 o 
  17   1   1      112.73       -1.52    192.84 o 
   1   2   1    22933.26    23544.04    242.23 o 
   2   2   1    43413.36    44336.58    385.67 o 
   3   2   1    59032.88    59792.51    487.94 o 
   4   2   1     5251.62     5315.06     76.89 o 
   5   2   1     1238.35     1319.02     43.08 o 
   6   2   1        0.82       -8.98     21.60 o 
   7   2   1     2362.10     2384.23     63.93 o 
   8   2   1      334.17      442.39     52.62 o 
   9   2   1        4.61      -29.56     31.95 o 
  10   2   1      141.65      180.33     40.07 o 
  11   2   1     5189.67     5208.21    114.96 o 
  12   2   1     2819.51     2720.16    110.70 o 
  13   2   1     4870.04     4824.52    147.19 o 
  14   2   1        0.37       28.16     71.64 o 
  15   2   1      206.69      338.30    112.32 o 
  16   2   1      334.88      426.98    129.01 o 
   1   3   1     1598.52     1584.32     51.17 o 
   2   3   1      448.29      417.90     18.35 o 
   3   3   1     4459.28     4359.27     62.09 o 
   4   3   1     1599.59     1606.72     36.67 o 
   5   3   1       44.56       15.33     22.86 o 
   6   3   1       46.14       56.98     23.15 o 
   7   3   1      336.77      330.53     43.31 o 
   8   3   1     1561.56     1487.52     56.03 o 
   9   3   1      406.73      368.19     41.90 o 
  10   3   1       21.74        6.52     37.18 o 
  11   3   1       65.24       34.80     53.96 o 
  12   3   1     1841.90     1956.12     98.73 o 
  13   3   1        1.31      -46.99     85.70 o 
  14   3   1       90.58      193.91    101.87 o 
  15   3   1        9.26      -82.42    166.24 o 
  16   3   1      165.57       13.01    147.03 o 
   1   4   1    10898.21    10833.91    191.73 o 
   2   4   1     3443.75     3415.06     59.20 o 
   3   4   1       20.69       29.24     16.08 o 
   4   4   1     2474.57     2468.70     64.61 o 
   5   4   1       66.49       52.86     24.94 o 
   6   4   1      603.10      571.18     38.70 o 
   7   4   1     1172.86     1136.72     46.91 o 
   8   4   1      757.66      821.92     45.66 o 
   9   4   1     1653.34     1530.16     98.79 o 
  10   4   1      448.38      418.53     83.06 o 
  11   4   1      271.97      100.19    109.35 o 
  12   4   1      319.01      277.06     91.95 o 
  13   4   1     2783.25     2703.69    178.59 o 
  14   4   1      469.64      749.49    123.24 o 
  15   4   1       10.29      -95.86     95.86 o 
   1   5   1     1788.58     1706.19     59.85 o 
   2   5   1     5953.44     5750.13     84.11 o 
   3   5   1        0.89      -30.50     30.50 o 
   4   5   1      874.46      903.41     43.08 o 
   5   5   1     1009.56      961.49     49.58 o 
   6   5   1     1448.98     1407.72     77.64 o 
   7   5   1     2677.73     2779.11     88.75 o 
   8   5   1     2023.46     1834.76     81.56 o 
   9   5   1        0.45      -61.62     61.62 o 
  10   5   1     1837.41     1839.33    132.69 o 
  11   5   1       12.30       -5.65     75.70 o 
  12   5   1      169.45      133.75     89.84 o 
  13   5   1      740.01      852.12    132.25 o 
  14   5   1       79.94       73.64     99.75 o 
   1   6   1     3716.86     3615.86    122.65 o 
   2   6   1      523.17      589.48     65.02 o 
   3   6   1       13.62       -3.48     24.17 o 
   4   6   1      733.22      778.77     42.14 o 
   5   6   1     2639.69     2685.46    122.85 o 
   6   6   1      405.67      376.48     45.50 o 
   7   6   1       79.46      206.00     66.29 o 
   8   6   1      706.38      592.84     83.57 o 
   9   6   1      152.66      259.27    134.47 o 
  10   6   1     1875.87     1836.35    314.74 o 
  11   6   1      144.12      162.84     87.24 o 
  12   6   1        4.37       52.13     89.57 o 
  13   6   1      206.03      359.63    108.61 o 
   2   7   1      389.39      366.51     41.76 o 
   3   7   1       80.26      101.35     51.72 o 
   4   7   1      267.59      287.25     33.56 o 
   5   7   1      430.30      385.48     41.29 o 
   6   7   1      611.14      648.17    147.03 o 
   7   7   1       23.52      -45.07     63.74 o 
   8   7   1      932.44     1063.63    115.26 o 
   9   7   1      174.41      255.79     85.11 o 
  10   7   1     1258.10     1274.41    125.88 o 
  11   7   1      490.24      470.15    121.17 o 
   2   8   1      147.14      206.87     50.24 o 
   3   8   1     1495.50     1422.39    101.22 o 
   4   8   1      705.68      857.95     86.44 o 
   5   8   1       62.65       65.78     60.49 o 
   6   8   1      409.31      357.47     74.66 o 
   7   8   1       71.95       73.88     73.14 o 
   8   8   1       32.45       52.99     79.89 o 
   4   9   1       19.90      100.69     52.21 o 
   3   0   2     4982.17     4835.39    104.00 o 
   4   0   2     1678.40     1532.25     54.09 o 
   5   0   2     2694.03     2755.26     75.71 o 
   6   0   2     7005.72     7054.94    127.25 o 
   7   0   2      287.82      243.49     41.55 o 
   8   0   2     2904.02     2735.95     87.71 o 
   9   0   2     4581.15     5026.30    171.88 o 
  10   0   2     2052.13     2064.55    129.51 o 
  11   0   2    11622.75    11660.09    305.61 o 
  12   0   2      295.27      313.37     85.97 o 
  13   0   2     1304.56     1476.38    148.51 o 
  14   0   2      718.59      654.23    122.04 o 
  15   0   2     4333.04     4637.61    224.58 o 
  16   0   2     1995.13     1930.56    174.48 o 
  17   0   2      465.49      448.41    137.40 o 
   2   1   2      641.15      587.75     30.12 o 
   3   1   2    40299.62    41056.19    364.86 o 
   4   1   2      105.72      119.61     20.68 o 
   5   1   2    10513.62    10480.96    112.02 o 
   6   1   2     3898.92     3982.03     65.66 o 
   7   1   2     3003.13     3101.59     63.15 o 
   8   1   2      150.77      112.17     31.59 o 
   9   1   2     4425.87     4496.42     94.73 o 
  10   1   2       18.42       42.61     37.10 o 
  11   1   2     3305.26     3479.37    152.50 o 
  12   1   2     8223.00     7942.63    179.84 o 
  13   1   2      623.31      653.46     81.26 o 
  14   1   2      248.73       86.10     64.36 o 
  15   1   2      880.15      789.62     88.85 o 
  16   1   2      190.10      276.75    191.36 o 
   0   2   2    31086.87    30938.60    507.58 o 
   1   2   2     7940.27     7897.14     88.88 o 
   2   2   2       79.84       65.21     14.92 o 
   3   2   2     4006.99     3934.43     51.25 o 
   4   2   2    17994.54    17699.57    188.40 o 
   5   2   2     1348.85     1364.95     39.99 o 
   6   2   2      207.40      273.03     30.83 o 
   7   2   2     3662.15     3718.04     77.04 o 
   8   2   2      402.34      403.45     38.53 o 
   9   2   2     2063.63     2128.85     90.53 o 
  10   2   2     1113.14     1224.48     61.24 o 
  11   2   2      463.47      385.60     48.68 o 
  12   2   2        0.72      -49.92     49.92 o 
  13   2   2     1887.94     2075.53    111.55 o 
  14   2   2        0.84      -16.59     71.39 o 
  15   2   2     1585.39     1469.16    156.72 o 
  16   2   2       10.37     -107.87    107.87 o 
   1   3   2     1144.40     1190.87     34.97 o 
   2   3   2     3707.87     3774.22     54.41 o 
   3   3   2     1654.16     1530.29     34.34 o 
   4   3   2     7776.28     7844.46     90.87 o 
   5   3   2      825.51      862.86     35.42 o 
   6   3   2     2451.19     2283.41     75.98 o 
   7   3   2     4156.94     4106.22    100.07 o 
   8   3   2      472.31      440.39     38.92 o 
   9   3   2      205.63      155.55     36.63 o 
  10   3   2    12925.42    12778.08    179.76 o 
  11   3   2      445.92      446.68     59.16 o 
  12   3   2       45.22       97.11     53.72 o 
  13   3   2       76.87      123.80     90.83 o 
  14   3   2       36.98       41.89    133.73 o 
  15   3   2      105.85        4.62     98.15 o 
  16   3   2       93.21      -66.35    108.53 o 
   0   4   2     5803.14     5771.78    155.16 o 
   1   4   2     4156.23     4474.89    136.68 o 
   2   4   2     4567.95     4460.99     71.03 o 
   3   4   2     1794.96     1667.10     37.30 o 
   4   4   2     2788.03     2696.01     66.29 o 
   5   4   2     4825.60     4798.33     82.41 o 
   6   4   2       96.00      139.77     30.05 o 
   7   4   2      292.73      258.14     32.30 o 
   8   4   2       14.01       14.76     30.31 o 
   9   4   2        2.51       28.76     27.48 o 
  10   4   2     1536.39     1409.21    211.31 o 
  11   4   2      513.34      620.23     99.20 o 
  12   4   2      965.32      842.22    114.92 o 
  13   4   2      137.82      134.47     92.55 o 
  14   4   2       50.16      -64.52    147.77 o 
  15   4   2       49.26       65.56    105.59 o 
   1   5   2     1659.82     1613.52     56.39 o 
   2   5   2     1057.78     1108.22     37.42 o 
   3   5   2     1103.20     1081.23     41.30 o 
   4   5   2      126.30      104.22     29.78 o 
   5   5   2     2249.62     2218.12     69.74 o 
   6   5   2       17.15        5.07     40.49 o 
   7   5   2     1335.77     1403.39     69.26 o 
   8   5   2      962.90      942.09     65.51 o 
   9   5   2      211.01      243.94     74.57 o 
  10   5   2      177.38      142.74     78.88 o 
  11   5   2      278.22      214.54    110.09 o 
  12   5   2      227.08      199.99     92.43 o 
  13   5   2      555.48      647.13    119.06 o 
  14   5   2       11.70       39.36     98.07 o 
   1   6   2     1397.29     1461.42     84.23 o 
   2   6   2       24.02        6.91     24.52 o 
   3   6   2       13.48       33.21     27.51 o 
   4   6   2      210.86      225.15     33.67 o 
   5   6   2      110.49      115.82     36.51 o 
   6   6   2      745.19      692.20     52.56 o 
   7   6   2      203.18      191.79    137.42 o 
   8   6   2        5.80      -26.60     62.69 o 
   9   6   2      400.23      344.32    102.70 o 
  10   6   2        2.87      -35.40     73.39 o 
  11   6   2        2.94       71.55     99.00 o 
  12   6   2      247.37      131.51     92.99 o 
  13   6   2      338.88      405.39    111.79 o 
   2   7   2      298.38      266.54     41.18 o 
   3   7   2     1081.81     1171.10     53.31 o 
   4   7   2     1782.00     1799.09     59.36 o 
   5   7   2     1060.61     1173.47     55.82 o 
   6   7   2       54.42       74.74     70.93 o 
   7   7   2      270.96      169.45     70.96 o 
   8   7   2      762.56      741.09     95.07 o 
   9   7   2      179.05      149.24     82.54 o 
  10   7   2      221.93      352.78     95.57 o 
  11   7   2      360.00      284.59    104.47 o 
   2   8   2      239.33      298.49     59.11 o 
   3   8   2      231.85      209.58     48.76 o 
   4   8   2      201.66      296.30     59.31 o 
   5   8   2        4.46      -57.35     57.35 o 
   6   8   2        5.88      -28.41     63.21 o 
   7   8   2      120.78      200.19     78.32 o 
   8   8   2       26.77      -29.25     99.00 o 
   3   9   2       10.96      110.83     62.06 o 
   4   9   2       85.44      -38.42     75.36 o 
   1   1   3      893.99      960.60     78.46 o 
   2   1   3     7286.37     7295.24     83.55 o 
   3   1   3    53503.52    53287.46    438.52 o 
   4   1   3     1304.01     1396.14     37.03 o 
   5   1   3     6466.95     6269.60     87.96 o 
   6   1   3     2785.42     2952.62     57.36 o 
   7   1   3      292.00      275.29     29.21 o 
   8   1   3     3072.19     3212.14     76.54 o 
   9   1   3      496.50      509.21     48.68 o 
  10   1   3      564.45      638.94     69.81 o 
  11   1   3     3040.00     3096.60    114.06 o 
  12   1   3      357.62      377.86     61.62 o 
  13   1   3     1209.29     1398.36     94.47 o 
  14   1   3      189.00      230.17     74.65 o 
  15   1   3       53.13      -18.62     66.65 o 
  16   1   3      415.53      244.08    118.42 o 
   0   2   3   105950.15   103881.73   2356.88 o 
   1   2   3      333.60      317.31     20.21 o 
   2   2   3      339.84      352.75     18.78 o 
   3   2   3    17019.70    16811.01    162.10 o 
   4   2   3      789.45      809.97     38.11 o 
   5   2   3     2092.56     2103.66     51.76 o 
   6   2   3     1478.98     1507.19     49.38 o 
   7   2   3        2.43        1.22     27.77 o 
   8   2   3      922.57      991.19     48.95 o 
   9   2   3      606.25      626.88     45.32 o 
  10   2   3      633.79      667.63     50.32 o 
  11   2   3       45.22       48.09     40.39 o 
  12   2   3      668.74      728.27     73.45 o 
  13   2   3      642.05      503.87     70.76 o 
  14   2   3     1828.76     1882.46    164.93 o 
  15   2   3       13.65       37.02    166.98 o 
  16   2   3      137.08       -3.76    138.90 o 
   1   3   3      959.08      919.60     36.91 o 
   2   3   3      542.14      587.90     23.91 o 
   3   3   3     2293.15     2039.43     39.39 o 
   4   3   3       74.18      107.44     20.42 o 
   5   3   3     8023.80     7578.21    112.08 o 
   6   3   3     9740.81     9012.35    363.95 o 
   7   3   3      721.86      780.68     54.41 o 
   8   3   3     2127.23     2077.87     63.76 o 
   9   3   3     3475.87     3428.99     85.23 o 
  10   3   3      245.71      158.91     40.61 o 
  11   3   3      605.72      613.98     63.92 o 
  12   3   3      438.07      415.70     70.38 o 
  13   3   3       22.89      -50.95     89.40 o 
  14   3   3      143.46      159.78    135.21 o 
  15   3   3       35.09      109.54    103.05 o 
  16   3   3       28.61      -12.32    111.25 o 
   0   4   3     3661.16     3744.42    119.69 o 
   1   4   3     1937.95     1886.84     84.67 o 
   2   4   3    15330.40    15458.86    193.65 o 
   3   4   3     9732.83     9508.21    107.23 o 
   4   4   3       43.30       14.61     27.08 o 
   5   4   3       57.96       88.48     25.93 o 
   6   4   3       86.63       96.47     29.00 o 
   7   4   3        7.08      -17.00     30.11 o 
   8   4   3       69.36       76.74     31.84 o 
   9   4   3      949.93      884.39     55.39 o 
  10   4   3        1.44       35.43     45.86 o 
  11   4   3      737.85      791.52    197.27 o 
  12   4   3     1994.11     2096.47    157.23 o 
  13   4   3      383.52      441.52    104.24 o 
  14   4   3      513.91      278.16    107.07 o 
  15   4   3      641.06      909.19    140.39 o 
   1   5   3      394.32      383.94     41.37 o 
   2   5   3        9.15       -1.60     19.65 o 
   3   5   3     1496.92     1566.10     49.84 o 
   4   5   3      521.51      557.12     38.37 o 
   5   5   3      270.20      295.99     38.23 o 
   6   5   3     1125.37     1098.32     70.60 o 
   7   5   3     3902.00     3842.55    101.31 o 
   8   5   3      125.53      112.62     46.76 o 
   9   5   3     1200.48     1194.43    107.48 o 
  10   5   3       55.16        5.91     72.10 o 
  11   5   3      172.81       99.89     81.98 o 
  12   5   3        7.69       46.74     82.23 o 
  13   5   3       92.62       17.63     91.66 o 
  14   5   3        0.05     -100.10    203.92 o 
   0   6   3      356.08      353.16     45.81 o 
   1   6   3      911.51      901.38     68.71 o 
   2   6   3     1887.68     1828.75     70.15 o 
   3   6   3      331.80      339.86     30.24 o 
   4   6   3     1303.64     1306.18     51.57 o 
   5   6   3      629.61      535.68     68.04 o 
   6   6   3      256.62      179.41     41.38 o 
   7   6   3      149.11      216.21     66.29 o 
   8   6   3      496.68      437.43     80.97 o 
   9   6   3       43.79      -66.65     66.65 o 
  10   6   3       40.18       -0.04     72.07 o 
  11   6   3     1010.50     1064.60    119.55 o 
  12   6   3       13.61      113.03     94.81 o 
  13   6   3      325.19      208.74    107.38 o 
   1   7   3        1.03       11.82     44.33 o 
   2   7   3      206.92      174.37     60.58 o 
   3   7   3      240.47      304.86     37.10 o 
   4   7   3      545.72      600.07     39.87 o 
   5   7   3      585.26      628.91     54.13 o 
   6   7   3       43.01      -27.34     58.51 o 
   7   7   3       75.82       84.23     70.01 o 
   8   7   3        1.02      -30.74     69.48 o 
   9   7   3       21.92      202.67     81.42 o 
  10   7   3      259.60      345.73    122.65 o 
  11   7   3      100.38      160.67     92.43 o 
   2   8   3      146.84      205.40     60.58 o 
   3   8   3       28.27       16.25     66.50 o 
   4   8   3       73.36       65.46     53.80 o 
   5   8   3        0.72      -25.12     58.51 o 
   6   8   3      161.82      226.53     70.52 o 
   7   8   3       77.83      -29.55     70.01 o 
   8   8   3        0.30       19.60     76.19 o 
   3   9   3      203.92      196.53     70.93 o 
   4   9   3        9.79       44.33     79.79 o 
   2   0   4     6883.78     6765.70     99.00 o 
   3   0   4    23881.83    24013.76    296.27 o 
   4   0   4    56742.34    56536.19    665.88 o 
   5   0   4     7694.13     7799.00    130.92 o 
   6   0   4     8959.40     9403.06    154.21 o 
   7   0   4      429.87      421.39     45.00 o 
   8   0   4     1141.10     1161.75     63.53 o 
   9   0   4      199.26      171.14     66.05 o 
  10   0   4      326.50      335.56     79.39 o 
  11   0   4      587.47      562.79     90.62 o 
  12   0   4     2313.37     2261.71    148.89 o 
  13   0   4      741.84      605.67    148.51 o 
  14   0   4     3000.41     2789.93    185.98 o 
  15   0   4      162.46      139.39    101.29 o 
  16   0   4      179.12      221.65    119.12 o 
  17   0   4     2926.18     2952.39    310.31 o 
   1   1   4      114.54      105.90     17.88 o 
   2   1   4       94.04       57.48     15.95 o 
   3   1   4    19424.17    19560.80    174.29 o 
   4   1   4    16419.79    16407.00    154.64 o 
   5   1   4      579.19      540.22     29.85 o 
   6   1   4      769.61      778.42     34.56 o 
   7   1   4      745.24      704.96     36.36 o 
   8   1   4      158.06       89.27     32.95 o 
   9   1   4      839.90      851.97     51.97 o 
  10   1   4     6765.57     6687.06    195.75 o 
  11   1   4       40.89       19.75     48.86 o 
  12   1   4     1516.64     1572.15     91.76 o 
  13   1   4      695.58      703.96     78.27 o 
  14   1   4        6.92      -30.51     59.02 o 
  15   1   4        4.87       -7.52     66.60 o 
  16   1   4       14.45      180.29    126.34 o 
   0   2   4     2723.37     2868.22     55.05 o 
   1   2   4    20879.52    21336.53    207.09 o 
   2   2   4    14300.44    14140.94    146.55 o 
   3   2   4      879.22      863.97     28.94 o 
   4   2   4     2166.16     2113.48     51.96 o 
   5   2   4      517.31      459.96     26.85 o 
   6   2   4      259.92      245.24     29.35 o 
   7   2   4      114.61      140.19     30.55 o 
   8   2   4      487.82      610.93     43.48 o 
   9   2   4      556.41      647.66     47.07 o 
  10   2   4      294.98      328.11     47.79 o 
  11   2   4       74.61       30.77     40.81 o 
  12   2   4     1697.17     1767.15     95.96 o 
  13   2   4      453.32      430.94     91.71 o 
  14   2   4       18.51      -51.84     65.71 o 
  15   2   4     1410.06     1463.25    158.17 o 
  16   2   4        0.07      -33.82    106.00 o 
   1   3   4     6699.44     6522.82    105.96 o 
   2   3   4     2835.33     2869.74     43.57 o 
   3   3   4     1006.99     1006.96     29.45 o 
   4   3   4     6024.94     6362.40     79.89 o 
   5   3   4    14631.79    15132.23    188.35 o 
   6   3   4     9985.00    10039.33    162.67 o 
   7   3   4     1677.79     1494.78    112.34 o 
   8   3   4     3795.66     3829.07     83.35 o 
   9   3   4     2088.71     2112.86     71.12 o 
  10   3   4     2686.52     2679.24     91.71 o 
  11   3   4      797.47      809.24     69.89 o 
  12   3   4      420.53      483.63     76.41 o 
  13   3   4       11.41      -79.22     79.22 o 
  14   3   4       80.29      220.13    105.96 o 
  15   3   4      136.73      196.23    137.42 o 
  16   3   4      192.09      190.89    121.32 o 
   0   4   4     1896.58     1929.84     90.14 o 
   1   4   4    12159.76    12775.39    185.58 o 
   2   4   4      129.01      214.18     33.76 o 
   3   4   4      467.02      499.55     24.61 o 
   4   4   4        6.10       18.88     21.23 o 
   5   4   4      209.28      206.63     28.46 o 
   6   4   4       91.81       96.44     30.04 o 
   7   4   4      163.28      146.10     34.31 o 
   8   4   4      158.48      133.35     36.93 o 
   9   4   4       20.70       10.57     25.76 o 
  10   4   4      128.44       58.28    146.29 o 
  11   4   4      743.26      823.63    106.02 o 
  12   4   4      530.81      438.82     99.78 o 
  13   4   4      674.97      658.19    199.49 o 
  14   4   4       54.31       43.84    103.44 o 
  15   4   4       19.02        5.74    106.05 o 
   1   5   4     1366.11     1257.76     52.54 o 
   2   5   4        3.35       20.18     21.10 o 
   3   5   4      747.77      833.97     38.97 o 
   4   5   4      460.76      463.27     37.33 o 
   5   5   4      791.64      789.89     46.76 o 
   6   5   4        9.53      -34.99     34.99 o 
   7   5   4    10221.92     9671.84    146.86 o 
   8   5   4      398.48      468.74     62.56 o 
   9   5   4      718.90      703.68     92.99 o 
  10   5   4      637.62      571.17     95.07 o 
  11   5   4       29.43        4.96    122.65 o 
  12   5   4      176.89      119.47     90.89 o 
  13   5   4      632.63      508.52    113.88 o 
  14   5   4      123.05       60.90    104.35 o 
   0   6   4      191.90      288.15     50.24 o 
   1   6   4       50.06       64.70     31.75 o 
   2   6   4        3.18      -20.93     20.93 o 
   3   6   4      108.45      121.75     28.00 o 
   4   6   4      342.63      350.11     36.53 o 
   5   6   4      703.13      715.02     47.78 o 
   6   6   4       55.08      -12.29     49.19 o 
   7   6   4       44.03        5.83     58.40 o 
   8   6   4       13.43       29.17     66.05 o 
   9   6   4      783.41      694.03     98.27 o 
  10   6   4       55.09       69.18     75.75 o 
  11   6   4      113.15       94.57     83.59 o 
  12   6   4        0.05      -83.06     83.06 o 
  13   6   4      125.43      162.54    106.58 o 
   1   7   4      101.35       84.81     31.55 o 
   2   7   4     1522.90     1611.95     98.52 o 
   3   7   4     1671.89     1839.33     67.13 o 
   4   7   4       10.32       12.12     30.53 o 
   5   7   4      377.01      348.71     66.34 o 
   6   7   4      576.70      617.25     79.41 o 
   7   7   4     1631.09     1812.92    145.55 o 
   8   7   4        3.46      -57.71     66.20 o 
   9   7   4      197.36      267.01    192.84 o 
  10   7   4      172.35      328.26     91.39 o 
  11   7   4      736.88      801.37    117.85 o 
   2   8   4      105.02      161.07     62.06 o 
   3   8   4      447.42      480.24     87.18 o 
   4   8   4        4.88      -52.12     52.12 o 
   5   8   4      280.33      272.81     64.68 o 
   6   8   4        1.27     -109.25    175.84 o 
   7   8   4        3.85      -68.71     68.71 o 
   8   8   4       24.23      135.49     81.42 o 
   3   9   4       89.87       59.11     73.88 o 
   4   9   4      145.59      128.56     79.79 o 
   1   1   5    12869.12    12913.22    176.60 o 
   2   1   5     4817.72     4800.56     72.55 o 
   3   1   5       97.55      111.40     20.68 o 
   4   1   5       56.54       42.18     20.73 o 
   5   1   5      104.64       64.90     22.65 o 
   6   1   5      178.40      219.52     26.36 o 
   7   1   5    27778.47    29057.45    270.09 o 
   8   1   5     3104.47     3009.83     77.45 o 
   9   1   5     1575.80     1550.39     63.99 o 
  10   1   5     4349.95     4377.57    122.93 o 
  11   1   5       59.59      -26.92     46.47 o 
  12   1   5     6886.44     6853.68    179.58 o 
  13   1   5       18.14       24.92     55.76 o 
  14   1   5      486.37      443.93     88.30 o 
  15   1   5       80.50      125.42     68.80 o 
  16   1   5        2.29       92.09    117.54 o 
   0   2   5      123.14      153.20     31.23 o 
   1   2   5    18270.57    17978.51    219.03 o 
   2   2   5     3566.75     3476.62     54.38 o 
   3   2   5     3252.09     3290.28     60.50 o 
   4   2   5     1462.30     1439.39     46.15 o 
   5   2   5      434.13      433.06     26.92 o 
   6   2   5     1599.13     1470.73     50.10 o 
   7   2   5      185.00      186.10     31.70 o 
   8   2   5     2668.90     2563.99     71.67 o 
   9   2   5        0.20      -32.37     32.37 o 
  10   2   5     1892.59     1922.31     72.55 o 
  11   2   5     5689.56     5460.79    128.08 o 
  12   2   5      441.87      352.38     62.04 o 
  13   2   5      886.68      922.95     80.81 o 
  14   2   5      207.01      182.49     99.26 o 
  15   2   5        0.06      -70.57     92.47 o 
  16   2   5       49.97      152.26    120.41 o 
   1   3   5     2177.33     2112.86     43.85 o 
   2   3   5     3455.57     3423.03     51.06 o 
   3   3   5       41.38       59.19     17.91 o 
   4   3   5      257.58      236.94     23.21 o 
   5   3   5     4092.57     4419.09     82.24 o 
   6   3   5     4614.07     4393.84    100.07 o 
   7   3   5     3489.19     3470.59     98.02 o 
   8   3   5      134.44      112.08     32.65 o 
   9   3   5     2063.60     2179.21     85.08 o 
  10   3   5     1450.52     1534.79     67.20 o 
  11   3   5       50.43       24.66     49.19 o 
  12   3   5      119.55       31.59     61.94 o 
  13   3   5       28.09      -46.80     87.24 o 
  14   3   5      463.74      422.35    135.95 o 
  15   3   5        1.14       95.29    100.34 o 
  16   3   5      782.26      809.03    142.62 o 
   0   4   5       15.13        7.39     42.85 o 
   1   4   5     1797.41     1800.54     64.80 o 
   2   4   5     3131.65     3249.94     75.04 o 
   3   4   5     1416.15     1336.00     41.99 o 
   4   4   5     5844.24     5580.91     85.99 o 
   5   4   5     2831.24     2720.30    104.78 o 
   6   4   5      342.46      286.30     34.15 o 
   7   4   5      505.35      513.66     42.56 o 
   8   4   5       23.89       18.33     34.81 o 
   9   4   5     1529.92     1510.01    137.44 o 
  10   4   5     2737.65     2284.05    144.64 o 
  11   4   5      344.37      513.54    121.91 o 
  12   4   5      507.77      482.46    102.92 o 
  13   4   5      312.44      245.87    108.61 o 
  14   4   5      192.72      151.51     98.64 o 
  15   4   5      417.31      498.53    124.86 o 
   1   5   5      151.45      162.12     32.51 o 
   2   5   5       42.79       43.20     26.51 o 
   3   5   5      952.75      945.90     41.88 o 
   4   5   5     2774.51     2842.57     72.98 o 
   5   5   5      131.27      172.61     36.28 o 
   6   5   5      955.29     1125.67     47.13 o 
   7   5   5       52.15       36.10     49.12 o 
   8   5   5      264.60      210.68     96.79 o 
   9   5   5     1242.65     1213.77    108.67 o 
  10   5   5     1388.89     1363.57    120.11 o 
  11   5   5      493.12      396.39    121.17 o 
  12   5   5        3.82       27.53    176.58 o 
  13   5   5       75.42       44.21     92.71 o 
  14   5   5       39.29       15.64    115.26 o 
   0   6   5     1618.66     1765.82     96.05 o 
   1   6   5      290.65      359.74     41.64 o 
   2   6   5     1340.72     1378.43     53.59 o 
   3   6   5       11.73       29.29     27.20 o 
   4   6   5      550.43      550.65     41.27 o 
   5   6   5       47.05      112.12     43.72 o 
   6   6   5      313.77      313.53     44.68 o 
   7   6   5      354.11      257.06    126.34 o 
   8   6   5      194.10      113.80     72.57 o 
   9   6   5       27.53       55.67     72.01 o 
  10   6   5      143.10       58.27    152.20 o 
  11   6   5        3.91      129.26     85.15 o 
  12   6   5      113.26       66.73     93.30 o 
   1   7   5       49.98       65.11     34.90 o 
   2   7   5      933.15      960.53     46.00 o 
   3   7   5        0.69       -7.77     29.42 o 
   4   7   5      280.86      334.44     37.63 o 
   5   7   5        1.71       34.85     56.39 o 
   6   7   5      756.39      559.35     79.80 o 
   7   7   5      170.77      176.65     73.66 o 
   8   7   5      285.28      313.13     81.98 o 
   9   7   5       16.32       94.45     78.18 o 
  10   7   5       67.74       53.30     87.20 o 
  11   7   5      503.89      351.88    101.77 o 
   1   8   5        0.84      -50.24     53.20 o 
   2   8   5       64.14       67.97     65.02 o 
   3   8   5        1.04       -2.07     39.91 o 
   4   8   5      173.41      143.33     82.75 o 
   5   8   5        2.82       17.95     57.98 o 
   6   8   5       15.28       31.72     66.85 o 
   7   8   5      104.41       16.57     69.91 o 
   8   8   5        0.07      -18.99     76.84 o 
   3   9   5       38.28      106.39     73.88 o 
   4   9   5      241.95      305.88     93.09 o 
   0   0   6    12389.66    11824.32    307.36 o 
   1   0   6    11174.58    10745.75    203.75 o 
   2   0   6    18808.62    18482.42    298.77 o 
   3   0   6    12881.59    12905.24    176.76 o 
   4   0   6     3250.89     3367.25     80.03 o 
   5   0   6      356.65      292.15     39.46 o 
   6   0   6    21174.75    21926.54    342.96 o 
   7   0   6      181.95      123.43     38.43 o 
   8   0   6     7683.85     7606.61    149.22 o 
   9   0   6      767.20      808.18     89.30 o 
  10   0   6     1327.63     1268.97    128.56 o 
  11   0   6     1510.27     1399.61    118.99 o 
  12   0   6     2563.95     2330.39    152.45 o 
  13   0   6      559.28      499.49     98.40 o 
  14   0   6       63.43      191.22    130.04 o 
  15   0   6      106.87      194.25    103.93 o 
  16   0   6       79.70      179.25    127.82 o 
   1   1   6     7484.39     7311.75    123.41 o 
   2   1   6    11716.51    11816.77    142.46 o 
   3   1   6     2098.16     2088.05     46.55 o 
   4   1   6     1004.80     1072.37     33.88 o 
   5   1   6     2368.55     2485.67     80.70 o 
   6   1   6     3925.03     4535.52     71.53 o 
   7   1   6      122.89       63.41     28.58 o 
   8   1   6     2342.97     2206.61     68.65 o 
   9   1   6     2405.52     2545.97     75.86 o 
  10   1   6       65.86       -0.28     45.25 o 
  11   1   6       29.20       80.91     50.76 o 
  12   1   6      430.17      295.52     63.25 o 
  13   1   6      218.25      323.49     75.32 o 
  14   1   6        2.30       65.03     61.33 o 
  15   1   6      568.58      558.90     81.34 o 
  16   1   6      199.08      120.43    114.94 o 
   0   2   6    55963.13    55140.64    898.56 o 
   1   2   6      158.23      158.17     21.73 o 
   2   2   6     4635.40     4675.82     66.66 o 
   3   2   6     2445.35     2484.41     52.29 o 
   4   2   6     3978.14     4096.94     70.85 o 
   5   2   6      118.41      170.52     24.26 o 
   6   2   6        1.39       26.30     25.71 o 
   7   2   6        0.01       14.49     28.53 o 
   8   2   6     3589.86     3679.78     82.25 o 
   9   2   6      165.33      144.07     37.04 o 
  10   2   6     4283.90     4623.39    104.04 o 
  11   2   6       62.85      100.21     44.79 o 
  12   2   6     1636.87     1753.38     96.99 o 
  13   2   6      625.36      702.61     76.95 o 
  14   2   6      920.04      869.78    129.11 o 
  15   2   6      393.57      422.88    114.81 o 
  16   2   6       62.15      141.33    110.52 o 
   1   3   6      239.91      217.18     16.54 o 
   2   3   6     2245.00     2162.71     49.69 o 
   3   3   6     1710.69     1750.47     41.13 o 
   4   3   6       45.79       31.11     24.71 o 
   5   3   6      773.21      773.10     40.63 o 
   6   3   6     5638.16     5389.76    111.73 o 
   7   3   6     1312.01     1295.25     64.90 o 
   8   3   6     1321.80     1298.94     54.88 o 
   9   3   6     1941.51     1859.03     84.26 o 
  10   3   6     1966.46     1917.84     74.24 o 
  11   3   6      338.01      254.55     56.74 o 
  12   3   6        4.08      -59.06     72.48 o 
  13   3   6     1787.11     1808.65    150.85 o 
  14   3   6     2445.98     2192.27    172.81 o 
  15   3   6      205.41      249.73    111.25 o 
   0   4   6      389.54      410.79     59.11 o 
   1   4   6     1550.83     1633.84     94.57 o 
   2   4   6     4179.36     4140.19     61.94 o 
   3   4   6     1808.67     1828.22     43.77 o 
   4   4   6     2240.88     2363.91     78.21 o 
   5   4   6       58.99       28.32     27.26 o 
   6   4   6     1676.00     1594.26     57.60 o 
   7   4   6      173.12      163.24     36.04 o 
   8   4   6       78.44      107.18     38.69 o 
   9   4   6      648.23      518.43     70.41 o 
  10   4   6      379.48      389.77     85.66 o 
  11   4   6      166.04       58.19     80.37 o 
  12   4   6      559.73      512.10    102.60 o 
  13   4   6      450.51      330.25    178.80 o 
  14   4   6       31.18       14.10     96.31 o 
  15   4   6        2.76      -46.96    110.09 o 
   1   5   6       36.23       29.55     50.24 o 
   2   5   6      173.62      233.95     39.41 o 
   3   5   6       24.85       39.86     27.16 o 
   4   5   6      190.17      193.46     34.18 o 
   5   5   6      532.89      534.38     45.18 o 
   6   5   6     3003.22     3026.74     72.95 o 
   7   5   6      321.73      340.94     39.88 o 
   8   5   6     1133.37      914.68     95.08 o 
   9   5   6      276.11      124.16     71.57 o 
  10   5   6       96.55      146.27     77.30 o 
  11   5   6      389.09      361.97     95.01 o 
  12   5   6     2268.78     2315.58    172.15 o 
  13   5   6      335.60      283.56    154.42 o 
  14   5   6       58.56       -0.70    103.43 o 
   0   6   6     3197.72     3101.63    132.99 o 
   1   6   6     2188.66     2322.71     83.99 o 
   2   6   6      577.69      649.88     52.46 o 
   3   6   6      453.06      459.31     42.73 o 
   4   6   6      921.48      902.15     49.26 o 
   5   6   6       22.01       -7.46     35.20 o 
   6   6   6     1527.04     1512.52     79.94 o 
   7   6   6        0.99       25.86     61.65 o 
   8   6   6      623.66      615.62     88.25 o 
   9   6   6       10.14      -35.89     72.41 o 
  10   6   6       15.33      -38.20     76.98 o 
  11   6   6       50.74       96.44     82.23 o 
  12   6   6      524.40      421.87    107.62 o 
   1   7   6       18.24       47.96     71.67 o 
   2   7   6      394.11      361.66     49.37 o 
   3   7   6       71.89      110.31     34.28 o 
   4   7   6      989.83     1083.64     66.75 o 
   5   7   6      871.19      839.24     80.85 o 
   6   7   6      246.52      202.61     67.82 o 
   7   7   6      844.59     1006.03    100.79 o 
   8   7   6      807.52      923.19    101.77 o 
   9   7   6     1019.85     1093.58    115.43 o 
  10   7   6      505.15      436.53    100.95 o 
  11   7   6      127.20      146.46     96.14 o 
   0   8   6       46.02      162.54     54.67 o 
   1   8   6       19.19       -1.21     56.15 o 
   2   8   6     1339.41     1385.92    151.46 o 
   3   8   6       17.57       15.29     50.98 o 
   4   8   6      271.12      202.44     85.70 o 
   5   8   6       44.38       30.33     61.62 o 
   6   8   6       35.99       -1.12     66.34 o 
   7   8   6       83.42      111.23    158.11 o 
   8   8   6      798.48      794.56    148.51 o 
   2   9   6        2.82      -65.02     65.02 o 
   3   9   6      230.81      239.38     84.23 o 
   1   1   7    21487.26    20887.25    258.77 o 
   2   1   7     2887.58     2743.26     58.22 o 
   3   1   7     3507.76     3633.39     59.48 o 
   4   1   7    24338.75    24472.24    237.35 o 
   5   1   7       29.73      -19.08     22.39 o 
   6   1   7     1795.70     1838.47     49.14 o 
   7   1   7     1524.74     1350.05     57.30 o 
   8   1   7     2738.88     2745.82     75.62 o 
   9   1   7     1610.66     1491.13     62.34 o 
  10   1   7      293.10      238.66     51.53 o 
  11   1   7      623.19      575.38     66.28 o 
  12   1   7      281.93      254.77     63.52 o 
  13   1   7        2.86      -35.05     62.92 o 
  14   1   7      920.10     1012.27     90.96 o 
  15   1   7      174.55      109.11     87.45 o 
  16   1   7      686.29      938.44    151.46 o 
   0   2   7    14372.98    14209.02    259.57 o 
   1   2   7        9.80       25.77     22.25 o 
   2   2   7     4229.00     3792.59    170.70 o 
   3   2   7     8335.63     8362.70    105.94 o 
   4   2   7     7192.08     7518.15    102.84 o 
   5   2   7     4185.74     4186.48     70.54 o 
   6   2   7      133.20      125.53     29.25 o 
   7   2   7      506.68      491.69     38.36 o 
   8   2   7      500.84      586.26     43.31 o 
   9   2   7      844.20      895.35     53.64 o 
  10   2   7      496.12      518.72     49.88 o 
  11   2   7       12.21       74.77     50.80 o 
  12   2   7        4.90       26.17     50.68 o 
  13   2   7      235.46      269.96     67.18 o 
  14   2   7      214.65      338.05    109.16 o 
  15   2   7       54.09      -51.45     99.75 o 
  16   2   7      431.33      372.57    125.33 o 
   1   3   7      759.10      734.20     27.78 o 
   2   3   7      388.17      387.75     25.98 o 
   3   3   7       19.55        9.82     39.40 o 
   4   3   7     5662.22     5723.30     93.18 o 
   5   3   7     7527.52     7559.97    116.30 o 
   6   3   7     3139.60     3125.69    142.26 o 
   7   3   7     2637.93     2712.38    109.63 o 
   8   3   7      706.62      689.51     50.65 o 
   9   3   7     2407.05     2499.77     78.31 o 
  10   3   7     2910.90     2892.04     86.61 o 
  11   3   7       61.81       34.20     48.65 o 
  12   3   7      311.96      357.46     95.40 o 
  13   3   7        0.08      -47.88     86.20 o 
  14   3   7      171.10      176.88     99.00 o 
  15   3   7      112.15      328.71    113.79 o 
   0   4   7     3400.66     3228.71    135.95 o 
   1   4   7        7.92       22.30     35.46 o 
   2   4   7     1574.96     1630.77     45.23 o 
   3   4   7      611.45      618.97     29.98 o 
   4   4   7      633.26      665.23     41.35 o 
   5   4   7    11104.31    11205.58    152.15 o 
   6   4   7        0.10       27.06     30.38 o 
   7   4   7      608.59      619.11     45.76 o 
   8   4   7       51.48       40.74     36.62 o 
   9   4   7     2136.90     2165.73     93.87 o 
  10   4   7      548.20      447.05     90.34 o 
  11   4   7       78.84      113.94     79.33 o 
  12   4   7      648.25      503.60    103.92 o 
  13   4   7      648.95      553.44    127.08 o 
  14   4   7       12.29       36.61     95.97 o 
  15   4   7      818.74      689.78    137.37 o 
   1   5   7      730.79      773.48     58.37 o 
   2   5   7     3801.82     3786.18    107.07 o 
   3   5   7     1868.68     1837.57     60.41 o 
   4   5   7      261.85      276.70     36.47 o 
   5   5   7       18.47       42.85     28.96 o 
   6   5   7     2055.46     2127.12     65.85 o 
   7   5   7     2411.47     2344.40     75.00 o 
   8   5   7     1106.57     1024.06     98.20 o 
   9   5   7       90.81       66.26     71.03 o 
  10   5   7       32.50       45.41     71.57 o 
  11   5   7       67.18      -68.63     77.71 o 
  12   5   7      386.80      308.72     98.74 o 
  13   5   7      100.20       53.33     94.93 o 
  14   5   7       38.42      -84.28    101.09 o 
   0   6   7        2.26       42.85     57.63 o 
   1   6   7     3137.07     3089.68    164.02 o 
   2   6   7      437.18      418.77     99.74 o 
   3   6   7      642.59      591.08     46.36 o 
   4   6   7     2002.53     2003.54     68.92 o 
   5   6   7      183.41      176.96     39.88 o 
   6   6   7     1170.41     1282.44    209.83 o 
   7   6   7       59.96       89.40     62.69 o 
   8   6   7      205.43      174.78     75.75 o 
   9   6   7      226.63      274.11     82.54 o 
  10   6   7      828.38      806.64    152.94 o 
  11   6   7        1.69       13.58     81.32 o 
  12   6   7       70.00      143.75     94.56 o 
   1   7   7       31.92       -1.92     86.44 o 
   2   7   7      361.03      364.94     40.88 o 
   3   7   7       94.06       83.95     37.55 o 
   4   7   7      131.59      112.76     48.99 o 
   5   7   7      203.11      246.33     63.16 o 
   6   7   7        0.18      -57.10     57.98 o 
   7   7   7     1740.45     1786.93    144.81 o 
   8   7   7      331.63      189.63     79.89 o 
   9   7   7       60.00      -22.26     77.71 o 
  10   7   7      107.29      247.25     93.30 o 
   0   8   7     1041.10     1052.10     88.66 o 
   1   8   7     1143.05     1022.81     61.54 o 
   2   8   7        5.63       61.38    106.39 o 
   3   8   7      371.68      435.50    130.77 o 
   4   8   7      106.24      127.08     85.70 o 
   5   8   7       89.14       84.23     91.62 o 
   6   8   7      204.50      242.36     74.66 o 
   7   8   7        6.31      -37.32     73.88 o 
   8   8   7      601.50      607.71    101.34 o 
   1   9   7      100.95       -5.91     62.06 o 
   2   9   7       38.43      180.28     75.36 o 
   3   9   7      632.91      630.97    100.48 o 
   0   0   8      617.04      568.90     66.50 o 
   1   0   8    18042.04    18074.49    498.71 o 
   2   0   8       63.68      129.68     41.26 o 
   3   0   8      629.17      627.53     45.50 o 
   4   0   8    20980.85    21493.91    282.23 o 
   5   0   8     3633.87     3951.11     91.77 o 
   6   0   8        3.77       32.21     33.98 o 
   7   0   8      808.96      723.88     53.59 o 
   8   0   8    12393.39    12810.04    244.25 o 
   9   0   8       28.95       56.16     62.11 o 
  10   0   8        1.41       27.78     66.20 o 
  11   0   8      436.96      531.63     96.79 o 
  12   0   8     2158.38     2166.41    166.24 o 
  13   0   8     8269.92     8032.07    272.07 o 
  14   0   8      253.84      239.95    101.55 o 
  15   0   8      245.22      369.55    113.53 o 
  16   0   8        9.50      138.68    138.16 o 
   1   1   8       70.96       56.09     26.52 o 
   2   1   8     7150.54     7185.30    102.02 o 
   3   1   8     1445.63     1514.54     45.41 o 
   4   1   8       47.67       65.62     28.15 o 
   5   1   8     3387.33     3475.88     64.89 o 
   6   1   8     7247.23     7874.49    100.49 o 
   7   1   8    31434.12    32338.71    345.65 o 
   8   1   8      686.82      775.72     48.19 o 
   9   1   8      152.05       98.75     38.35 o 
  10   1   8        0.08       79.59     47.54 o 
  11   1   8      366.82      299.20     59.55 o 
  12   1   8      537.23      593.02     71.00 o 
  13   1   8       83.22       12.73     55.66 o 
  14   1   8       19.70      -22.16     61.01 o 
  15   1   8       73.20       29.45     68.15 o 
  16   1   8      466.67      271.97    123.18 o 
   0   2   8     2074.56     2055.44    116.74 o 
   1   2   8     3141.89     3165.29     79.30 o 
   2   2   8     9211.06     9344.96    137.75 o 
   3   2   8       16.60       -5.05     17.51 o 
   4   2   8     3934.03     3849.49     64.74 o 
   5   2   8       32.72      -14.62     27.68 o 
   6   2   8      678.90      738.85     45.22 o 
   7   2   8      729.54      734.18     43.38 o 
   8   2   8        0.94       13.90     31.13 o 
   9   2   8     2211.16     2278.96     75.09 o 
  10   2   8      907.08      911.35     63.66 o 
  11   2   8      418.00      448.21     61.25 o 
  12   2   8      104.40       80.94     55.05 o 
  13   2   8      196.87      154.77     59.56 o 
  14   2   8       45.70      -68.56    164.02 o 
  15   2   8     1727.44     1921.16    174.83 o 
  16   2   8        0.00     -111.56    111.56 o 
   1   3   8      669.67      772.29     39.29 o 
   2   3   8     7944.23     7645.12    104.24 o 
   3   3   8      521.72      549.17     32.46 o 
   4   3   8     6413.96     6495.71    102.97 o 
   5   3   8    23310.13    22279.61    491.54 o 
   6   3   8       36.19       19.03     34.26 o 
   7   3   8     3146.61     3185.65    103.42 o 
   8   3   8      197.55      187.52     40.46 o 
   9   3   8     9208.02     9006.52    157.66 o 
  10   3   8       52.57      -14.19     38.49 o 
  11   3   8      487.85      522.98     62.13 o 
  12   3   8       27.09       63.48    104.18 o 
  13   3   8      101.37       49.72     93.48 o 
  14   3   8       18.74      -20.82     90.81 o 
  15   3   8      167.45      193.37    149.24 o 
   0   4   8     2281.79     2373.56     65.55 o 
   1   4   8     4141.01     4141.81     75.93 o 
   2   4   8       42.07       55.09     16.92 o 
   3   4   8     4537.08     4335.94    106.85 o 
   4   4   8      103.76       91.41     26.66 o 
   5   4   8       91.89      110.71     30.52 o 
   6   4   8     2284.88     2377.08     70.33 o 
   7   4   8      229.94      215.53     37.90 o 
   8   4   8     1452.02     1412.70     64.58 o 
   9   4   8      212.64       82.96     49.41 o 
  10   4   8       41.06      145.21     77.80 o 
  11   4   8      192.93      151.23     82.23 o 
  12   4   8      158.57      248.28     92.92 o 
  13   4   8        1.47       21.83     91.31 o 
  14   4   8      131.84      155.03    109.58 o 
  15   4   8        1.30      270.57    117.38 o 
   1   5   8     4600.06     4683.67    124.86 o 
   2   5   8       47.93       58.14     59.85 o 
   3   5   8      680.01      673.37     35.55 o 
   4   5   8        1.36       21.41     25.93 o 
   5   5   8     2063.68     2084.89     59.07 o 
   6   5   8     1560.38     1442.39     57.33 o 
   7   5   8     5372.46     5216.20    106.21 o 
   8   5   8       81.48      113.26     67.89 o 
   9   5   8      361.09      304.03     82.94 o 
  10   5   8      121.75      224.47     80.43 o 
  11   5   8      617.78      580.75    103.43 o 
  12   5   8      187.59      187.27     98.74 o 
  13   5   8      227.67      108.76     95.94 o 
  14   5   8        3.45       59.25    102.44 o 
   0   6   8      372.42      409.31     75.36 o 
   1   6   8     2483.99     2333.06     92.98 o 
   2   6   8      204.38      195.91     44.35 o 
   3   6   8       69.79      139.48     39.25 o 
   4   6   8      237.91      225.69     38.53 o 
   5   6   8      183.01      244.14     41.34 o 
   6   6   8      216.86      200.28     67.97 o 
   7   6   8      109.56      113.04     67.92 o 
   8   6   8      917.45      934.24    101.34 o 
   9   6   8       10.36       50.57     75.14 o 
  10   6   8        1.13      -46.49     76.98 o 
  11   6   8      528.12      625.19    169.19 o 
  12   6   8      176.30       71.14     95.07 o 
   1   7   8     2009.14     1908.02     87.20 o 
   2   7   8       11.62       29.12     36.73 o 
   3   7   8     1362.52     1532.97     82.89 o 
   4   7   8      775.23      930.93    112.30 o 
   5   7   8      116.85        2.74    130.04 o 
   6   7   8      111.48       59.09     64.25 o 
   7   7   8      662.51      810.52     94.52 o 
   8   7   8       24.60      -14.20     72.07 o 
   9   7   8       65.80       71.95     81.32 o 
  10   7   8      430.00      505.47    104.97 o 
   0   8   8      402.15      333.95     73.88 o 
   1   8   8       48.04       38.42     44.18 o 
   2   8   8      947.96      923.37     68.58 o 
   3   8   8     1119.86     1274.13     89.40 o 
   4   8   8      151.76      172.89     88.66 o 
   5   8   8       58.08      171.41     97.53 o 
   6   8   8      110.77      189.14    103.44 o 
   7   8   8       46.42      104.91     75.23 o 
   8   8   8       15.75       76.84    117.47 o 
   1   9   8      223.68      162.54     69.45 o 
   2   9   8      363.39      254.16     81.27 o 
   1   1   9      590.35      570.17     35.54 o 
   2   1   9       91.30       79.47     25.70 o 
   3   1   9    13681.91    13438.96    169.82 o 
   4   1   9     3747.61     3818.57     66.27 o 
   5   1   9    22949.37    23277.56    253.26 o 
   6   1   9     4643.53     5293.84     80.69 o 
   7   1   9     9667.29     9785.30    139.81 o 
   8   1   9      130.39      121.50     35.64 o 
   9   1   9     3357.94     3444.46     94.86 o 
  10   1   9      204.27      269.34     54.65 o 
  11   1   9     1987.44     1836.51     95.59 o 
  12   1   9        4.15      -52.14     52.14 o 
  13   1   9      135.08      227.35     65.23 o 
  14   1   9        3.15      -59.49     59.49 o 
  15   1   9      334.13      341.88     77.24 o 
  16   1   9       93.89      203.92    118.07 o 
   1   2   9     1254.96     1257.88     55.08 o 
   2   2   9     9643.86     9334.27    139.98 o 
   3   2   9     3154.82     3206.63     78.10 o 
   4   2   9     1120.05     1179.18     39.90 o 
   5   2   9    10633.01    10454.13    149.32 o 
   6   2   9      561.27      548.31     42.77 o 
   7   2   9      753.80      779.17     50.33 o 
   8   2   9      551.05      575.40     44.72 o 
   9   2   9     3781.55     3704.67     91.72 o 
  10   2   9      534.31      621.03     53.14 o 
  11   2   9     2199.88     2346.06    106.08 o 
  12   2   9      968.50      994.32     80.52 o 
  13   2   9      196.29      141.78     64.33 o 
  14   2   9      133.56       59.63     97.19 o 
  15   2   9        2.48     -114.52    114.52 o 
  16   2   9      265.25      354.74    127.46 o 
   1   3   9     1300.41     1222.84     40.61 o 
   2   3   9        1.48        3.57     21.02 o 
   3   3   9     3927.93     3970.18     94.27 o 
   4   3   9       56.85       46.90     26.16 o 
   5   3   9     1146.47     1248.29     59.43 o 
   6   3   9     1045.46      941.41     56.12 o 
   7   3   9        5.00       72.88     34.78 o 
   8   3   9       69.86       34.17     37.66 o 
   9   3   9       18.88       20.82     40.80 o 
  10   3   9      427.58      523.10     68.56 o 
  11   3   9       28.60       -9.97     54.92 o 
  12   3   9      192.39      294.56     96.61 o 
  13   3   9      659.69      715.95    254.90 o 
  14   3   9      424.56      660.86    125.27 o 
  15   3   9      234.86       67.03    192.84 o 
   0   4   9     4650.68     4600.13     91.63 o 
   1   4   9      592.97      582.71     25.44 o 
   2   4   9     1238.98     1245.61     59.10 o 
   3   4   9       57.86       91.61     30.52 o 
   4   4   9     1561.72     1561.84     52.75 o 
   5   4   9      123.31       92.73     30.37 o 
   6   4   9     1753.60     1881.80     65.13 o 
   7   4   9      276.21      277.16     40.04 o 
   8   4   9      486.66      466.06     47.38 o 
   9   4   9     1199.37     1257.69    111.25 o 
  10   4   9     1927.27     1653.68    130.06 o 
  11   4   9     1460.52     1610.60    135.72 o 
  12   4   9      299.35      280.76     99.26 o 
  13   4   9      313.48      341.99    106.56 o 
  14   4   9      371.40      387.89    114.94 o 
   1   5   9     2461.04     2454.54     95.01 o 
   2   5   9      729.02      747.15    112.30 o 
   3   5   9        6.06        9.30     28.28 o 
   4   5   9       86.54      103.08     28.67 o 
   5   5   9      606.43      624.38     38.86 o 
   6   5   9     1551.62     1597.82     60.23 o 
   7   5   9     2335.79     2175.58    101.19 o 
   8   5   9      838.62      934.18    102.70 o 
   9   5   9       29.53       -2.93     67.39 o 
  10   5   9        3.69      -45.04     74.16 o 
  11   5   9        5.28       49.81     80.93 o 
  12   5   9     1339.51     1145.35    133.90 o 
  13   5   9      380.58      489.74    114.24 o 
   0   6   9     2013.77     2036.23    130.04 o 
   1   6   9       17.61      111.18     45.37 o 
   2   6   9      362.63      320.46     51.96 o 
   3   6   9     2070.37     2118.64     82.16 o 
   4   6   9     1550.12     1489.36     72.54 o 
   5   6   9      617.81      592.64     57.35 o 
   6   6   9      160.45      179.60     65.30 o 
   7   6   9      444.93      605.43     85.68 o 
   8   6   9      515.73      636.55     90.38 o 
   9   6   9      711.47      646.33     98.54 o 
  10   6   9       17.79       12.95     77.80 o 
  11   6   9      111.11      213.43     90.16 o 
  12   6   9      456.61      556.94    115.28 o 
   1   7   9       75.39      143.93     49.08 o 
   2   7   9      293.67      308.05     54.67 o 
   3   7   9      734.25      760.22     71.67 o 
   4   7   9     1655.88     1553.03    138.90 o 
   5   7   9      932.65      660.52    113.78 o 
   6   7   9        6.79       75.69     64.25 o 
   7   7   9      135.23       65.41     90.88 o 
   8   7   9        3.18       -2.59     73.66 o 
   9   7   9       48.78       52.05    164.02 o 
  10   7   9      918.02      937.92    120.60 o 
   0   8   9      344.53      350.21     78.32 o 
   1   8   9      663.99      591.91     62.46 o 
   2   8   9      145.46      173.41     53.93 o 
   3   8   9       30.87       48.44     52.52 o 
   4   8   9      226.61      254.16     94.57 o 
   5   8   9      447.65      444.78    110.83 o 
   6   8   9       10.19        0.00     99.00 o 
   7   8   9      117.75      166.98    107.87 o 
   1   9   9       22.03        8.10     45.37 o 
   2   9   9        0.85      -24.78     47.12 o 
   0   0  10      632.37      653.13     78.32 o 
   1   0  10     4600.13     4453.93    124.34 o 
   2   0  10    45497.55    45154.66   1083.13 o 
   3   0  10       51.92       38.29     38.28 o 
   4   0  10      176.42        8.88     47.02 o 
   5   0  10    27348.60    28889.25    432.54 o 
   6   0  10     3989.52     4153.58    101.39 o 
   7   0  10      256.80      297.82     45.92 o 
   8   0  10      617.24      400.43     71.57 o 
   9   0  10      533.11      562.71    142.60 o 
  10   0  10       65.01      206.88     76.10 o 
  11   0  10      632.05      737.80    102.38 o 
  12   0  10     3284.96     3686.64    359.07 o 
  13   0  10      288.78      161.67     99.75 o 
  14   0  10      519.83      421.75    107.00 o 
  15   0  10     1546.14     1754.44    198.75 o 
  16   0  10       90.72      164.02    120.16 o 
   1   1  10     8892.16     9294.90    140.92 o 
   2   1  10      486.26      519.33     39.22 o 
   3   1  10      442.62      395.30     33.96 o 
   4   1  10    18181.34    18560.52    207.82 o 
   5   1  10     1978.39     2113.22     65.76 o 
   6   1  10      905.59      857.21     44.50 o 
   7   1  10      299.23      234.98     36.08 o 
   8   1  10      110.40       69.23     35.25 o 
   9   1  10     1275.77     1342.30     68.78 o 
  10   1  10      120.24      125.48     51.10 o 
  11   1  10      453.78      376.56     61.47 o 
  12   1  10        4.87       67.36     57.12 o 
  13   1  10      101.74       59.11     63.06 o 
  14   1  10       69.03      -46.95     60.55 o 
  15   1  10      168.94       74.58     92.13 o 
  16   1  10       28.52       51.16    120.99 o 
   0   2  10    14450.80    14596.43    400.45 o 
   1   2  10      228.58      134.99     45.06 o 
   2   2  10      123.28      136.72     29.03 o 
   3   2  10     4016.29     3881.43     76.15 o 
   4   2  10     6186.82     6010.34     93.41 o 
   5   2  10     1414.34     1516.32     59.13 o 
   6   2  10      190.48      157.80     34.88 o 
   7   2  10     2331.21     2244.98     74.18 o 
   8   2  10      425.62      561.35     49.79 o 
   9   2  10     1053.22     1019.71     84.38 o 
  10   2  10      552.81      625.83     55.30 o 
  11   2  10      107.20      121.46     52.10 o 
  12   2  10     1174.12     1229.11    159.02 o 
  13   2  10      345.87      342.52     69.30 o 
  14   2  10      373.21      296.21    110.74 o 
  15   2  10      203.04      301.64    112.29 o 
  16   2  10      197.18      298.53    127.07 o 
   1   3  10      416.92      350.40     27.79 o 
   2   3  10    14454.30    14307.51    195.09 o 
   3   3  10     8871.42     8703.15    158.39 o 
   4   3  10     1461.39     1461.41     61.47 o 
   5   3  10     1043.54      993.40     54.51 o 
   6   3  10      104.53       48.46     36.38 o 
   7   3  10       31.36       33.55     34.97 o 
   8   3  10      596.71      601.47     51.08 o 
   9   3  10      239.88      260.22     46.22 o 
  10   3  10      389.08      374.87     65.07 o 
  11   3  10      256.35      245.76     86.83 o 
  12   3  10       67.86      180.66     85.97 o 
  13   3  10      537.86      630.19    317.70 o 
  14   3  10       10.02     -101.67    124.86 o 
  15   3  10       89.46     -102.60    104.91 o 
   0   4  10     2536.27     2531.82     82.01 o 
   1   4  10      537.71      572.22     32.33 o 
   2   4  10      198.28      202.53     27.37 o 
   3   4  10       27.42       29.53     34.76 o 
   4   4  10        3.13       88.85     28.29 o 
   5   4  10        4.00       17.92     29.40 o 
   6   4  10     2556.82     2467.20     73.22 o 
   7   4  10      292.76      337.74     41.92 o 
   8   4  10     1800.48     1714.25     70.53 o 
   9   4  10     1571.24     1347.21    183.97 o 
  10   4  10      516.35      400.15     91.42 o 
  11   4  10     1970.46     1803.85    139.91 o 
  12   4  10      139.77      257.93     95.07 o 
  13   4  10      626.92      614.62    117.46 o 
  14   4  10       22.82        7.14     96.65 o 
   1   5  10     1189.28     1246.28     76.19 o 
   2   5  10     2326.19     2317.25     79.35 o 
   3   5  10     1002.12      939.30     74.30 o 
   4   5  10      511.63      537.12     39.08 o 
   5   5  10        0.39       -8.84     29.07 o 
   6   5  10       23.91       11.77     32.13 o 
   7   5  10      352.96      284.91     72.07 o 
   8   5  10      373.84      380.07     78.84 o 
   9   5  10       69.66      208.01     79.93 o 
  10   5  10     2588.67     2644.81    161.41 o 
  11   5  10     1235.82     1169.81    126.42 o 
  12   5  10        9.19      -14.06     87.69 o 
  13   5  10       43.52        4.83     97.66 o 
   0   6  10       12.40       96.05     67.97 o 
   1   6  10      495.27      527.00     64.28 o 
   2   6  10      372.85      381.24     84.23 o 
   3   6  10      443.01      443.59     52.87 o 
   4   6  10        2.27        9.92     42.66 o 
   5   6  10      123.21      107.87     88.66 o 
   6   6  10      172.13      247.04     68.43 o 
   7   6  10      646.18      602.79     85.11 o 
   8   6  10      469.19      581.34     90.34 o 
   9   6  10       34.93       28.55     77.30 o 
  10   6  10      101.49      108.61     83.59 o 
  11   6  10        0.06       28.26     85.51 o 
  12   6  10       55.90      -42.51    110.83 o 
   1   7  10       20.82       74.55     72.41 o 
   2   7  10      607.22      559.47     64.55 o 
   3   7  10       15.32      -48.76     78.32 o 
   4   7  10       30.99       44.33     81.27 o 
   5   7  10      125.96       75.36     84.23 o 
   6   7  10      126.02      202.44    103.44 o 
   7   7  10       51.89       64.80     69.98 o 
   8   7  10     1472.29     1498.55    152.20 o 
   9   7  10       81.49      127.64     86.16 o 
  10   7  10       86.53      168.78    120.43 o 
   0   8  10      135.92       23.64     69.45 o 
   1   8  10       49.51       83.33     51.65 o 
   2   8  10        4.78       -6.47     50.67 o 
   3   8  10       32.46      -13.19     54.21 o 
   4   8  10       23.60       36.87     56.37 o 
   5   8  10       13.70       79.79     94.57 o 
   6   8  10      534.79      774.30    132.99 o 
   7   8  10      240.88      280.76    118.21 o 
   1   1  11    21251.71    21293.13    248.06 o 
   2   1  11      178.73      242.13     41.10 o 
   3   1  11      476.65      478.26     35.81 o 
   4   1  11      463.63      473.82     35.35 o 
   5   1  11     2712.40     2819.27     68.71 o 
   6   1  11      757.93      803.77     50.09 o 
   7   1  11     1170.74     1238.65     59.28 o 
   8   1  11     2248.42     2107.58     75.56 o 
   9   1  11        1.79       20.95     50.55 o 
  10   1  11     2762.90     2738.94    108.17 o 
  11   1  11        5.01        7.27     52.24 o 
  12   1  11     1658.81     1599.40     96.58 o 
  13   1  11       21.96      109.91     63.66 o 
  14   1  11      389.88      420.00     77.01 o 
  15   1  11      386.57      361.90     93.48 o 
  16   1  11      598.83      705.84    142.60 o 
   0   2  11     1792.14     1833.23     84.58 o 
   1   2  11     7570.08     7297.44    204.12 o 
   2   2  11       11.82       47.27     25.08 o 
   3   2  11     2630.17     2772.91     68.63 o 
   4   2  11      505.86      470.65     45.86 o 
   5   2  11     2047.58     1867.95     63.29 o 
   6   2  11     2109.72     2201.11     73.49 o 
   7   2  11      575.09      582.60     54.65 o 
   8   2  11      240.07      229.92     42.96 o 
   9   2  11     1439.07     1488.94     71.53 o 
  10   2  11      165.97      125.75     47.40 o 
  11   2  11      170.87      130.83     54.48 o 
  12   2  11       26.85       21.73     55.56 o 
  13   2  11      530.68      570.49     80.83 o 
  14   2  11       94.95       45.04     99.68 o 
  15   2  11      283.74      -21.62    102.82 o 
   1   3  11        5.92      -10.14     25.00 o 
   2   3  11        5.96       42.56     27.22 o 
   3   3  11     1236.42     1311.18     62.95 o 
   4   3  11       68.41       -3.21     29.22 o 
   5   3  11     2203.04     2278.29    119.23 o 
   6   3  11      335.54      388.67     40.13 o 
   7   3  11     6897.05     6792.34    126.78 o 
   8   3  11      740.22      862.23     57.41 o 
   9   3  11      301.87      374.58     50.25 o 
  10   3  11      714.17      738.87     79.23 o 
  11   3  11      428.83      384.72     96.54 o 
  12   3  11      167.68      176.93     91.31 o 
  13   3  11      404.79      384.50    109.65 o 
  14   3  11      134.58      137.27    101.21 o 
  15   3  11      260.07      316.22    118.07 o 
   0   4  11      187.68      305.88     43.17 o 
   1   4  11     9843.73     9600.63    141.09 o 
   2   4  11     6601.01     6768.00    112.08 o 
   3   4  11        0.84       10.82     33.62 o 
   4   4  11     3941.79     4179.68     93.21 o 
   5   4  11      777.97      863.65     65.82 o 
   6   4  11      762.24      730.08     47.73 o 
   7   4  11      478.71      481.69     46.50 o 
   8   4  11      524.14      498.31     57.45 o 
   9   4  11        3.20       79.42     71.43 o 
  10   4  11      825.59      714.80    100.50 o 
  11   4  11      756.96      843.08    113.19 o 
  12   4  11      843.25      989.76    199.49 o 
  13   4  11     1794.74     1800.37    162.45 o 
  14   4  11       37.27      150.03    135.95 o 
   1   5  11     3185.47     3166.23     76.88 o 
   2   5  11        2.80       32.82     29.96 o 
   3   5  11        3.32        4.29     23.15 o 
   4   5  11       81.35       81.25     27.17 o 
   5   5  11     3773.74     3679.00     89.75 o 
   6   5  11       90.91      138.52     36.37 o 
   7   5  11     1797.69     1625.94    216.48 o 
   8   5  11      305.14      215.10     74.70 o 
   9   5  11     1477.47     1750.38    131.05 o 
  10   5  11       78.22      132.73     80.73 o 
  11   5  11        3.03       43.59     86.72 o 
  12   5  11        4.32      -88.29     88.29 o 
  13   5  11       31.77       28.56     94.81 o 
   0   6  11     6641.33     6436.73    240.86 o 
   1   6  11      789.36      637.66     66.77 o 
   2   6  11     1254.92     1094.25     91.62 o 
   3   6  11     1975.51     1952.50    102.25 o 
   4   6  11     3265.29     3513.06    131.80 o 
   5   6  11      480.41      345.77     99.00 o 
   6   6  11      286.54      204.18    121.91 o 
   7   6  11       42.21      102.05     94.57 o 
   8   6  11      341.04      280.02     78.37 o 
   9   6  11     1039.31      843.57    105.47 o 
  10   6  11      895.70     1014.12    120.65 o 
  11   6  11     1009.40     1027.18    125.90 o 
  12   6  11      323.22      249.63    103.77 o 
   1   7  11      876.19      866.01     90.14 o 
   2   7  11      292.55      340.24    114.52 o 
   3   7  11      548.56      571.85    128.56 o 
   4   7  11        1.97      -16.25     81.27 o 
   5   7  11       49.33       56.15     87.18 o 
   6   7  11      151.50      331.00    106.39 o 
   7   7  11      234.38       84.23    103.44 o 
   8   7  11      119.07       79.36     76.16 o 
   9   7  11      391.79      355.04     92.92 o 
  10   7  11      241.06      269.20     97.49 o 
   0   8  11      194.01      196.53     82.75 o 
   1   8  11       75.56      157.09     57.44 o 
   2   8  11     1856.65     1976.15    118.95 o 
   3   8  11       53.54      155.86     59.91 o 
   4   8  11      118.08      140.45    104.18 o 
   5   8  11        5.31        0.00     91.62 o 
   6   8  11      367.47      574.81    125.60 o 
   7   8  11       49.15       73.88    112.30 o 
   0   0  12    26394.46    25226.79    650.18 o 
   1   0  12     3090.71     3116.04    132.25 o 
   2   0  12      318.54      117.13     55.41 o 
   3   0  12     2677.94     2803.08    114.52 o 
   4   0  12     3090.24     2925.72    140.03 o 
   5   0  12     2002.85     1858.40     83.57 o 
   6   0  12     3892.64     3745.25    115.15 o 
   7   0  12      448.04      479.79     74.70 o 
   8   0  12    13446.46    13290.46    313.38 o 
   9   0  12      414.74      309.54     75.70 o 
  10   0  12     7546.76     7324.79    238.17 o 
  11   0  12        2.14      -35.68     69.98 o 
  12   0  12     1392.23     1465.91    173.63 o 
  13   0  12       54.17      124.06     89.40 o 
  14   0  12      226.02      124.76    104.97 o 
  15   0  12      129.07      243.60    109.58 o 
  16   0  12      172.79       19.94    118.59 o 
   1   1  12      567.66      483.99     39.69 o 
   2   1  12       61.09       83.48     31.34 o 
   3   1  12      933.14      909.03     45.01 o 
   4   1  12     4252.85     4044.65     78.33 o 
   5   1  12      622.99      657.91     44.07 o 
   6   1  12     1415.75     1207.69     64.36 o 
   7   1  12      203.86      212.96     40.09 o 
   8   1  12     1490.62     1566.90     70.12 o 
   9   1  12      458.74      473.05     61.58 o 
  10   1  12     4126.96     4047.62    122.82 o 
  11   1  12      679.61      712.03     72.07 o 
  12   1  12        5.03       51.68     58.49 o 
  13   1  12       73.54       53.49     65.39 o 
  14   1  12     1539.44     1482.92    119.65 o 
  15   1  12       30.55      123.43    164.02 o 
  16   1  12       22.46       -9.77    140.38 o 
   0   2  12    12047.02    12481.54    254.89 o 
   1   2  12     1033.00     1148.06     50.24 o 
   2   2  12    13605.10    13840.72    177.85 o 
   3   2  12     2230.96     2471.55     86.52 o 
   4   2  12       32.11       64.15     33.11 o 
   5   2  12      770.48      841.88     53.92 o 
   6   2  12     5029.98     5162.93    131.06 o 
   7   2  12      617.72      685.08     51.02 o 
   8   2  12     3988.31     3896.23    108.42 o 
   9   2  12       59.70       40.84     43.76 o 
  10   2  12       10.00       25.62     53.70 o 
  11   2  12      238.25      301.17     70.08 o 
  12   2  12      848.33      848.22     79.68 o 
  13   2  12       15.47      -27.34     68.36 o 
  14   2  12        1.22      -30.30     92.55 o 
  15   2  12      164.41      361.29    124.34 o 
   1   3  12      777.59      759.85     52.25 o 
   2   3  12     7753.94     7529.88    147.00 o 
   3   3  12      280.44      258.38     69.36 o 
   4   3  12       58.30       17.35     19.26 o 
   5   3  12        1.80       15.36     30.03 o 
   6   3  12      111.69      113.91     35.97 o 
   7   3  12      374.20      373.77     45.03 o 
   8   3  12     2770.68     2828.79     89.43 o 
   9   3  12      576.07      591.74     56.06 o 
  10   3  12        4.05       51.95     73.09 o 
  11   3  12        5.38      126.26    101.22 o 
  12   3  12     4723.68     4870.38    214.97 o 
  13   3  12        0.70      -55.69    118.95 o 
  14   3  12      583.06      715.18    151.46 o 
  15   3  12       28.29      -77.86    109.47 o 
   0   4  12     4103.31     4199.00    150.72 o 
   1   4  12        2.73      -18.81     28.79 o 
   2   4  12     5404.76     5413.38    100.73 o 
   3   4  12        9.52       27.95     28.18 o 
   4   4  12     3324.12     3316.28     86.84 o 
   5   4  12      105.49       91.51     37.58 o 
   6   4  12       13.91       42.77     34.22 o 
   7   4  12      921.31      935.03     86.41 o 
   8   4  12      316.85      439.32     82.02 o 
   9   4  12      181.54       90.35     69.63 o 
  10   4  12       37.30       62.33     74.16 o 
  11   4  12      338.50      325.73     89.22 o 
  12   4  12      323.41      298.30    101.09 o 
  13   4  12        7.81      -19.00     97.53 o 
  14   4  12      642.58      689.56    134.24 o 
   1   5  12       14.30       -3.20     28.79 o 
   2   5  12     1352.67     1405.21     78.26 o 
   3   5  12       20.52        4.55     25.73 o 
   4   5  12       22.72        1.32     27.46 o 
   5   5  12     1928.07     2014.13     74.41 o 
   6   5  12     2120.48     2062.82     97.96 o 
   7   5  12      318.18      266.93     73.05 o 
   8   5  12        0.18       -8.75     65.73 o 
   9   5  12       67.20       45.81     75.23 o 
  10   5  12      618.69      499.26    118.95 o 
  11   5  12      178.56      130.83     87.69 o 
  12   5  12       32.41       99.80    255.64 o 
  13   5  12      139.45       53.94    100.34 o 
   0   6  12       14.23      251.20     87.18 o 
   1   6  12      104.06       59.78     51.65 o 
   2   6  12       87.17      107.31     54.67 o 
   3   6  12      273.05      222.63     61.32 o 
   4   6  12      233.81      384.19     99.00 o 
   5   6  12      154.87      181.75     91.62 o 
   6   6  12       13.71      101.96     88.66 o 
   7   6  12      171.32      238.92     74.70 o 
   8   6  12      338.18      532.52     92.35 o 
   9   6  12       30.00       96.58     79.80 o 
  10   6  12       51.37      157.82    113.78 o 
  11   6  12      454.57      146.29     96.13 o 
   1   7  12       20.42       22.17     53.29 o 
   2   7  12      230.44      301.42     62.69 o 
   3   7  12      387.31      433.29     67.82 o 
   4   7  12        1.27      -78.32     78.32 o 
   5   7  12       16.52      -53.20     85.70 o 
   6   7  12      160.52      128.56    101.96 o 
   7   7  12      156.64      115.26    107.87 o 
   8   7  12      135.97      234.95    119.69 o 
   9   7  12        1.63      -75.03     75.03 o 
  10   7  12       45.46       57.45     86.55 o 
   0   8  12     3367.64     3708.95    190.62 o 
   1   8  12      277.57      287.45     63.21 o 
   2   8  12      305.86      368.94     67.10 o 
   3   8  12      463.73      422.64    111.56 o 
   4   8  12      518.95      445.08     99.00 o 
   5   8  12        6.68       19.21     97.53 o 
   6   8  12       37.79      -50.24     99.00 o 
   7   8  12       36.05      -36.94    107.87 o 
   1   1  13    16495.71    16042.41    224.77 o 
   2   1  13       98.26       47.97     44.59 o 
   3   1  13       27.12       13.15     28.63 o 
   4   1  13      534.54      518.00     43.74 o 
   5   1  13     1211.05     1206.56     61.81 o 
   6   1  13     1764.08     1850.19     77.68 o 
   7   1  13     1622.08     1656.12     98.67 o 
   8   1  13      354.13      324.19     52.10 o 
   9   1  13      645.93      649.44     96.30 o 
  10   1  13      294.23      325.46     65.36 o 
  11   1  13      645.07      641.14     70.90 o 
  12   1  13      740.51      700.88     77.77 o 
  13   1  13      112.73      179.24     65.32 o 
  14   1  13      378.21      382.05     79.55 o 
  15   1  13     1150.76     1349.41    159.77 o 
   0   2  13       73.00       43.49     43.13 o 
   1   2  13     3792.28     4377.65     93.32 o 
   2   2  13      524.79      576.54     49.30 o 
   3   2  13      214.81      190.03     42.16 o 
   4   2  13     1411.69     1421.33     61.98 o 
   5   2  13    11181.59    10791.19    179.28 o 
   6   2  13     1813.51     1866.54     79.70 o 
   7   2  13     2835.76     2798.69    100.04 o 
   8   2  13      353.82      343.49     47.02 o 
   9   2  13     1865.99     1850.17     80.14 o 
  10   2  13      356.32      354.67    133.40 o 
  11   2  13      936.61      992.62    103.35 o 
  12   2  13       45.79       96.01     69.13 o 
  13   2  13      185.88      141.05    139.64 o 
  14   2  13       54.63      -33.25     98.22 o 
  15   2  13      241.12      373.90    123.08 o 
   1   3  13      590.47      531.60    116.76 o 
   2   3  13      184.64      182.10     50.60 o 
   3   3  13     3490.45     3272.24    121.72 o 
   4   3  13     2230.02     2241.45    111.67 o 
   5   3  13      518.43      526.88     46.20 o 
   6   3  13      994.18     1065.07     62.87 o 
   7   3  13     1092.78     1025.46     58.88 o 
   8   3  13     1348.71     1306.03     67.31 o 
   9   3  13       26.71        2.43     42.84 o 
  10   3  13        4.31        6.71     54.14 o 
  11   3  13     1891.75     1835.53    294.06 o 
  12   3  13        0.04       44.52     86.16 o 
  13   3  13       86.34       43.86     96.14 o 
  14   3  13      319.64      523.08    123.55 o 
  15   3  13      429.27      249.77    117.54 o 
   0   4  13     1119.32     1305.16     77.62 o 
   1   4  13        0.62      -16.85     26.84 o 
   2   4  13     4407.62     4321.07     91.41 o 
   3   4  13      763.98      736.56     65.69 o 
   4   4  13      386.79      470.53     63.94 o 
   5   4  13      513.88      581.26     83.18 o 
   6   4  13     2296.50     2199.79    114.32 o 
   7   4  13      547.24      526.69     48.51 o 
   8   4  13     1489.44     1425.05    114.88 o 
   9   4  13       18.40       30.29     69.34 o 
  10   4  13      140.42      251.63     87.60 o 
  11   4  13      112.79       71.11     83.28 o 
  12   4  13       63.15       52.80     92.98 o 
  13   4  13      876.09     1036.97    135.79 o 
  14   4  13       46.38       36.96    102.60 o 
   1   5  13      197.32      192.63     29.70 o 
   2   5  13      634.61      769.63     45.22 o 
   3   5  13     1819.66     1867.35     62.63 o 
   4   5  13      441.62      452.76     37.62 o 
   5   5  13     1692.13     1677.98     71.18 o 
   6   5  13      705.85      656.09    116.74 o 
   7   5  13      209.97      257.49     72.57 o 
   8   5  13      667.41      650.05    126.34 o 
   9   5  13      662.51      671.85    118.21 o 
  10   5  13      132.88      154.04     86.08 o 
  11   5  13      265.24      230.30    113.04 o 
  12   5  13       81.75       -4.25     94.57 o 
  13   5  13       30.00       14.16     96.35 o 
   0   6  13     8461.16     8910.35    307.36 o 
   1   6  13       39.53        3.44     53.80 o 
   2   6  13      235.08      249.60     62.01 o 
   3   6  13      367.54      371.61     64.68 o 
   4   6  13      616.55      509.80    109.35 o 
   5   6  13      969.57      975.26    135.95 o 
   6   6  13        9.98      100.48     91.62 o 
   7   6  13       12.72       35.46     99.00 o 
   8   6  13      708.85      632.96     97.16 o 
   9   6  13      187.04       74.87     82.37 o 
  10   6  13        3.21       94.13    111.56 o 
  11   6  13     1779.26     1794.26    153.50 o 
   1   7  13      223.63      309.71     64.25 o 
   2   7  13      114.32      141.12     59.56 o 
   3   7  13      246.54      124.79     60.36 o 
   4   7  13       58.59       94.57     93.09 o 
   5   7  13      293.71      316.22    106.39 o 
   6   7  13       20.55      -88.66     88.66 o 
   7   7  13       10.63      -69.45     99.00 o 
   8   7  13       95.64      144.81    122.65 o 
   9   7  13      469.36      635.40    146.29 o 
   0   8  13        7.63      143.33     87.18 o 
   1   8  13       62.68       45.69     57.93 o 
   2   8  13      479.87      468.32     73.99 o 
   3   8  13      375.07      302.29     69.20 o 
   4   8  13       41.15       66.11     64.38 o 
   5   8  13      166.76      171.41    100.48 o 
   6   8  13      450.74      468.42    124.12 o 
   0   0  14    17800.33    19121.06    524.57 o 
   1   0  14    49051.32    48903.81    841.64 o 
   2   0  14     1289.80     1173.40     79.93 o 
   3   0  14       16.39       20.17     46.49 o 
   4   0  14     6694.59     6773.53    152.09 o 
   5   0  14     3884.33     3505.40    193.39 o 
   6   0  14      197.40      184.22     62.59 o 
   7   0  14     1630.11     1357.98    146.29 o 
   8   0  14     3221.17     3178.47    208.35 o 
   9   0  14        1.11       10.34     88.66 o 
  10   0  14       72.69      -55.41     73.14 o 
  11   0  14      588.73      536.39     99.11 o 
  12   0  14      404.46      557.97    104.91 o 
  13   0  14      208.83      159.51     96.05 o 
  14   0  14      201.74      256.41    103.93 o 
  15   0  14     4221.43     4588.30    237.71 o 
   1   1  14     1875.03     1898.42     69.73 o 
   2   1  14     8905.07     8964.89    150.66 o 
   3   1  14      565.70      657.08     53.54 o 
   4   1  14      567.75      534.43     47.14 o 
   5   1  14     5140.36     5026.97    114.33 o 
   6   1  14     2462.10     2548.80     89.09 o 
   7   1  14     2061.38     2017.76    143.54 o 
   8   1  14      197.11       93.16     65.43 o 
   9   1  14      254.00      254.11     63.09 o 
  10   1  14      197.07      150.86     63.30 o 
  11   1  14       10.80      -23.20     61.40 o 
  12   1  14      797.49      804.79    120.73 o 
  13   1  14       18.89       95.96     65.23 o 
  14   1  14       46.65      131.42     70.53 o 
  15   1  14        0.80       65.57    116.80 o 
   0   2  14       41.39      102.89     81.27 o 
   1   2  14    13291.69    13454.98    197.60 o 
   2   2  14      841.76      922.37     59.27 o 
   3   2  14     5328.50     5460.22    129.57 o 
   4   2  14     1838.48     1912.42     84.66 o 
   5   2  14     2009.79     2137.32     80.24 o 
   6   2  14      151.32      133.77     40.86 o 
   7   2  14       78.23      138.67     44.59 o 
   8   2  14       67.68       81.21     42.30 o 
   9   2  14       65.99       45.27     48.11 o 
  10   2  14       22.37       13.48     56.09 o 
  11   2  14      570.13      550.19    100.08 o 
  12   2  14        0.97       32.94     66.63 o 
  13   2  14     3910.22     3741.68    209.51 o 
  14   2  14        1.15       56.34     97.49 o 
  15   2  14      160.55      198.47    116.34 o 
   2   3  14     4814.87     4611.87    210.57 o 
   3   3  14     1546.56     1509.25     93.48 o 
   4   3  14     1913.60     1856.19    155.89 o 
   5   3  14      433.35      501.51     62.71 o 
   6   3  14      131.35      179.47     44.02 o 
   7   3  14     1234.78     1375.24     74.62 o 
   8   3  14      201.54      234.81     46.36 o 
   9   3  14      394.92      317.22     62.72 o 
  10   3  14       78.89      153.49     62.40 o 
  11   3  14      209.24      187.32     88.29 o 
  12   3  14       52.79       39.53     83.10 o 
  13   3  14       30.74       19.61     95.97 o 
  14   3  14       58.77      149.01    109.65 o 
   0   4  14     1995.47     1962.60     91.95 o 
   1   4  14      120.75      131.64     33.18 o 
   2   4  14        4.16       -9.19     29.06 o 
   3   4  14     3795.10     3641.18     88.52 o 
   4   4  14      773.28      784.71     59.76 o 
   5   4  14        6.62       21.55     37.16 o 
   6   4  14      209.82      269.17     53.32 o 
   7   4  14     1724.94     1527.93     93.84 o 
   8   4  14        2.59       32.95     69.98 o 
   9   4  14     1282.06     1185.36    235.69 o 
  10   4  14       82.44       56.69     80.43 o 
  11   4  14      197.74      131.17    110.83 o 
  12   4  14        3.90      -10.07     90.38 o 
  13   4  14     1114.42      888.69    133.19 o 
  14   4  14       84.48      130.36    109.47 o 
   1   5  14      686.09      712.94     41.74 o 
   2   5  14        0.13       -2.31     28.67 o 
   3   5  14      456.45      456.02     42.23 o 
   4   5  14        5.62       -1.23     29.50 o 
   5   5  14     1040.71     1091.92    169.19 o 
   6   5  14      648.75      443.30    113.78 o 
   7   5  14      931.33     1086.09    147.77 o 
   8   5  14      360.10      321.43     82.02 o 
   9   5  14      145.47      244.82     83.41 o 
  10   5  14        3.04      127.65    107.87 o 
  11   5  14        1.73       86.89     87.13 o 
  12   5  14      401.36      290.36    107.62 o 
  13   5  14      364.35      311.65    109.34 o 
   0   6  14     1190.94     1251.59    128.56 o 
   1   6  14      318.85      381.79     67.39 o 
   2   6  14      181.05      122.98     90.14 o 
   3   6  14       10.63        1.48     81.27 o 
   4   6  14      371.06      362.03    104.91 o 
   5   6  14      110.06       73.88     94.57 o 
   6   6  14       52.23       66.50     91.62 o 
   7   6  14      115.74       90.14    106.39 o 
   8   6  14      204.38      438.87    122.65 o 
   9   6  14       18.27      168.45    119.69 o 
  10   6  14       25.48      -19.23    103.44 o 
  11   6  14      689.30      728.03    121.70 o 
   1   7  14       16.99       18.94     57.35 o 
   2   7  14      116.66      162.76     62.90 o 
   3   7  14      183.25      171.14     65.25 o 
   4   7  14       53.89      -90.14     90.14 o 
   5   7  14      376.63      257.11    107.87 o 
   6   7  14      195.93      350.21    115.26 o 
   7   7  14      132.49      254.16    121.17 o 
   8   7  14      348.96      353.16    134.47 o 
   9   7  14      170.47      332.48    140.38 o 
   0   8  14      450.06      497.97    109.35 o 
   1   8  14        6.61      -48.02     59.56 o 
   2   8  14      111.43      190.76     66.34 o 
   3   8  14      436.32      612.09     82.23 o 
   4   8  14      506.74      405.53     78.28 o 
   5   8  14      202.68       31.03    101.96 o 
   6   8  14        0.57       48.76    101.96 o 
   1   1  15        0.01      -18.45     27.53 o 
   2   1  15     5994.96     6193.88    188.12 o 
   3   1  15    10369.65    10229.22    170.42 o 
   4   1  15     3856.43     3757.27     99.80 o 
   5   1  15    12285.61    12108.47    208.59 o 
   6   1  15        8.73        5.14     40.02 o 
   7   1  15      853.58      781.14    105.40 o 
   8   1  15      260.42      192.84     66.87 o 
   9   1  15      289.71      258.14     78.76 o 
  10   1  15     2391.20     2462.54    185.46 o 
  11   1  15     1296.71     1304.83    103.76 o 
  12   1  15     1097.16     1048.21    119.34 o 
  13   1  15      551.60      603.37     95.13 o 
  14   1  15      291.11      304.19    111.79 o 
  15   1  15        4.23     -102.38    102.38 o 
   0   2  15        0.20       25.66     45.83 o 
   1   2  15        4.62       10.65     28.46 o 
   2   2  15     2926.39     2876.25    107.92 o 
   3   2  15      561.52      770.71     74.38 o 
   4   2  15     1113.87     1079.81    113.80 o 
   5   2  15      342.71      375.15     47.65 o 
   6   2  15      345.89      351.43     48.49 o 
   7   2  15       33.18       60.29     45.88 o 
   8   2  15      820.51      756.53     65.55 o 
   9   2  15      282.18      329.83     56.69 o 
  10   2  15     1387.62     1424.29    102.42 o 
  11   2  15      115.38      222.68     70.15 o 
  12   2  15      311.64      474.00     84.13 o 
  13   2  15      154.22       60.56    105.65 o 
  14   2  15       48.97      167.69    237.90 o 
  15   2  15      163.54        8.32    113.66 o 
   1   3  15     3754.95     3988.35    135.72 o 
   2   3  15     1024.32      961.31     62.57 o 
   3   3  15     1118.28      741.25     89.99 o 
   4   3  15      584.58      535.79     54.81 o 
   5   3  15       80.56       47.35     37.54 o 
   6   3  15      161.81      117.94     43.60 o 
   7   3  15      991.51     1038.98     69.39 o 
   8   3  15      199.58       92.57     48.80 o 
   9   3  15       52.74      117.08     59.54 o 
  10   3  15      820.82      943.12    113.36 o 
  11   3  15      373.49      468.06     99.20 o 
  12   3  15       73.26       30.42     85.97 o 
  13   3  15       35.12       -4.43     93.88 o 
  14   3  15      117.37      135.29    105.47 o 
   0   4  15       37.75       70.09     46.85 o 
   1   4  15     1895.58     1940.55     67.21 o 
   2   4  15     4824.27     4622.30    107.71 o 
   3   4  15     2275.39     2264.27     78.20 o 
   4   4  15      118.26       80.98     43.48 o 
   5   4  15      988.09      924.29     59.34 o 
   6   4  15      311.47      267.16     46.23 o 
   7   4  15       57.89      -15.58     32.04 o 
   8   4  15     1175.63     1276.71    165.50 o 
   9   4  15     2587.19     2713.92    155.31 o 
  10   4  15       93.42      254.11     89.30 o 
  11   4  15      607.65      579.35    112.61 o 
  12   4  15      298.74      351.93    109.19 o 
  13   4  15      155.96       59.53    165.50 o 
   1   5  15     1519.94     1386.40     57.81 o 
   2   5  15     2042.50     1902.91     66.68 o 
   3   5  15      424.84      487.49     42.20 o 
   4   5  15      179.89      212.36     39.54 o 
   5   5  15        3.35       39.90     88.66 o 
   6   5  15      552.70      431.48    115.26 o 
   7   5  15       93.39      186.19    100.48 o 
   8   5  15     1199.08     1018.12    153.68 o 
   9   5  15      563.29      502.41    137.42 o 
  10   5  15       77.73      150.74     85.37 o 
  11   5  15      584.99      284.94    101.87 o 
  12   5  15      702.23      606.75    121.56 o 
   0   6  15    11359.91    12081.44    391.58 o 
   1   6  15      347.43      416.63     88.66 o 
   2   6  15      313.17      289.51     66.29 o 
   3   6  15        4.41      135.95     91.62 o 
   4   6  15      702.04      675.30    119.69 o 
   5   6  15       66.73      -16.25     94.57 o 
   6   6  15       15.35       -4.43     91.62 o 
   7   6  15      227.12      101.96    110.83 o 
   8   6  15      141.16      125.60    112.30 o 
   9   6  15      869.79      766.91    156.63 o 
  10   6  15      370.19      339.86    141.86 o 
  11   6  15      668.16      864.67    285.19 o 
   1   7  15      306.02      217.41    104.91 o 
   2   7  15      802.60      660.92    138.90 o 
   3   7  15       31.30       79.35    101.96 o 
   4   7  15      405.31      400.45    116.74 o 
   5   7  15       12.36       36.94     97.53 o 
   6   7  15     1211.56     1173.27    159.59 o 
   7   7  15       16.18      -33.99    104.91 o 
   8   7  15      338.56      292.58    135.95 o 
   9   7  15       30.00       39.90    115.26 o 
   0   8  15        1.00      181.75     94.57 o 
   1   8  15       31.30       21.45     62.59 o 
   2   8  15      986.20     1054.09     96.54 o 
   3   8  15        4.56       92.59     67.10 o 
   4   8  15      183.86      175.71     72.94 o 
   5   8  15      162.11      246.77    118.21 o 
   0   0  16     1893.94     1813.10    140.38 o 
   1   0  16      442.92      584.02     79.79 o 
   2   0  16      387.84      305.71     59.56 o 
   3   0  16      178.22      298.98     99.00 o 
   4   0  16    15822.65    15638.79    273.85 o 
   5   0  16     7848.75     8130.73    220.40 o 
   6   0  16        1.68      -69.45     70.93 o 
   7   0  16        0.54       -2.96     85.70 o 
   8   0  16        5.50       70.93     99.00 o 
   9   0  16     6047.46     6373.19    313.27 o 
  10   0  16      562.94      435.91    124.12 o 
  11   0  16     1861.12     2167.74    218.70 o 
  12   0  16       27.14     -115.26    115.26 o 
  13   0  16      151.96     -122.65    122.65 o 
  14   0  16      691.24      533.44    172.89 o 
  15   0  16       17.63     -149.24    150.72 o 
   1   1  16     6970.61     7348.89    135.86 o 
   2   1  16     6023.26     6339.04    149.11 o 
   3   1  16     3040.90     3004.95    103.21 o 
   4   1  16     1669.38     1762.74    127.85 o 
   5   1  16      303.87      375.90     47.99 o 
   6   1  16     1805.04     1666.30     78.82 o 
   7   1  16     3219.36     3117.60    119.29 o 
   8   1  16      486.13      557.00     85.68 o 
   9   1  16       17.72      -40.40     66.20 o 
  10   1  16     1900.90     1818.94    137.50 o 
  11   1  16     1340.33     1290.69    125.90 o 
  12   1  16       22.52      122.16     78.25 o 
  13   1  16      676.81      709.53     99.41 o 
  14   1  16      140.37       69.24    103.19 o 
  15   1  16      406.31      491.90    133.55 o 
   0   2  16       45.17      109.81     49.43 o 
   1   2  16       96.37      161.10     36.03 o 
   2   2  16     5336.82     5258.35    132.24 o 
   3   2  16      629.64      638.35     56.72 o 
   4   2  16     1955.37     1764.97    116.18 o 
   5   2  16     1313.69     1404.85     71.44 o 
   6   2  16     3030.99     2961.99     96.75 o 
   7   2  16      145.49      199.15     50.06 o 
   8   2  16      531.35      588.27     73.18 o 
   9   2  16        0.23      -60.70     60.70 o 
  10   2  16      333.63      320.93     83.99 o 
  11   2  16     1896.39     1910.42    119.23 o 
  12   2  16     1626.38     1610.30    145.14 o 
  13   2  16       84.09       68.13     96.75 o 
  14   2  16        1.88        4.78    103.30 o 
  15   2  16       17.55      -87.58    123.39 o 
   1   3  16      332.55      366.28     42.44 o 
   2   3  16     1514.22     1457.13     62.85 o 
   3   3  16        0.08      -31.86     32.72 o 
   4   3  16      152.41       76.43     55.28 o 
   5   3  16     4057.50     3951.85    107.10 o 
   6   3  16      904.29      894.88     65.05 o 
   7   3  16      663.84      691.84     66.54 o 
   8   3  16     2526.03     2518.84    101.79 o 
   9   3  16     6077.11     5710.93    206.24 o 
  10   3  16     1418.96     1425.62    131.05 o 
  11   3  16       23.71      178.20     92.43 o 
  12   3  16      255.80      339.30    101.84 o 
  13   3  16       28.58       97.85    101.21 o 
  14   3  16        0.12       22.90    106.58 o 
   0   4  16     1426.82     1355.39     99.74 o 
   1   4  16        8.84       -6.36     31.46 o 
   2   4  16     1711.60     1725.06     68.61 o 
   3   4  16      611.89      575.25     45.20 o 
   4   4  16      495.47      534.07     57.09 o 
   5   4  16       25.86       57.65     39.27 o 
   6   4  16      636.70      632.89     70.92 o 
   7   4  16     1944.55     1793.89    180.28 o 
   8   4  16     2127.59     1904.72    195.05 o 
   9   4  16       70.97       50.24    116.74 o 
  10   4  16      151.19       96.89     82.67 o 
  11   4  16     1574.65     1522.75    141.06 o 
  12   4  16      169.73      290.96    105.96 o 
  13   4  16       22.56       -4.95    102.33 o 
   1   5  16      103.00      119.78     34.43 o 
   2   5  16       24.61      -16.90     31.68 o 
   3   5  16     3415.18     3472.98     90.50 o 
   4   5  16       17.62       41.37     85.70 o 
   5   5  16     2749.32     2643.55    193.57 o 
   6   5  16      361.92      116.74    106.39 o 
   7   5  16        0.02      -93.09     93.09 o 
   8   5  16      761.01      836.36    153.68 o 
   9   5  16       73.15     -104.91    104.91 o 
  10   5  16      752.00      731.45    164.02 o 
  11   5  16      828.14      784.64    169.93 o 
  12   5  16      186.56      126.60    144.07 o 
   0   6  16      907.44     1117.12    130.04 o 
   1   6  16       17.44      -15.92     56.88 o 
   2   6  16      365.40      433.19     73.61 o 
   3   6  16      589.33      520.14    115.26 o 
   4   6  16      657.47      787.60    124.12 o 
   5   6  16      172.45      202.44    101.96 o 
   6   6  16      853.76      741.79    134.47 o 
   7   6  16      567.85      397.49    119.69 o 
   8   6  16       14.52      -91.62    104.91 o 
   9   6  16       26.60       17.73    109.35 o 
  10   6  16       16.43      -51.72    118.21 o 
   1   7  16     1332.84     1271.15    101.87 o 
   2   7  16      162.85       94.76     65.30 o 
   3   7  16     1828.31     1963.20    119.61 o 
   4   7  16      226.59      166.98    104.91 o 
   5   7  16       42.53      187.66    109.35 o 
   6   7  16      679.94      935.37    150.72 o 
   7   7  16       10.19       63.54    115.26 o 
   8   7  16       61.25       96.05    124.12 o 
   0   8  16     1468.58     1498.36    152.20 o 
   1   8  16      221.80      314.41     95.31 o 
   2   8  16      320.06      422.14     81.42 o 
   3   8  16       39.38      177.73     70.96 o 
   4   8  16       42.58       71.61     83.49 o 
   5   8  16      152.89      159.92     77.59 o 
   1   1  17     1661.10     1859.15    111.55 o 
   2   1  17    10640.43    10606.09    204.15 o 
   3   1  17     1626.65     1727.30     84.99 o 
   4   1  17     9165.62     9320.06    192.48 o 
   5   1  17     1293.91     1270.25     71.89 o 
   6   1  17      358.37      398.73     75.52 o 
   7   1  17     4059.67     3696.44    160.32 o 
   8   1  17     1095.87     1035.77    104.35 o 
   9   1  17       12.40      -25.19     65.60 o 
  10   1  17      145.65      -27.67     71.52 o 
  11   1  17      412.71      366.56    149.24 o 
  12   1  17        9.99       26.82     83.02 o 
  13   1  17        7.33      -82.02     82.02 o 
  14   1  17      718.89      976.74    209.83 o 
  15   1  17      255.87     -101.96    141.86 o 
   0   2  17       22.41      -19.21     45.97 o 
   1   2  17    10066.84     9826.34    216.91 o 
   2   2  17     6188.56     5952.26    123.71 o 
   3   2  17      567.98      596.93     58.41 o 
   4   2  17     1740.31     1725.00    157.64 o 
   5   2  17      194.27      161.30     43.10 o 
   6   2  17      655.09      749.82     61.31 o 
   7   2  17     3017.09     2944.74    106.16 o 
   8   2  17     1461.15     1373.74     99.03 o 
   9   2  17       87.37       66.61     67.32 o 
  10   2  17        3.31       19.43     72.05 o 
  11   2  17     1067.05     1183.24    206.87 o 
  12   2  17     1619.79     1770.25    221.65 o 
  13   2  17      499.85      472.82    121.15 o 
  14   2  17        1.54       69.61    113.04 o 
   1   3  17     1070.01     1087.47     58.36 o 
   2   3  17       46.91       11.35     34.05 o 
   3   3  17       32.95        6.79     34.64 o 
   4   3  17      708.70      759.99     65.69 o 
   5   3  17      749.10      699.66     57.79 o 
   6   3  17      228.60      264.33     51.01 o 
   7   3  17      556.91      613.84     62.04 o 
   8   3  17      238.55      301.79     78.67 o 
   9   3  17      645.30      939.83    189.14 o 
  10   3  17     1408.98     1440.73    192.10 o 
  11   3  17      111.11       69.45    134.47 o 
  12   3  17      949.02      827.87    219.43 o 
  13   3  17        7.25     -175.84    175.84 o 
  14   3  17      288.33      529.67    229.78 o 
   0   4  17     5856.68     5726.29    237.17 o 
   1   4  17     1302.55     1384.35     63.63 o 
   2   4  17     1428.78     1401.00     76.52 o 
   3   4  17     1881.73     2067.81    128.04 o 
   4   4  17      687.93      714.53     62.36 o 
   5   4  17      707.45      696.74    106.00 o 
   6   4  17       92.45       45.21    104.91 o 
   7   4  17       68.09       53.20     96.05 o 
   8   4  17       82.89      116.74    115.26 o 
   9   4  17      116.05      134.47    109.35 o 
  10   4  17       72.75      153.68    125.60 o 
  11   4  17       48.68       -2.96    116.74 o 
  12   4  17      358.77      505.36    159.59 o 
  13   4  17      342.00      493.88    125.33 o 
   1   5  17      131.58      130.61     36.85 o 
   2   5  17      759.24      600.74     79.39 o 
   3   5  17     2236.58     2132.28    177.32 o 
   4   5  17     2083.10     1952.00    175.84 o 
   5   5  17       16.49       29.55     94.57 o 
   6   5  17      188.45      183.23    101.96 o 
   7   5  17        1.43      -10.34     90.14 o 
   8   5  17      170.72      239.38    119.69 o 
   9   5  17       53.92       42.85    118.21 o 
  10   5  17     1029.91     1405.26    195.05 o 
  11   5  17      281.66      452.17    159.59 o 
  12   5  17      456.21      536.39    180.28 o 
   0   6  17      798.98      917.63    125.60 o 
   1   6  17      283.46      319.72     68.94 o 
   2   6  17      518.56      634.11     81.32 o 
   3   6  17      844.52      940.18     90.83 o 
   4   6  17      185.68      271.89    107.87 o 
   5   6  17      650.89      725.54    137.42 o 
   6   6  17     1110.29     1105.30    158.11 o 
   7   6  17       26.39      -35.46    101.96 o 
   8   6  17      408.79      305.88    131.51 o 
   9   6  17       12.58      -20.69    115.26 o 
  10   6  17      580.29      662.00    165.50 o 
   1   7  17        5.33       50.03     65.43 o 
   2   7  17      770.39      806.58     89.22 o 
   3   7  17      144.58      177.77     70.84 o 
   4   7  17       73.17       -6.54     67.24 o 
   5   7  17      268.09      189.14    116.74 o 
   6   7  17        6.08      -94.57     94.57 o 
   7   7  17      235.77      242.34    130.04 o 
   8   7  17        0.08     -101.96    101.96 o 
   0   8  17        2.86       97.53     97.53 o 
   1   8  17       65.97        6.45    156.63 o 
   2   8  17        0.21      -44.85     64.68 o 
   3   8  17      149.22      277.42     79.95 o 
   4   8  17      843.36     1005.62    125.60 o 
   0   0  18     5059.89     4833.46    229.04 o 
   1   0  18     1514.05     1542.94    215.00 o 
   2   0  18     5237.89     4972.12    210.57 o 
   3   0  18      491.58      460.39     71.67 o 
   4   0  18      772.84      633.92    107.87 o 
   5   0  18     4953.38     4505.42    231.99 o 
   6   0  18      464.11      335.43    107.87 o 
   7   0  18       30.55       26.60     88.66 o 
   8   0  18     6899.86     7100.21    326.57 o 
   9   0  18      271.43      200.96    121.17 o 
  10   0  18      796.39      774.30    147.77 o 
  11   0  18     2034.51     2223.89    229.04 o 
  12   0  18      449.92      271.89    135.95 o 
  13   0  18       93.65       75.36    130.04 o 
  14   0  18        5.68      178.80    159.59 o 
   1   1  18      363.99      315.02     45.43 o 
   2   1  18     1091.75     1037.47     60.16 o 
   3   1  18      180.51       86.41     45.89 o 
   4   1  18     5468.31     5747.65    321.01 o 
   5   1  18     3157.18     3179.18    117.71 o 
   6   1  18       24.96      -52.46     64.28 o 
   7   1  18      990.73      949.95     98.54 o 
   8   1  18      430.46      450.13     88.29 o 
   9   1  18     2117.20     2191.16    147.85 o 
  10   1  18     1689.35     1704.65    141.12 o 
  11   1  18      345.92      244.98     89.33 o 
  12   1  18      120.22      171.06    115.26 o 
  13   1  18        5.92      -84.62     84.62 o 
  14   1  18      168.79      202.44    166.98 o 
   0   2  18     6019.36     5497.53    171.76 o 
   1   2  18       18.32       47.97     36.79 o 
   2   2  18      441.07      480.83     47.17 o 
   3   2  18       80.18       52.77     51.80 o 
   4   2  18      857.05      852.33     69.77 o 
   5   2  18      215.97      189.92     51.40 o 
   6   2  18     2018.67     2129.33     92.88 o 
   7   2  18       39.20       34.31     55.63 o 
   8   2  18      509.74      594.95     87.30 o 
   9   2  18     2099.53     2142.79    143.67 o 
  10   2  18      226.07      333.80    147.77 o 
  11   2  18       14.77      -39.60     76.75 o 
  12   2  18       41.58     -119.69    134.47 o 
  13   2  18       52.95      279.28    158.11 o 
  14   2  18      110.96       29.55    152.20 o 
   1   3  18     3471.71     3517.62    135.22 o 
   2   3  18      362.64      405.98     45.67 o 
   3   3  18      678.45      627.47     52.25 o 
   4   3  18       59.90       24.32     46.86 o 
   5   3  18     8485.46     8267.06    241.22 o 
   6   3  18    13812.92    14231.03    249.45 o 
   7   3  18     4870.79     4569.36    130.27 o 
   8   3  18     1348.96     1531.68    121.81 o 
   9   3  18        0.09      -94.57     94.57 o 
  10   3  18       23.57        8.87    119.69 o 
  11   3  18      224.68      104.91    132.99 o 
  12   3  18      143.64       44.33    138.90 o 
  13   3  18      544.41      616.19    186.19 o 
   0   4  18     5377.57     5474.24    164.52 o 
   1   4  18      149.51       89.19     45.70 o 
   2   4  18     1328.79     1311.34     76.04 o 
   3   4  18     1073.00      924.08     67.41 o 
   4   4  18      918.72      680.01    105.36 o 
   5   4  18     1582.13     1456.22    115.92 o 
   6   4  18      135.19       88.66     93.09 o 
   7   4  18       31.51       -5.91     96.05 o 
   8   4  18       30.29       19.21    107.87 o 
   9   4  18      255.21      295.53    130.04 o 
  10   4  18      408.10      242.34    130.04 o 
  11   4  18       96.69       57.63    138.90 o 
  12   4  18      137.44       19.21    132.99 o 
  13   4  18       56.65      211.31    165.50 o 
   1   5  18       19.94       -1.75     90.88 o 
   2   5  18        0.33      -25.08     59.45 o 
   3   5  18     2089.13     2222.42    184.71 o 
   4   5  18      886.10      755.09    132.99 o 
   5   5  18        9.71      141.86    101.96 o 
   6   5  18        4.99       50.24    100.48 o 
   7   5  18      108.47      100.48    110.83 o 
   8   5  18     1140.98     1080.18    165.50 o 
   9   5  18       99.30      153.68    127.08 o 
  10   5  18      233.42      198.01    134.47 o 
  11   5  18        8.29      -66.50    132.99 o 
   0   6  18      110.23      -81.27     81.27 o 
   1   6  18        0.57       48.38     63.21 o 
   2   6  18       14.55       29.47     61.85 o 
   3   6  18       12.47       13.35     66.05 o 
   4   6  18      341.87      205.40    107.87 o 
   5   6  18      408.67      360.55    119.69 o 
   6   6  18      172.96      229.04    113.78 o 
   7   6  18       66.31      -13.30    107.87 o 
   8   6  18       31.42      -39.90    104.91 o 
   9   6  18      153.39        7.39    119.69 o 
  10   6  18     1277.92      963.44    184.71 o 
   1   7  18     1091.52     1131.20    102.40 o 
   2   7  18      209.02      284.32     75.62 o 
   3   7  18       18.07      -60.02     60.02 o 
   4   7  18      162.70      163.49     75.90 o 
   5   7  18      131.83      121.17    112.30 o 
   6   7  18       69.77      -60.58    106.39 o 
   7   7  18      457.24      472.85    141.86 o 
   0   8  18      208.19      267.46    107.87 o 
   1   8  18        1.19       33.74     69.48 o 
   2   8  18      200.06      269.27     80.85 o 
   3   8  18       40.49       77.58     74.19 o 
   1   1  19     3510.14     3512.69    147.59 o 
   2   1  19     1472.21     1233.72    113.04 o 
   3   1  19      917.41     1031.81    155.08 o 
   4   1  19       40.94       79.34     48.67 o 
   5   1  19      520.64      441.45     95.69 o 
   6   1  19      497.54      505.21     82.37 o 
   7   1  19    13897.35    14012.62    340.05 o 
   8   1  19     1915.90     1907.06    137.25 o 
   9   1  19     3432.98     3474.68    174.17 o 
  10   1  19       49.97      234.63     87.69 o 
  11   1  19       51.32       48.18     82.37 o 
  12   1  19      267.91      235.55    100.29 o 
  13   1  19      129.00      230.52    153.68 o 
  14   1  19      525.77      506.84    189.14 o 
   0   2  19     2709.48     2732.58    126.42 o 
   1   2  19     1359.91     1343.67     72.09 o 
   2   2  19      706.08      720.67     54.77 o 
   3   2  19       35.26       60.43     45.61 o 
   4   2  19      477.28      566.27     66.14 o 
   5   2  19     1505.36     1525.74     80.30 o 
   6   2  19     4201.71     4187.71    123.87 o 
   7   2  19        2.18      -53.85     53.85 o 
   8   2  19     5594.57     5319.40    199.99 o 
   9   2  19      129.13       94.73     71.28 o 
  10   2  19        1.60      -26.14     75.36 o 
  11   2  19        1.03     -104.91    104.91 o 
  12   2  19       98.02      223.13    152.20 o 
  13   2  19     1005.72     1117.12    208.35 o 
  14   2  19      838.45      830.45    199.49 o 
   1   3  19     3282.06     3338.21     96.84 o 
   2   3  19      172.88      257.52     44.97 o 
   3   3  19       20.90       39.90     38.56 o 
   4   3  19       11.27       43.17     58.09 o 
   5   3  19     4701.28     4497.58    121.66 o 
   6   3  19     5343.86     5545.52    154.84 o 
   7   3  19      341.46      341.61     78.90 o 
   8   3  19      757.11      849.66    122.65 o 
   9   3  19      542.71      610.28    149.24 o 
  10   3  19      105.64      137.42    131.51 o 
  11   3  19       75.69       81.27    132.99 o 
  12   3  19       39.62      -78.32    132.99 o 
  13   3  19      506.44      282.24    171.41 o 
   0   4  19     2823.72     2744.03    187.66 o 
   1   4  19       10.93      -18.32     28.75 o 
   2   4  19     1520.85     1285.38    193.35 o 
   3   4  19        0.83       48.74     30.93 o 
   4   4  19       66.23       49.60     56.95 o 
   5   4  19      678.89      701.89    132.99 o 
   6   4  19     2753.23     2503.17    212.78 o 
   7   4  19     1172.23     1236.81    166.98 o 
   8   4  19     2983.57     2707.09    231.99 o 
   9   4  19        6.15      -17.73    107.87 o 
  10   4  19       10.72       23.64    115.26 o 
  11   4  19        0.45       66.50    140.38 o 
  12   4  19     1010.18     1170.32    200.96 o 
   1   5  19       16.22      108.45     64.20 o 
   2   5  19     1699.14     1700.74    195.05 o 
   3   5  19     1912.67     2136.71    184.71 o 
   4   5  19     1193.27     1112.69    150.72 o 
   5   5  19      414.69      421.14    122.65 o 
   6   5  19      173.50      261.55    119.69 o 
   7   5  19        2.77       11.82    109.35 o 
   8   5  19       98.96      134.47    118.21 o 
   9   5  19     1550.87     1192.48    184.71 o 
  10   5  19       25.51       69.45    122.65 o 
  11   5  19      931.41     1093.48    205.40 o 
   0   6  19        9.68      -45.81     91.62 o 
   1   6  19      226.34      159.86    132.25 o 
   2   6  19      434.38      445.48     81.00 o 
   3   6  19      194.95      171.16     73.39 o 
   4   6  19        8.19       -4.43     99.00 o 
   5   6  19       91.04       84.23    109.35 o 
   6   6  19       84.35      -84.23     99.00 o 
   7   6  19      173.29      -57.63    106.39 o 
   8   6  19       64.56      128.56    131.51 o 
   9   6  19      152.77      119.69    138.90 o 
   1   7  19      242.22      278.83     91.62 o 
   2   7  19      178.51      145.70     73.05 o 
   3   7  19       28.79       75.25     72.48 o 
   4   7  19        2.84       14.97     70.96 o 
   5   7  19       20.36        7.39    106.39 o 
   6   7  19       18.69      -93.09    110.83 o 
   7   7  19      627.33     1047.67    169.93 o 
   0   8  19      441.24      678.25    132.99 o 
   1   8  19        5.06      -19.41     70.06 o 
   2   8  19        1.03      101.96    104.91 o 
   0   0  20     1601.45     1353.55    137.42 o 
   1   0  20     6103.28     6527.79    296.27 o 
   2   0  20       64.13       -9.60     53.29 o 
   3   0  20     9917.71    10235.82    372.37 o 
   4   0  20     8979.37     9352.18    357.60 o 
   5   0  20     2092.46     1932.79    174.37 o 
   6   0  20        4.79      -81.27     81.27 o 
   7   0  20     5969.16     5629.93    289.62 o 
   8   0  20       40.87       28.08    107.87 o 
   9   0  20       39.41      -67.97    104.91 o 
  10   0  20     2302.02     2340.63    224.61 o 
  11   0  20     2260.59     2543.07    254.16 o 
  12   0  20       66.86      122.65    132.99 o 
  13   0  20     2355.25     2537.16    264.50 o 
  14   0  20       35.36     -147.77    147.77 o 
   1   1  20     1106.11     1196.19     66.81 o 
   2   1  20       82.43      103.74     36.89 o 
   3   1  20      149.64      172.36     56.99 o 
   4   1  20      182.57      145.44     55.14 o 
   5   1  20       38.90       66.56     61.54 o 
   6   1  20      588.07      577.08     86.08 o 
   7   1  20       76.22       33.96     69.98 o 
   8   1  20      568.62      621.89     99.68 o 
   9   1  20      133.37        3.75     75.32 o 
  10   1  20      797.63      815.68    178.06 o 
  11   1  20      160.60      244.67    112.30 o 
  12   1  20       49.61       31.21     93.83 o 
  13   1  20      205.88       82.75    143.33 o 
  14   1  20       29.64      260.07    159.59 o 
   0   2  20     1503.44     1498.51    102.33 o 
   1   2  20     1811.87     1882.62    140.34 o 
   2   2  20       57.51       19.76     38.77 o 
   3   2  20     3074.25     3130.30    115.56 o 
   4   2  20      928.89      937.60     76.66 o 
   5   2  20    10069.74    10266.29    206.03 o 
   6   2  20      759.42      672.85     77.09 o 
   7   2  20      155.45      217.20    102.70 o 
   8   2  20      119.99       62.95    150.72 o 
   9   2  20      497.73      395.60     90.01 o 
  10   2  20      188.64       27.41     84.33 o 
  11   2  20     1461.36     1287.05    200.96 o 
  12   2  20      330.08      486.15    156.63 o 
  13   2  20       22.98       47.29    149.24 o 
   1   3  20     4170.10     4157.82    157.62 o 
   2   3  20      105.18       62.60     41.34 o 
   3   3  20      275.84      254.42     53.96 o 
   4   3  20     1960.71     1968.67     96.07 o 
   5   3  20      624.58      661.49     78.98 o 
   6   3  20      259.93      324.60     67.98 o 
   7   3  20      908.63      842.52     99.29 o 
   8   3  20      131.13      248.25    124.12 o 
   9   3  20      265.76      189.14    132.99 o 
  10   3  20      195.49      146.29    138.90 o 
  11   3  20      123.93      112.30    140.38 o 
  12   3  20      138.78      115.26    147.77 o 
  13   3  20      386.11      316.22    178.80 o 
   0   4  20      283.51      206.87     96.05 o 
   1   4  20      242.74      407.68    110.09 o 
   2   4  20       89.97       51.33     30.29 o 
   3   4  20     1295.26     1125.03     92.36 o 
   4   4  20      229.67      376.35     70.27 o 
   5   4  20     4091.55     4183.29    249.73 o 
   6   4  20      272.70      295.53    121.17 o 
   7   4  20       90.82      -14.78    112.30 o 
   8   4  20       35.14      -56.15    112.30 o 
   9   4  20      948.95      988.56    168.45 o 
  10   4  20        0.41      206.87    141.86 o 
  11   4  20      103.11      -70.93    121.17 o 
  12   4  20      168.35      424.09    162.54 o 
   1   5  20     1778.39     1546.87    112.85 o 
   2   5  20     1188.75     1148.39    107.87 o 
   3   5  20     1893.04     1581.97    117.72 o 
   4   5  20     1066.81     1087.57    150.72 o 
   5   5  20      481.83      509.80    131.51 o 
   6   5  20      639.96      481.72    134.47 o 
   7   5  20      300.38      484.68    137.42 o 
   8   5  20        4.43      -53.20    103.44 o 
   9   5  20     1381.55     1304.78    190.62 o 
  10   5  20        0.78     -121.17    121.17 o 
  11   5  20     1650.52     1830.83    242.34 o 
   0   6  20      298.46      393.06    116.74 o 
   1   6  20      226.81      181.14     85.70 o 
   2   6  20        7.65       54.67     68.96 o 
   3   6  20      347.39      268.13     77.84 o 
   4   6  20      821.91      626.53    132.99 o 
   5   6  20      141.36        5.91    103.44 o 
   6   6  20      128.75     -100.48    100.48 o 
   7   6  20      178.47      134.47    119.69 o 
   8   6  20       54.96       45.81    119.69 o 
   9   6  20      347.32       94.57    131.51 o 
   1   7  20      375.11      386.39     82.52 o 
   2   7  20        5.26       81.03    175.84 o 
   3   7  20      913.71      872.75    102.82 o 
   4   7  20      128.52      181.33     81.78 o 
   5   7  20      243.78      178.80    121.17 o 
   6   7  20      331.77      258.59    140.38 o 
   1   1  21     1806.96     1623.44     77.51 o 
   2   1  21     2405.62     2350.52     95.55 o 
   3   1  21     4306.62     4378.82    137.74 o 
   4   1  21      453.91      549.67     82.02 o 
   5   1  21       97.94      111.69     84.97 o 
   6   1  21     2862.95     3035.12    155.64 o 
   7   1  21      251.09       56.15    108.61 o 
   8   1  21      154.64      316.16     87.24 o 
   9   1  21      295.08      212.61    109.35 o 
  10   1  21        2.67       41.13     79.93 o 
  11   1  21      838.14     1041.72    127.46 o 
  12   1  21      695.28      814.72    228.30 o 
  13   1  21      778.42      781.69    198.01 o 
  14   1  21      903.08      811.24    202.44 o 
   0   2  21        0.06       21.35     53.44 o 
   1   2  21     1841.49     1921.48    104.72 o 
   2   2  21        0.18      -21.48     38.04 o 
   3   2  21     7512.20     7407.02    155.55 o 
   4   2  21     2285.76     2017.88    162.80 o 
   5   2  21       76.49      149.90    103.95 o 
   6   2  21      952.03     1000.79     89.17 o 
   7   2  21      194.93      187.50    110.83 o 
   8   2  21     4018.23     3954.97    177.63 o 
   9   2  21     2785.10     2756.81    170.23 o 
  10   2  21        1.62      -80.53     80.53 o 
  11   2  21       10.18      -10.34    134.47 o 
  12   2  21      103.22      113.78    140.38 o 
  13   2  21        0.04      -70.93    138.90 o 
   1   3  21      301.30      320.92     48.12 o 
   2   3  21     1106.10     1097.08     66.98 o 
   3   3  21       38.70       31.97     41.72 o 
   4   3  21      476.27      414.26     54.44 o 
   5   3  21     6598.97     6700.35    157.29 o 
   6   3  21       16.15      104.29    107.13 o 
   7   3  21       70.72      115.90     68.17 o 
   8   3  21      503.82      440.35    135.95 o 
   9   3  21     1955.58     1920.97    211.31 o 
  10   3  21     1221.54     1111.21    187.66 o 
  11   3  21        0.19       -1.48    131.51 o 
  12   3  21        1.98      -25.12    137.42 o 
  13   3  21       77.34      118.21    153.68 o 
   0   4  21     2864.39     2820.87    199.49 o 
   1   4  21      398.14      219.50    106.39 o 
   2   4  21      905.51      889.07     74.04 o 
   3   4  21      501.71      502.71     76.67 o 
   4   4  21      428.63      438.87    124.12 o 
   5   4  21       76.25       35.46    101.96 o 
   6   4  21       29.24      -16.25    109.35 o 
   7   4  21      370.01      294.06    119.69 o 
   8   4  21      219.54      362.03    131.51 o 
   9   4  21      681.79      506.84    153.68 o 
  10   4  21     1084.77      939.80    189.14 o 
  11   4  21      268.20      299.97    147.77 o 
  12   4  21      161.61      548.22    183.23 o 
   1   5  21       93.45      113.13     93.09 o 
   2   5  21      193.37      111.56     67.92 o 
   3   5  21      340.89      288.35     82.75 o 
   4   5  21      332.16      387.15    122.65 o 
   5   5  21        3.39        7.39    104.91 o 
   6   5  21      307.58      499.45    141.86 o 
   7   5  21     1324.51     1409.70    192.10 o 
   8   5  21      457.65      391.58    144.81 o 
   9   5  21       13.16     -125.60    125.60 o 
  10   5  21       46.67       76.84    141.86 o 
   0   6  21       79.32       -7.39    100.48 o 
   1   6  21       99.36       83.00     72.61 o 
   2   6  21     1840.66     1889.74    126.92 o 
   3   6  21      504.10      507.44     89.69 o 
   4   6  21      192.51      241.89     79.80 o 
   5   6  21        0.09     -100.48    107.87 o 
   6   6  21      175.75      107.87    119.69 o 
   7   6  21      109.92      -19.21    121.17 o 
   8   6  21        2.56        7.39    124.12 o 
   9   6  21      112.94      172.89    144.81 o 
   1   7  21       17.04       11.82     73.14 o 
   2   7  21      135.00      304.30     83.72 o 
   3   7  21      207.53      300.48     83.06 o 
   4   7  21        0.40      -71.23     71.57 o 
   5   7  21      178.08      129.72     84.08 o 
   6   7  21       47.91       96.05    130.04 o 
   0   0  22    11531.79    12186.35    419.66 o 
   1   0  22     3664.86     3788.44    162.99 o 
   2   0  22      970.14      816.66     92.84 o 
   3   0  22       55.51       29.55     85.70 o 
   4   0  22    13964.46    14266.91    478.77 o 
   5   0  22     1895.76     1615.09    169.93 o 
   6   0  22     3976.29     3917.30    255.64 o 
   7   0  22      640.55      410.79    125.60 o 
   8   0  22       23.66      110.83    116.74 o 
   9   0  22     1719.05     1779.12    200.96 o 
  10   0  22     3596.98     3602.56    271.89 o 
  11   0  22     1896.45     1913.58    226.08 o 
  12   0  22     1016.91      992.99    196.53 o 
  13   0  22       90.90      252.68    159.59 o 
   1   1  22      158.09      199.06     46.13 o 
   2   1  22      170.81      199.96     47.36 o 
   3   1  22        0.05      -28.62     48.78 o 
   4   1  22      416.50      431.01     84.97 o 
   5   1  22     4236.22     4143.79    171.35 o 
   6   1  22     6369.28     6623.68    222.77 o 
   7   1  22    12740.17    13086.27    342.14 o 
   8   1  22     5450.55     5609.36    216.72 o 
   9   1  22      725.34      785.12    116.00 o 
  10   1  22       29.44       10.06     87.02 o 
  11   1  22      337.87      185.17     99.72 o 
  12   1  22       11.62      -60.58    144.81 o 
  13   1  22       83.50      199.49    168.45 o 
   0   2  22     1260.02     1148.39     97.36 o 
   1   2  22      595.83      583.59     57.38 o 
   2   2  22      812.12      860.18     63.77 o 
   3   2  22       40.36       31.51     45.77 o 
   4   2  22     1286.37     1403.43     93.46 o 
   5   2  22      398.36      443.37     72.78 o 
   6   2  22      364.40      301.11    112.30 o 
   7   2  22       21.63        7.31     69.20 o 
   8   2  22     1297.84     1199.11    122.37 o 
   9   2  22      383.82      349.78     91.73 o 
  10   2  22      209.99      237.90    135.95 o 
  11   2  22     1469.45     1473.24    211.31 o 
  12   2  22      207.64      276.32    165.50 o 
  13   2  22       83.94      203.92    174.37 o 
   1   3  22      131.61      103.53     44.50 o 
   2   3  22      420.67      353.62     51.52 o 
   3   3  22     1517.78     1444.45     79.77 o 
   4   3  22      288.49      314.41     54.06 o 
   5   3  22       28.40       43.22     62.82 o 
   6   3  22      641.86      639.36    221.65 o 
   7   3  22      379.56      425.57    135.95 o 
   8   3  22      631.52      601.41    152.20 o 
   9   3  22      976.11      907.29    175.84 o 
  10   3  22     2336.52     2577.06    261.55 o 
  11   3  22      520.48      245.29    141.86 o 
  12   3  22      794.19      849.66    202.44 o 
   0   4  22     3364.13     3271.02    140.12 o 
   1   4  22      128.89       92.65     40.51 o 
   2   4  22      489.78      590.82     89.22 o 
   3   4  22      644.77      722.01    150.72 o 
   4   4  22        0.03      138.90    104.91 o 
   5   4  22      224.83      314.74    122.65 o 
   6   4  22       12.33      -16.25    112.30 o 
   7   4  22        4.50       67.97    121.17 o 
   8   4  22      428.43      534.92    155.16 o 
   9   4  22      180.73      280.76    134.47 o 
  10   4  22       13.53     -101.96    119.69 o 
  11   4  22      528.20      288.15    162.54 o 
   1   5  22      174.81      212.63    110.09 o 
   2   5  22      159.69       95.02     69.91 o 
   3   5  22      169.80      300.64     79.41 o 
   4   5  22      276.35      313.27    119.69 o 
   5   5  22       46.16      277.80    121.17 o 
   6   5  22      232.06      112.30    119.69 o 
   7   5  22       20.15      -19.21    118.21 o 
   8   5  22     1118.07      951.62    169.93 o 
   9   5  22      104.46      -48.76    116.74 o 
  10   5  22      148.15      223.13    158.11 o 
   0   6  22       67.70       32.51     99.00 o 
   1   6  22      211.48      289.42     78.84 o 
   2   6  22      179.47      445.71     87.60 o 
   3   6  22        2.49       67.39     99.74 o 
   4   6  22      482.41      450.63    111.56 o 
   5   6  22      355.03      336.91    131.51 o 
   6   6  22      193.82      468.42    143.33 o 
   7   6  22       29.32       38.42    125.60 o 
   8   6  22       75.70       25.12    127.08 o 
   1   7  22       67.32       90.88     77.32 o 
   2   7  22       39.83       14.86     74.16 o 
   3   7  22       11.86       52.56     76.54 o 
   4   7  22      535.86      719.79    103.38 o 
   5   7  22       28.29       48.93     98.27 o 
   1   1  23      144.57      169.66     48.25 o 
   2   1  23     1662.82     1499.44     79.56 o 
   3   1  23     1770.73     1624.11     97.64 o 
   4   1  23      144.92       51.24     71.67 o 
   5   1  23     2188.00     2303.54    151.46 o 
   6   1  23      933.67      867.31    189.88 o 
   7   1  23      252.36      217.48     85.04 o 
   8   1  23     1240.12     1253.21    125.38 o 
   9   1  23       38.79      -72.61     72.61 o 
  10   1  23     2282.15     2260.73    166.05 o 
  11   1  23       24.99       58.09     92.98 o 
  12   1  23       38.95      221.65    158.11 o 
  13   1  23       18.94      149.24    155.16 o 
   0   2  23        6.41       35.96     64.10 o 
   1   2  23      372.29      435.03     56.52 o 
   2   2  23     1563.55     1604.08     82.81 o 
   3   2  23     5079.87     5132.09    133.70 o 
   4   2  23     1013.03      962.37     72.15 o 
   5   2  23      510.80      467.25     87.91 o 
   6   2  23     2420.75     2305.07    174.37 o 
   7   2  23      106.88      133.46     78.34 o 
   8   2  23     1043.42     1083.44    206.87 o 
   9   2  23      357.03      283.75     92.36 o 
  10   2  23        7.28       -4.43    122.65 o 
  11   2  23     1344.45     1465.85    223.13 o 
  12   2  23      176.28      196.53    150.72 o 
   1   3  23        3.69      -16.54     42.29 o 
   2   3  23      131.54      153.66     47.06 o 
   3   3  23       70.83       71.78     41.67 o 
   4   3  23      359.72      440.14     64.09 o 
   5   3  23       20.76      -11.75     65.85 o 
   6   3  23      157.79       -6.73     67.96 o 
   7   3  23      226.76       19.21    118.21 o 
   8   3  23      179.28      144.81    135.95 o 
   9   3  23      334.64      345.77    141.86 o 
  10   3  23       13.08       17.73    131.51 o 
  11   3  23       64.00      192.10    153.68 o 
  12   3  23      174.22      209.83    159.59 o 
   0   4  23      989.05      799.42    138.90 o 
   1   4  23     4438.99     4309.48    174.49 o 
   2   4  23      723.97      751.46     97.69 o 
   3   4  23       30.91        1.54     73.14 o 
   4   4  23     3395.46     3242.01    234.95 o 
   5   4  23      553.96      471.38    132.99 o 
   6   4  23     1053.37     1075.74    171.41 o 
   7   4  23      417.72      471.38    144.81 o 
   8   4  23      169.37      294.06    138.90 o 
   9   4  23      239.69      263.03    149.24 o 
  10   4  23      388.69      406.36    168.45 o 
  11   4  23       32.19       67.97    141.86 o 
   1   5  23        1.29      106.54     94.57 o 
   2   5  23      124.23       63.75     72.94 o 
   3   5  23       26.93       44.00     74.62 o 
   4   5  23       10.22       45.81    100.48 o 
   5   5  23      814.15      814.20    155.16 o 
   6   5  23     1438.67     1145.19    180.28 o 
   7   5  23      957.02     1205.78    183.23 o 
   8   5  23      166.71       -7.39    131.51 o 
   9   5  23       23.72       59.11    137.42 o 
   0   6  23      251.26      320.65    115.26 o 
   1   6  23     1045.94     1028.82    152.94 o 
   2   6  23      696.09      776.93    104.18 o 
   3   6  23      799.12      902.84    107.00 o 
   4   6  23      743.90      942.26    141.86 o 
   5   6  23     1381.48     1486.54    187.66 o 
   6   6  23      493.48      534.92    152.20 o 
   7   6  23       26.11       82.75    128.56 o 
   1   7  23      108.67       60.22    130.77 o 
   2   7  23       98.94       70.33     83.41 o 
   3   7  23       96.81      191.96     84.58 o 
   4   7  23       71.09      129.37    164.02 o 
   0   0  24    15707.21    16696.20    536.39 o 
   1   0  24       54.17       53.23     90.88 o 
   2   0  24     1742.07     1820.22    124.83 o 
   3   0  24    11069.72    10516.41    282.11 o 
   4   0  24    15620.06    16215.96    545.26 o 
   5   0  24     1408.50     1374.23    174.37 o 
   6   0  24      771.81      910.25    162.54 o 
   7   0  24      916.61      818.63    153.68 o 
   8   0  24      417.29      354.64    128.56 o 
   9   0  24      750.66      571.86    150.72 o 
  10   0  24     1970.41     1795.37    227.56 o 
  11   0  24       95.85       10.34    128.56 o 
  12   0  24        2.44      -35.46    146.29 o 
   1   1  24       11.47       -3.70     45.37 o 
   2   1  24      649.91      737.78     83.73 o 
   3   1  24     1649.12     1638.67     87.07 o 
   4   1  24      989.74      909.83    102.33 o 
   5   1  24      533.67      672.22     95.60 o 
   6   1  24     1670.80     2062.39    143.64 o 
   7   1  24       22.47      -73.65    108.61 o 
   8   1  24        0.42       60.58    116.74 o 
   9   1  24      366.68      458.07    121.17 o 
  10   1  24       63.01      200.63    123.39 o 
  11   1  24      553.02      567.46    117.46 o 
  12   1  24      681.92      933.89    202.44 o 
   0   2  24     4100.90     3630.76    158.27 o 
   1   2  24     2819.16     2869.77    118.59 o 
   2   2  24     5231.67     5370.33    134.35 o 
   3   2  24      340.19      271.39     52.99 o 
   4   2  24     1348.01     1293.23     95.37 o 
   5   2  24        0.91       89.67     71.43 o 
   6   2  24     2572.55     2425.96    153.33 o 
   7   2  24      308.41      269.08     86.05 o 
   8   2  24     1242.45     1224.43    125.80 o 
   9   2  24       57.10      -47.29    125.60 o 
  10   2  24        0.22     -125.60    125.60 o 
  11   2  24      481.54      347.25    159.59 o 
  12   2  24      320.74      653.13    193.57 o
[truncated: 640,984 more chars]
